# Supplementary material for: Repeated sleep disruption in mice leads to persistent shifts in the fecal microbiome and metabolome
Source: PubMed Central journal article supplement (PMC7032712; doi:10.1371/journal.pone.0229001), 2020-02-20

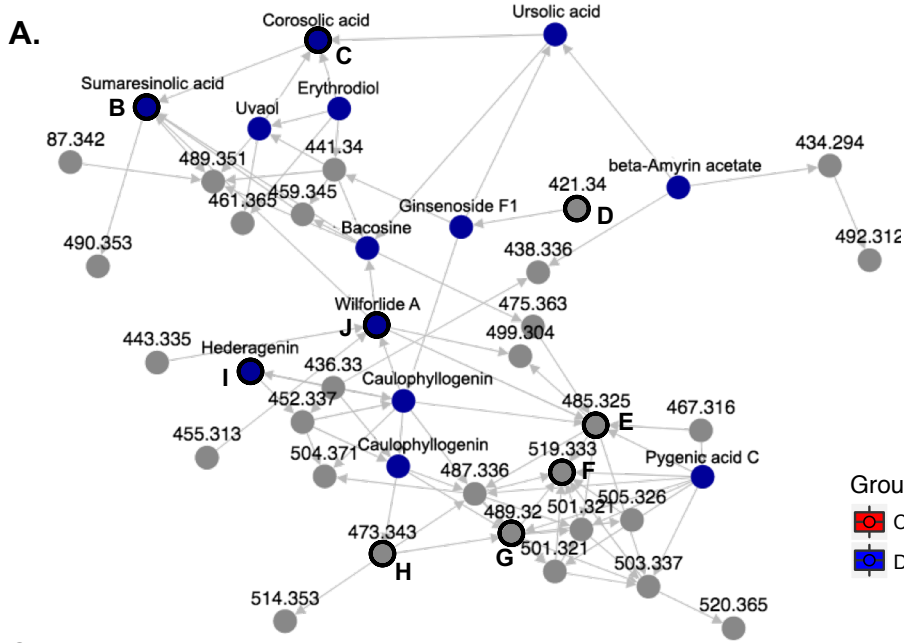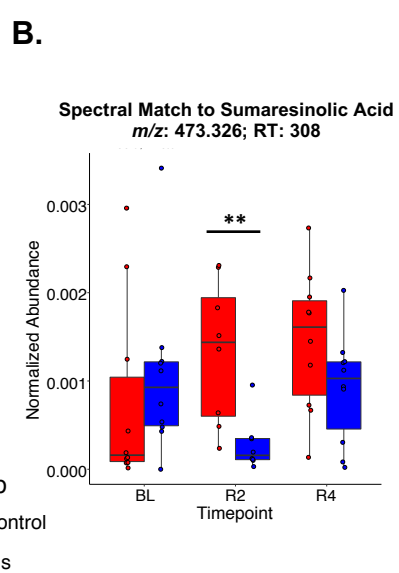

**C.** Spectral Match to Corosolic Acid  
 $m/z$ : 455.356; RT: 262

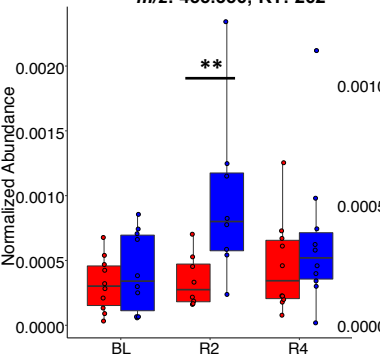

**D.** Unknown Molecule, ID: 871  
 $m/z$ : 421.346; RT: 308

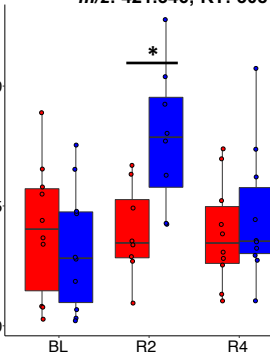

**E.** Unknown Molecule, ID: 204  
 $m/z$ : 485.327; RT: 238

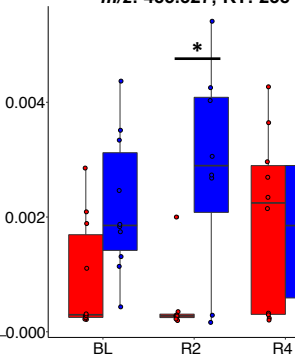

**F.** Unknown Molecule, ID: 133  
 $m/z$ : 519.332; RT: 227

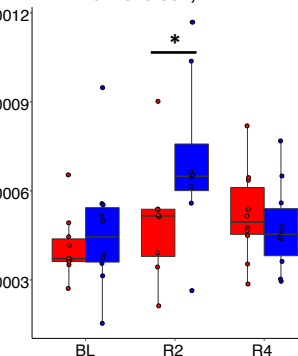

**G.** Unknown Molecule, ID: 645  
 $m/z$ : 489.320; RT: 214

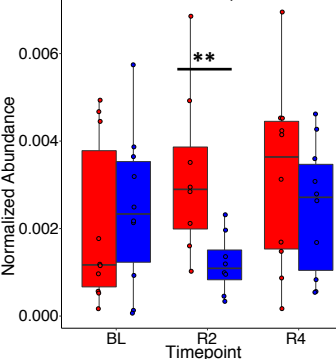

**H.** Unknown Molecule, ID: 273  
 $m/z$ : 473.367; RT: 261

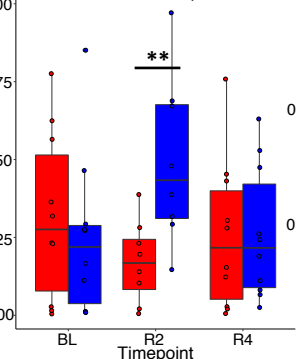

**I.** Spectral Match to Hederagenin  
 $m/z$ : 437.304; RT: 280

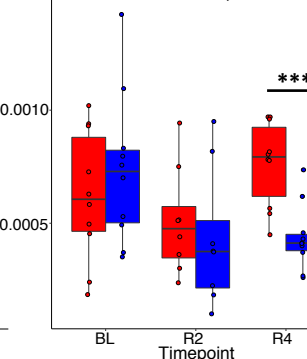

**J.** Spectral Match to Wilforlide A  
 $m/z$ : 455.314; RT: 292

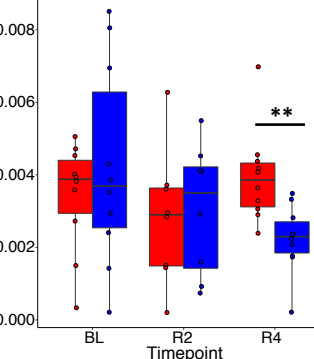

Supplement: pone.0229001.s004.pdf [file pone.0229001.s004.pdf]
