# Supplementary material for: Repeated sleep disruption in mice leads to persistent shifts in the fecal microbiome and metabolome
Source: PLoS One. 2020 Feb 20;15(2):e0229001. doi: 10.1371/journal.pone.0229001 (PMC7032712; doi:10.1371/journal.pone.0229001)
Supplement: S4 Table — Results are listed above, with p-values, adjusted p-values, and fold-change ((Sleep Disruption-Control)/Control) listed for each detected Enzyme Commission number. Zero genes were significantly differentially abundant (FDR < 0.1) at BL, 176 were differentially abundant at R2, and zero were differentially abundant at R4. Abbreviations: Dis, sleep disruption; Con, control; N/A, not applicable; Inf, infinity. n = 8-10/group. (XLSX) [file pone.0229001.s010.xlsx]

## Sheet: Sheet1
Timepoint	Enzyme	pval	padj	Fold Change (Dis-Con)/Con				Timepoint	Enzyme	pval	padj	Fold Change (Dis-Con)/Con				Timepoint	Enzyme	pval	padj	Fold Change (Dis-Con)/Con
BL	EC:1.1.1.1	0.954482	0.996109	-0.147112				R2	EC:1.1.1.1	1.25952e-06	0.000240148	-0.043139				R4	EC:1.1.1.1	0.0540531	0.903833	-0.249301
BL	EC:1.1.1.100	0.30955	0.996109	-0.199338				R2	EC:1.1.1.100	0.73637	0.824695	0.134707				R4	EC:1.1.1.100	0.371361	0.998145	-0.185169
BL	EC:1.1.1.103	0.0203862	0.996109	-0.378839				R2	EC:1.1.1.103	0.272341	0.436492	-0.0821021				R4	EC:1.1.1.103	0.00717984	0.903833	-0.494427
BL	EC:1.1.1.108	0.878172	0.996109	-1				R2	EC:1.1.1.108	1	NA	-1				R4	EC:1.1.1.108	0.92752	0.998145	-0.98645
BL	EC:1.1.1.11	0.750396	0.996109	Inf				R2	EC:1.1.1.122	0.945813	NA	0				R4	EC:1.1.1.11	1	NA	-1
BL	EC:1.1.1.122	0.750396	0.996109	Inf				R2	EC:1.1.1.125	0.0824882	0.221879	-0.416679				R4	EC:1.1.1.122	0.755139	0.998145	-0.99223
BL	EC:1.1.1.125	0.346144	0.996109	-0.429339				R2	EC:1.1.1.130	0.0826857	0.221879	-0.419278				R4	EC:1.1.1.125	0.105264	0.903833	-0.522692
BL	EC:1.1.1.130	0.355441	0.996109	-0.419329				R2	EC:1.1.1.132	1	NA	-1				R4	EC:1.1.1.130	0.0898012	0.903833	-0.558916
BL	EC:1.1.1.132	0.878172	0.996109	-1				R2	EC:1.1.1.133	0.111378	0.248705	0.0460313				R4	EC:1.1.1.132	0.92752	0.998145	-0.98916
BL	EC:1.1.1.133	0.466257	0.996109	-0.174996				R2	EC:1.1.1.136	0.879619	0.917306	0.152753				R4	EC:1.1.1.133	0.475916	0.998145	-0.171373
BL	EC:1.1.1.136	0.691101	0.996109	-0.24066				R2	EC:1.1.1.137	0.353471	NA	-1				R4	EC:1.1.1.136	0.321451	0.998145	0.0189599
BL	EC:1.1.1.137	0.439659	0.996109	-0.959459				R2	EC:1.1.1.14	0.415169	0.588666	0.21596				R4	EC:1.1.1.137	0.822101	0.998145	-0.994856
BL	EC:1.1.1.14	0.544411	0.996109	-0.21362				R2	EC:1.1.1.140	0.572638	0.692492	0.4875				R4	EC:1.1.1.14	0.747189	0.998145	-0.198233
BL	EC:1.1.1.140	0.935488	0.996109	-0.39604				R2	EC:1.1.1.157	0.0022213	0.0581741	0.59236				R4	EC:1.1.1.140	0.15018	0.903833	-0.923038
BL	EC:1.1.1.145	0.662859	0.996109	Inf				R2	EC:1.1.1.159	0.0849478	0.221879	0.775454				R4	EC:1.1.1.157	0.307966	0.998145	-0.0757309
BL	EC:1.1.1.157	0.313207	0.996109	-0.0503967				R2	EC:1.1.1.169	0.789504	0.866821	0.180056				R4	EC:1.1.1.159	0.536659	0.998145	-0.278208
BL	EC:1.1.1.159	0.501997	0.996109	-0.236485				R2	EC:1.1.1.17	0.925627	0.950554	0.305699				R4	EC:1.1.1.169	0.120408	0.903833	-0.301087
BL	EC:1.1.1.169	0.716608	0.996109	-0.188298				R2	EC:1.1.1.173	0.864314	NA	-0.333333				R4	EC:1.1.1.17	0.867197	0.998145	-0.719162
BL	EC:1.1.1.17	0.641125	0.996109	0.0401235				R2	EC:1.1.1.18	0.872297	0.915511	-0.134715				R4	EC:1.1.1.173	0.755139	0.998145	Inf
BL	EC:1.1.1.18	0.890701	0.996109	-0.190141				R2	EC:1.1.1.193	0.245831	0.406207	-0.00454581				R4	EC:1.1.1.18	0.106378	0.903833	-0.616378
BL	EC:1.1.1.193	0.877969	0.996109	-0.180107				R2	EC:1.1.1.202	0.532507	0.657871	-0.273245				R4	EC:1.1.1.193	0.862043	0.998145	-0.13999
BL	EC:1.1.1.202	0.507094	0.996109	-0.304608				R2	EC:1.1.1.203	1	NA	-1				R4	EC:1.1.1.202	0.679202	0.998145	0.044121
BL	EC:1.1.1.203	0.697284	0.996109	-1				R2	EC:1.1.1.205	0.875058	0.916692	0.130598				R4	EC:1.1.1.203	0.862073	0.998145	-0.975031
BL	EC:1.1.1.205	0.186511	0.996109	-0.140874				R2	EC:1.1.1.215	0.615012	NA	-1				R4	EC:1.1.1.205	0.206998	0.941367	-0.129332
BL	EC:1.1.1.215	0.755983	0.996109	1				R2	EC:1.1.1.219	0.0762667	NA	-0.733333				R4	EC:1.1.1.206	1	NA	-1
BL	EC:1.1.1.219	0.841272	0.996109	Inf				R2	EC:1.1.1.22	0.16815	0.324106	0.0755854				R4	EC:1.1.1.215	0.92752	0.998145	-0.999071
BL	EC:1.1.1.22	0.312117	0.996109	-0.190912				R2	EC:1.1.1.23	0.0027514	0.0638638	0.185491				R4	EC:1.1.1.219	0.865139	0.998145	-0.895178
BL	EC:1.1.1.23	0.580764	0.996109	-0.150753				R2	EC:1.1.1.25	0.035863	0.158407	0.193837				R4	EC:1.1.1.22	0.734096	0.998145	-0.163985
BL	EC:1.1.1.25	0.783996	0.996109	-0.161724				R2	EC:1.1.1.26	0.0880205	0.221879	-0.418571				R4	EC:1.1.1.23	0.0234565	0.903833	-0.114135
BL	EC:1.1.1.26	0.352931	0.996109	-0.4318				R2	EC:1.1.1.261	0.676209	0.778253	0.119448				R4	EC:1.1.1.25	0.64035	0.998145	-0.140698
BL	EC:1.1.1.261	0.650825	0.996109	-0.304274				R2	EC:1.1.1.262	0.0966825	0.230078	-0.172915				R4	EC:1.1.1.251	1	NA	-1
BL	EC:1.1.1.262	0.420403	0.996109	-0.240686				R2	EC:1.1.1.264	0.938388	NA	Inf				R4	EC:1.1.1.26	0.195438	0.941367	-0.497188
BL	EC:1.1.1.264	0.750396	0.996109	Inf				R2	EC:1.1.1.267	0.0145081	0.0994933	0.162624				R4	EC:1.1.1.261	0.514741	0.998145	0.103284
BL	EC:1.1.1.267	0.123701	0.996109	-0.139392				R2	EC:1.1.1.27	0.875372	0.916692	0.114572				R4	EC:1.1.1.262	0.390795	0.998145	-0.221753
BL	EC:1.1.1.27	0.892187	0.996109	-0.13795				R2	EC:1.1.1.271	0.81626	0.88056	0.0784263				R4	EC:1.1.1.264	0.822795	0.998145	-0.907407
BL	EC:1.1.1.271	0.474344	0.996109	-0.19775				R2	EC:1.1.1.276	0.945813	NA	0				R4	EC:1.1.1.267	0.233694	0.953217	-0.13214
BL	EC:1.1.1.28	0.92707	0.996109	-0.156994				R2	EC:1.1.1.28	0.0641509	0.201087	0.55684				R4	EC:1.1.1.27	0.892367	0.998145	-0.142599
BL	EC:1.1.1.281	0.299709	0.996109	-0.653333				R2	EC:1.1.1.281	0.728878	0.822665	-0.121212				R4	EC:1.1.1.271	0.186025	0.911155	-0.0866087
BL	EC:1.1.1.282	0.750396	0.996109	Inf				R2	EC:1.1.1.282	0.615012	NA	-1				R4	EC:1.1.1.276	0.755139	0.998145	-0.983416
BL	EC:1.1.1.284	0.798838	0.996109	-0.153846				R2	EC:1.1.1.284	0.83867	0.895212	-0.787879				R4	EC:1.1.1.28	0.694512	0.998145	-0.136912
BL	EC:1.1.1.29	0.483519	0.996109	-0.201618				R2	EC:1.1.1.29	0.2709	0.436492	0.034328				R4	EC:1.1.1.281	0.827453	0.998145	0.0573477
BL	EC:1.1.1.290	0.641471	0.996109	-0.113831				R2	EC:1.1.1.290	0.189559	0.347054	-0.130732				R4	EC:1.1.1.282	1	NA	-1
BL	EC:1.1.1.3	0.867663	0.996109	-0.158912				R2	EC:1.1.1.3	0.527348	0.653615	0.155547				R4	EC:1.1.1.284	0.279569	0.998145	-0.974229
BL	EC:1.1.1.30	0.878172	0.996109	-1				R2	EC:1.1.1.30	0.936597	NA	-0.870968				R4	EC:1.1.1.29	0.365628	0.998145	-0.196785
BL	EC:1.1.1.302	0.795378	0.996109	-0.245139				R2	EC:1.1.1.302	0.083593	0.221879	0.664149				R4	EC:1.1.1.290	0.950217	0.998145	-0.137809
BL	EC:1.1.1.303	0.878172	0.996109	-1				R2	EC:1.1.1.303	0.808327	NA	-0.947368				R4	EC:1.1.1.3	0.44592	0.998145	-0.174217
BL	EC:1.1.1.304	0.650674	0.996109	-0.375				R2	EC:1.1.1.304	0.0746164	0.214636	-0.72973				R4	EC:1.1.1.30	0.591895	0.998145	-0.968789
BL	EC:1.1.1.305	0.851702	0.996109	-0.107198				R2	EC:1.1.1.305	0.00512358	0.0749877	1.60157				R4	EC:1.1.1.302	0.20126	0.941367	0.182849
BL	EC:1.1.1.31	0.233614	0.996109	-0.246398				R2	EC:1.1.1.306	1	NA	-1				R4	EC:1.1.1.303	0.990628	0.998145	-0.98004
BL	EC:1.1.1.313	0.662859	0.996109	Inf				R2	EC:1.1.1.308	0.874137	NA	-1				R4	EC:1.1.1.304	0.449647	0.998145	-0.811828
BL	EC:1.1.1.336	0.477798	0.996109	0.153846				R2	EC:1.1.1.31	0.000797911	0.0338078	-0.110779				R4	EC:1.1.1.305	0.842599	0.998145	-0.181753
BL	EC:1.1.1.343	0.847722	0.996109	-0.173645				R2	EC:1.1.1.312	0.864314	NA	-0.333333				R4	EC:1.1.1.306	1	NA	-1
BL	EC:1.1.1.346	0.385073	0.996109	5				R2	EC:1.1.1.320	0.845278	NA	Inf				R4	EC:1.1.1.31	0.00385331	0.725914	-0.409122
BL	EC:1.1.1.35	0.363161	0.996109	2.16667				R2	EC:1.1.1.333	1	NA	-1				R4	EC:1.1.1.312	0.755139	0.998145	Inf
BL	EC:1.1.1.350	0.662859	0.996109	Inf				R2	EC:1.1.1.336	0.0760121	0.217395	-0.605263				R4	EC:1.1.1.313	1	NA	-1
BL	EC:1.1.1.363	0.84804	0.996109	-0.173532				R2	EC:1.1.1.343	0.0073629	0.0779922	-0.355972				R4	EC:1.1.1.320	1	NA	-1
BL	EC:1.1.1.367	0.9269	0.996109	-0.0424448				R2	EC:1.1.1.346	0.332567	NA	-1				R4	EC:1.1.1.328	1	NA	-1
BL	EC:1.1.1.369	0.890701	0.996109	-0.190141				R2	EC:1.1.1.35	0.562558	0.685374	-0.831776				R4	EC:1.1.1.333	1	NA	-1
BL	EC:1.1.1.37	0.832528	0.996109	-0.129941				R2	EC:1.1.1.350	0.481053	NA	-1				R4	EC:1.1.1.335	0.911304	0.998145	-1
BL	EC:1.1.1.373	0.750396	0.996109	Inf				R2	EC:1.1.1.36	0.583011	NA	-0.777778				R4	EC:1.1.1.336	0.51227	0.998145	-0.98835
BL	EC:1.1.1.38	0.954713	0.996109	-0.147789				R2	EC:1.1.1.363	0.00733121	0.0779922	-0.356324				R4	EC:1.1.1.339	1	NA	-1
BL	EC:1.1.1.380	0.355065	0.996109	-0.430782				R2	EC:1.1.1.367	0.938268	0.959575	0.635456				R4	EC:1.1.1.343	0.658934	0.998145	-0.213471
BL	EC:1.1.1.381	0.69076	0.996109	1.33333				R2	EC:1.1.1.369	0.872297	0.915511	-0.134715				R4	EC:1.1.1.346	0.990628	0.998145	-0.999503
BL	EC:1.1.1.4	0.878172	0.996109	-1				R2	EC:1.1.1.37	0.0817315	0.221879	-0.208584				R4	EC:1.1.1.35	0.50913	0.998145	-0.995878
BL	EC:1.1.1.40	0.952225	0.996109	-0.169706				R2	EC:1.1.1.373	0.615012	NA	-1				R4	EC:1.1.1.350	1	NA	-1
BL	EC:1.1.1.41	0.0181213	0.996109	1.42715				R2	EC:1.1.1.376	0.945813	NA	0				R4	EC:1.1.1.36	0.366087	0.998145	-0.970951
BL	EC:1.1.1.42	0.360611	0.996109	-0.216519				R2	EC:1.1.1.377	0.864314	NA	-0.333333				R4	EC:1.1.1.363	0.628159	0.998145	-0.221145
BL	EC:1.1.1.43	0.878172	0.996109	-1				R2	EC:1.1.1.378	0.864314	NA	-0.333333				R4	EC:1.1.1.367	0.370998	0.998145	0.568333
BL	EC:1.1.1.44	0.847722	0.996109	-0.173645				R2	EC:1.1.1.38	0.105623	0.238799	0.297701				R4	EC:1.1.1.369	0.106378	0.903833	-0.616378
BL	EC:1.1.1.47	0.347886	0.996109	-0.43182				R2	EC:1.1.1.380	0.0881612	0.221879	-0.418524				R4	EC:1.1.1.37	0.817944	0.998145	-0.118263
BL	EC:1.1.1.49	0.84804	0.996109	-0.173532				R2	EC:1.1.1.381	0.454679	NA	-1				R4	EC:1.1.1.370	1	NA	-1
BL	EC:1.1.1.51	0.662859	0.996109	Inf				R2	EC:1.1.1.4	0.808327	NA	-0.947368				R4	EC:1.1.1.371	1	NA	-1
BL	EC:1.1.1.57	0.713919	0.996109	-0.207714				R2	EC:1.1.1.40	0.203978	0.358099	-0.0968277				R4	EC:1.1.1.373	1	NA	-1
BL	EC:1.1.1.58	0.911918	0.996109	-0.165632				R2	EC:1.1.1.41	0.00466716	0.0749877	1.75938				R4	EC:1.1.1.376	0.755139	0.998145	Inf
BL	EC:1.1.1.6	0.0603172	0.996109	-0.304145				R2	EC:1.1.1.42	0.0390555	0.164869	0.405157				R4	EC:1.1.1.377	0.755139	0.998145	Inf
BL	EC:1.1.1.60	0.0646392	0.996109	-0.358618				R2	EC:1.1.1.43	1	NA	-1				R4	EC:1.1.1.378	0.755139	0.998145	Inf
BL	EC:1.1.1.61	0.750396	0.996109	Inf				R2	EC:1.1.1.44	0.0073629	0.0779922	-0.355972				R4	EC:1.1.1.38	0.700569	0.998145	-0.191333
BL	EC:1.1.1.67	0.878172	0.996109	-1				R2	EC:1.1.1.47	0.08612	0.221879	-0.418422				R4	EC:1.1.1.380	0.181854	0.903833	-0.501187
BL	EC:1.1.1.69	0.679752	0.996109	-0.184893				R2	EC:1.1.1.48	0.797178	NA	-0.5				R4	EC:1.1.1.381	0.765069	0.998145	-1
BL	EC:1.1.1.76	0.650674	0.996109	-0.375				R2	EC:1.1.1.49	0.00733121	0.0779922	-0.356324				R4	EC:1.1.1.387	1	NA	-1
BL	EC:1.1.1.77	0.312003	0.996109	-0.262648				R2	EC:1.1.1.53	1	NA	-1				R4	EC:1.1.1.4	0.990628	0.998145	-0.98004
BL	EC:1.1.1.79	0.653246	0.996109	2				R2	EC:1.1.1.57	0.972406	0.980541	0.0318692				R4	EC:1.1.1.40	0.907438	0.998145	-0.121693
BL	EC:1.1.1.81	0.835325	0.996109	0.383754				R2	EC:1.1.1.58	0.0573331	0.188637	-0.170849				R4	EC:1.1.1.41	0.153329	0.903833	0.138992
BL	EC:1.1.1.83	0.353049	0.996109	-0.431624				R2	EC:1.1.1.6	0.0822747	0.221879	-0.0726802				R4	EC:1.1.1.42	0.954106	0.998145	-0.185983
BL	EC:1.1.1.85	0.489457	0.996109	-0.149068				R2	EC:1.1.1.60	0.0539733	0.181857	-0.16368				R4	EC:1.1.1.43	0.92752	0.998145	-0.960317
BL	EC:1.1.1.86	0.525719	0.996109	-0.149545				R2	EC:1.1.1.61	0.517815	NA	-1				R4	EC:1.1.1.44	0.658934	0.998145	-0.213471
BL	EC:1.1.1.88	0.352025	0.996109	-0.378109				R2	EC:1.1.1.67	1	NA	-1				R4	EC:1.1.1.47	0.183508	0.904779	-0.495068
BL	EC:1.1.1.90	0.878172	0.996109	-1				R2	EC:1.1.1.69	0.0803315	0.221879	-0.0757146				R4	EC:1.1.1.48	0.649046	0.998145	2.33333
BL	EC:1.1.1.93	0.353049	0.996109	-0.431624				R2	EC:1.1.1.76	0.0746164	0.214636	-0.72973				R4	EC:1.1.1.49	0.628159	0.998145	-0.221145
BL	EC:1.1.1.94	0.184188	0.996109	-0.141126				R2	EC:1.1.1.77	0.797105	0.871841	0.116572				R4	EC:1.1.1.53	1	NA	-1
BL	EC:1.1.1.95	0.674894	0.996109	-0.183409				R2	EC:1.1.1.79	0.656983	NA	-0.909091				R4	EC:1.1.1.56	1	NA	-1
BL	EC:1.1.2.3	0.654696	0.996109	1.25				R2	EC:1.1.1.81	0.0624753	0.19897	1.08408				R4	EC:1.1.1.57	0.587886	0.998145	-0.25423
BL	EC:1.1.2.4	0.662859	0.996109	Inf				R2	EC:1.1.1.83	0.087515	0.221879	-0.420202				R4	EC:1.1.1.58	0.46354	0.998145	-0.122737
BL	EC:1.1.2.8	0.697284	0.996109	-1				R2	EC:1.1.1.85	0.00360503	0.0678077	0.187632				R4	EC:1.1.1.6	0.0157792	0.903833	-0.411007
BL	EC:1.1.3.15	0.224278	0.996109	-0.450665				R2	EC:1.1.1.86	0.00489032	0.0749877	0.185878				R4	EC:1.1.1.60	0.011872	0.903833	-0.493693
BL	EC:1.1.3.21	0.607749	0.996109	-0.636364				R2	EC:1.1.1.88	0.0090348	0.0820302	-0.927556				R4	EC:1.1.1.61	1	NA	-1
BL	EC:1.1.3.47	0.878172	0.996109	-1				R2	EC:1.1.1.90	1	NA	-1				R4	EC:1.1.1.67	0.92752	0.998145	-0.952719
BL	EC:1.1.5.2	0.653246	0.996109	2				R2	EC:1.1.1.91	0.518992	NA	-1				R4	EC:1.1.1.69	0.321267	0.998145	-0.205847
BL	EC:1.1.5.3	0.765761	0.996109	-0.170599				R2	EC:1.1.1.93	0.087515	0.221879	-0.420202				R4	EC:1.1.1.76	0.449647	0.998145	-0.811828
BL	EC:1.1.5.4	0.591203	0.996109	1.25				R2	EC:1.1.1.94	0.478381	0.620089	0.137384				R4	EC:1.1.1.77	0.704951	0.998145	-0.234315
BL	EC:1.1.5.6	1	NA	Inf				R2	EC:1.1.1.95	0.501056	0.636898	0.0519158				R4	EC:1.1.1.79	0.912081	0.998145	-0.998553
BL	EC:1.1.5.8	0.934316	0.996109	0				R2	EC:1.1.2.3	0.566325	NA	-0.970588				R4	EC:1.1.1.81	0.0547013	0.903833	-0.803811
BL	EC:1.1.9.1	0.878172	0.996109	-1				R2	EC:1.1.2.4	1	NA	-1				R4	EC:1.1.1.83	0.162809	0.903833	-0.50858
BL	EC:1.1.99.1	0.687595	0.996109	1.5				R2	EC:1.1.2.8	1	NA	-1				R4	EC:1.1.1.85	0.0278902	0.903833	-0.119322
BL	EC:1.1.99.3	0.697284	0.996109	2.5				R2	EC:1.1.3.15	0.422721	0.597766	0.256924				R4	EC:1.1.1.86	0.0342299	0.903833	-0.120876
BL	EC:1.10.2.2	0.8416	0.996109	0.5				R2	EC:1.1.3.21	0.816674	0.88056	0.666667				R4	EC:1.1.1.88	0.433915	0.998145	0.553589
BL	EC:1.10.3.12	0.750396	0.996109	Inf				R2	EC:1.1.3.47	1	NA	-1				R4	EC:1.1.1.90	1	NA	-1
BL	EC:1.11.1.1	0.389853	0.996109	-0.692308				R2	EC:1.1.3.6	0.845278	NA	-0.9375				R4	EC:1.1.1.91	1	NA	-1
BL	EC:1.11.1.10	0.893854	0.996109	-0.215657				R2	EC:1.1.3.8	0.518992	NA	-1				R4	EC:1.1.1.93	0.162809	0.903833	-0.50858
BL	EC:1.11.1.15	0.686487	0.996109	-0.171133				R2	EC:1.1.5.2	0.682969	NA	-0.944444				R4	EC:1.1.1.94	0.144313	0.903833	-0.124544
BL	EC:1.11.1.21	0.220467	0.996109	Inf				R2	EC:1.1.5.3	0.0967292	0.230078	0.006116				R4	EC:1.1.1.95	0.16902	0.903833	-0.219794
BL	EC:1.11.1.5	0.245939	0.996109	-0.515027				R2	EC:1.1.5.4	0.794822	NA	-0.959459				R4	EC:1.1.2.3	0.771345	0.998145	-0.995272
BL	EC:1.11.1.6	0.221576	0.996109	-0.792899				R2	EC:1.1.5.6	1	NA	-1				R4	EC:1.1.2.4	1	NA	-1
BL	EC:1.11.1.9	0.856663	0.996109	-0.20855				R2	EC:1.1.5.8	1	NA	-1				R4	EC:1.1.2.8	0.862073	0.998145	-0.986367
BL	EC:1.11.2.4	0.607749	0.996109	-0.636364				R2	EC:1.1.9.1	1	NA	-1				R4	EC:1.1.3.15	0.448363	0.998145	-0.277049
BL	EC:1.12.1.3	0.812667	0.996109	-0.161632				R2	EC:1.1.98.2	0.518992	NA	-1				R4	EC:1.1.3.21	0.461154	0.998145	0.8107
BL	EC:1.12.7.2	0.421754	0.996109	-0.277831				R2	EC:1.1.98.3	1	NA	-1				R4	EC:1.1.3.46	0.984308	0.998145	-1
BL	EC:1.12.99.6	0.640448	0.996109	-0.0355422				R2	EC:1.1.99.1	0.936597	NA	-0.945205				R4	EC:1.1.3.47	0.576881	0.998145	-0.84127
BL	EC:1.13.11.11	0.878172	0.996109	-1				R2	EC:1.1.99.28	0.874137	NA	-1				R4	EC:1.1.3.6	1	NA	-1
BL	EC:1.13.11.15	0.878172	0.996109	-1				R2	EC:1.1.99.3	0.845278	NA	-0.9375				R4	EC:1.1.5.2	0.92752	0.998145	-0.99911
BL	EC:1.13.11.16	0.750396	0.996109	Inf				R2	EC:1.10.2.2	0.945813	NA	-0.909091				R4	EC:1.1.5.3	0.0693282	0.903833	-0.283427
BL	EC:1.13.11.2	0.993681	0.997622	-0.272727				R2	EC:1.10.3.12	0.544477	NA	-0.875				R4	EC:1.1.5.4	0.777155	0.998145	-0.998419
BL	EC:1.13.11.25	0.662859	0.996109	Inf				R2	EC:1.11.1.1	0.73323	0.823312	0.888889				R4	EC:1.1.5.6	1	NA	-1
BL	EC:1.13.11.27	0.919759	0.996109	0.25				R2	EC:1.11.1.10	0.124702	0.266021	-0.189547				R4	EC:1.1.5.8	0.992514	0.998145	-0.975669
BL	EC:1.13.11.3	1	NA	-1				R2	EC:1.11.1.15	0.0573826	0.188637	-0.0233989				R4	EC:1.1.9.1	0.536234	0.998145	-0.908046
BL	EC:1.13.11.49	0.750396	0.996109	Inf				R2	EC:1.11.1.19	0.518992	NA	-1				R4	EC:1.1.99.1	0.697183	0.998145	-0.979424
BL	EC:1.13.11.5	0.8416	0.996109	0.5				R2	EC:1.11.1.21	0.386267	0.556536	-0.4				R4	EC:1.1.99.3	0.946022	0.998145	-0.987544
BL	EC:1.13.11.53	0.878172	0.996109	-1				R2	EC:1.11.1.5	0.697384	0.798606	0.274822				R4	EC:1.10.2.2	0.6865	0.998145	-0.973226
BL	EC:1.13.11.54	0.878172	0.996109	-1				R2	EC:1.11.1.6	0.00530944	0.0749877	-0.949772				R4	EC:1.10.3.12	1	NA	-1
BL	EC:1.13.11.75	0.662859	0.996109	Inf				R2	EC:1.11.1.9	0.750677	0.834572	0.210235				R4	EC:1.11.1.1	0.604406	0.998145	0.134259
BL	EC:1.13.11.79	0.878172	0.996109	-1				R2	EC:1.11.2.4	0.73323	0.823312	0.888889				R4	EC:1.11.1.10	0.560182	0.998145	-0.483041
BL	EC:1.13.11.9	0.934316	0.996109	0				R2	EC:1.12.1.3	0.630685	0.743178	0.07281				R4	EC:1.11.1.15	0.648387	0.998145	-0.159194
BL	EC:1.13.12.16	0.740421	0.996109	-0.278146				R2	EC:1.12.7.2	0.191478	0.347649	-0.140986				R4	EC:1.11.1.21	0.263556	0.985868	-0.994684
BL	EC:1.13.12.3	0.697284	0.996109	-1				R2	EC:1.12.99.6	0.0452456	0.1766	-0.481961				R4	EC:1.11.1.5	0.80486	0.998145	-0.0143468
BL	EC:1.14.11.1	0.878172	0.996109	-1				R2	EC:1.13.11.1	0.518992	NA	-1				R4	EC:1.11.1.6	0.0818811	0.903833	-0.988767
BL	EC:1.14.11.17	0.769372	0.996109	0.666667				R2	EC:1.13.11.11	0.936597	NA	-0.826087				R4	EC:1.11.1.9	0.464565	0.998145	-0.235713
BL	EC:1.14.11.33	0.755983	0.996109	1				R2	EC:1.13.11.15	1	NA	-1				R4	EC:1.11.2.4	0.579801	0.998145	0.321321
BL	EC:1.14.11.47	0.503422	0.996109	2.5				R2	EC:1.13.11.16	0.390201	NA	-1				R4	EC:1.12.1.3	0.324441	0.998145	-0.21313
BL	EC:1.14.12.17	0.188022	0.996109	-0.942953				R2	EC:1.13.11.2	0.660535	0.768225	-0.296296				R4	EC:1.12.5.1	0.765069	0.998145	-1
BL	EC:1.14.12.18	0.662859	0.996109	Inf				R2	EC:1.13.11.25	0.518992	NA	-1				R4	EC:1.12.7.2	0.229981	0.953217	-0.380038
BL	EC:1.14.12.19	0.662859	0.996109	Inf				R2	EC:1.13.11.27	0.945813	NA	-0.960784				R4	EC:1.12.99.6	0.884421	0.998145	-0.272118
BL	EC:1.14.13.113	0.750396	0.996109	Inf				R2	EC:1.13.11.3	1	NA	-1				R4	EC:1.13.11.1	1	NA	-1
BL	EC:1.14.13.114	0.934316	0.996109	0				R2	EC:1.13.11.4	0.864314	NA	-0.333333				R4	EC:1.13.11.11	0.903699	0.998145	-0.979519
BL	EC:1.14.13.127	0.872518	0.996109	-0.5				R2	EC:1.13.11.49	0.845278	NA	-0.947368				R4	EC:1.13.11.15	0.92752	0.998145	-0.976359
BL	EC:1.14.13.129	0.750396	0.996109	Inf				R2	EC:1.13.11.5	0.945813	NA	-0.916667				R4	EC:1.13.11.16	1	NA	-1
BL	EC:1.14.13.131	0.878172	0.996109	-1				R2	EC:1.13.11.53	0.845278	NA	-0.913043				R4	EC:1.13.11.2	0.81464	0.998145	-0.114878
BL	EC:1.14.13.142	1	NA	Inf				R2	EC:1.13.11.54	0.845278	NA	-0.913043				R4	EC:1.13.11.25	1	NA	-1
BL	EC:1.14.13.148	0.8416	0.996109	0.5				R2	EC:1.13.11.79	1	NA	-1				R4	EC:1.13.11.27	0.739552	0.998145	-0.978355
BL	EC:1.14.13.2	0.878172	0.996109	-1				R2	EC:1.13.11.8	0.599373	NA	-0.555556				R4	EC:1.13.11.3	0.905352	0.998145	-0.984301
BL	EC:1.14.13.59	0.878172	0.996109	-1				R2	EC:1.13.11.9	1	NA	-1				R4	EC:1.13.11.4	0.755139	0.998145	-0.958848
BL	EC:1.14.13.72	0.662859	0.996109	Inf				R2	EC:1.13.12.16	0.474839	0.620089	-0.439628				R4	EC:1.13.11.49	1	NA	-1
BL	EC:1.14.13.82	0.676181	0.996109	-0.555556				R2	EC:1.13.12.3	1	NA	-1				R4	EC:1.13.11.5	0.903699	0.998145	-0.987374
BL	EC:1.14.13.83	0.878172	0.996109	-1				R2	EC:1.14.11.1	1	NA	-1				R4	EC:1.13.11.53	0.92752	0.998145	-0.994808
BL	EC:1.14.14.12	0.662859	0.996109	Inf				R2	EC:1.14.11.17	0.566325	NA	-0.978022				R4	EC:1.13.11.54	0.92752	0.998145	-0.994808
BL	EC:1.14.14.5	0.911916	0.996109	-0.25				R2	EC:1.14.11.18	0.708194	NA	-1				R4	EC:1.13.11.57	1	NA	-1
BL	EC:1.14.14.9	0.350031	0.996109	-0.4318				R2	EC:1.14.11.2	0.528282	NA	-0.666667				R4	EC:1.13.11.6	1	NA	-1
BL	EC:1.14.15.3	0.878172	0.996109	-1				R2	EC:1.14.11.33	0.615012	NA	-1				R4	EC:1.13.11.79	0.92752	0.998145	-0.989712
BL	EC:1.14.16.1	0.8416	0.996109	0.5				R2	EC:1.14.11.47	0.615012	NA	-1				R4	EC:1.13.11.8	0.614766	0.998145	Inf
BL	EC:1.14.19.3	0.750396	0.996109	Inf				R2	EC:1.14.12.10	1	NA	-1				R4	EC:1.13.11.9	0.576881	0.998145	-0.84127
BL	EC:1.14.99.46	0.750396	0.996109	Inf				R2	EC:1.14.12.17	0.0491077	0.180641	-0.99341				R4	EC:1.13.12.16	0.173612	0.903833	-0.756156
BL	EC:1.15.1.1	0.540214	0.996109	-0.180156				R2	EC:1.14.12.7	0.874137	NA	-1				R4	EC:1.13.12.3	0.862073	0.998145	-0.97076
BL	EC:1.15.1.2	0.615566	0.996109	-0.101623				R2	EC:1.14.13.1	0.874137	NA	-1				R4	EC:1.14.11.1	0.568461	0.998145	-0.851852
BL	EC:1.16.1.3	0.579702	0.996109	Inf				R2	EC:1.14.13.107	0.518992	NA	-1				R4	EC:1.14.11.17	0.855411	0.998145	-0.994095
BL	EC:1.16.1.9	0.579702	0.996109	Inf				R2	EC:1.14.13.114	1	NA	-1				R4	EC:1.14.11.2	0.656908	0.998145	15.6667
BL	EC:1.16.3.1	0.697561	0.996109	-0.176135				R2	EC:1.14.13.127	0.566325	NA	-0.960784				R4	EC:1.14.11.33	0.92752	0.998145	-0.998996
BL	EC:1.16.3.2	0.645038	0.996109	-0.115687				R2	EC:1.14.13.129	0.696102	NA	-0.666667				R4	EC:1.14.11.47	0.92752	0.998145	-0.999157
BL	EC:1.17.1.1	0.8416	0.996109	0.5				R2	EC:1.14.13.131	1	NA	-1				R4	EC:1.14.12.10	1	NA	-1
BL	EC:1.17.1.2	0.635906	0.996109	-0.142984				R2	EC:1.14.13.141	1	NA	-1				R4	EC:1.14.12.17	0.720077	0.998145	-0.997987
BL	EC:1.17.1.4	0.40644	0.996109	-0.332293				R2	EC:1.14.13.142	1	NA	-1				R4	EC:1.14.12.19	1	NA	-1
BL	EC:1.17.1.8	0.723006	0.996109	-0.152346				R2	EC:1.14.13.148	1	NA	-1				R4	EC:1.14.13.1	1	NA	-1
BL	EC:1.17.2.1	0.985806	0.996944	0				R2	EC:1.14.13.149	0.845278	NA	-0.875				R4	EC:1.14.13.113	1	NA	-1
BL	EC:1.17.4.1	0.910213	0.996109	-0.155685				R2	EC:1.14.13.165	0.845278	NA	-0.916667				R4	EC:1.14.13.114	0.576881	0.998145	-0.84127
BL	EC:1.17.4.2	0.614333	0.996109	-0.174247				R2	EC:1.14.13.2	0.945813	NA	-0.925926				R4	EC:1.14.13.127	0.771345	0.998145	-0.994475
BL	EC:1.17.7.1	0.123701	0.996109	-0.139392				R2	EC:1.14.13.22	1	NA	-1				R4	EC:1.14.13.129	0.755139	0.998145	Inf
BL	EC:1.17.7.3	0.123701	0.996109	-0.139392				R2	EC:1.14.13.59	1	NA	-1				R4	EC:1.14.13.131	0.576881	0.998145	-0.84127
BL	EC:1.17.99.6	0.991314	0.997622	-0.163066				R2	EC:1.14.13.70	0.518992	NA	-1				R4	EC:1.14.13.142	1	NA	-1
BL	EC:1.18.1.1	0.878172	0.996109	-1				R2	EC:1.14.13.82	0.945813	NA	-0.967213				R4	EC:1.14.13.148	0.92752	0.998145	-0.959596
BL	EC:1.18.1.2	0.122564	0.996109	-0.139441				R2	EC:1.14.13.83	1	NA	-1				R4	EC:1.14.13.149	0.822795	0.998145	-0.996142
BL	EC:1.18.1.3	0.878172	0.996109	-1				R2	EC:1.14.13.84	0.518992	NA	-1				R4	EC:1.14.13.165	1	NA	-1
BL	EC:1.18.6.1	0.390914	0.996109	-0.314338				R2	EC:1.14.14.1	0.518992	NA	-1				R4	EC:1.14.13.2	0.591895	0.998145	-0.921198
BL	EC:1.2.1.10	0.576126	0.996109	-0.205336				R2	EC:1.14.14.12	1	NA	-1				R4	EC:1.14.13.22	1	NA	-1
BL	EC:1.2.1.11	0.125199	0.996109	-0.139466				R2	EC:1.14.14.5	0.682969	NA	-0.989362				R4	EC:1.14.13.40	1	NA	-1
BL	EC:1.2.1.12	0.126081	0.996109	-0.133677				R2	EC:1.14.14.9	0.08646	0.221879	-0.419136				R4	EC:1.14.13.59	0.990628	0.998145	-0.934641
BL	EC:1.2.1.16	0.251862	0.996109	-0.362195				R2	EC:1.14.15.3	1	NA	-1				R4	EC:1.14.13.82	0.836329	0.998145	-0.957895
BL	EC:1.2.1.18	0.813452	0.996109	-0.254902				R2	EC:1.14.15.7	0.708194	NA	-1				R4	EC:1.14.13.83	0.92752	0.998145	-0.989265
BL	EC:1.2.1.19	0.872518	0.996109	-0.5				R2	EC:1.14.16.1	0.945813	NA	-0.909091				R4	EC:1.14.13.9	1	NA	-1
BL	EC:1.2.1.2	0.950574	0.996109	-0.0553633				R2	EC:1.14.19.1	0.585401	NA	-0.538462				R4	EC:1.14.14.12	1	NA	-1
BL	EC:1.2.1.20	0.25528	0.996109	-0.363081				R2	EC:1.14.19.2	1	NA	-1				R4	EC:1.14.14.5	0.905352	0.998145	-0.996083
BL	EC:1.2.1.21	0.579702	0.996109	Inf				R2	EC:1.14.19.3	0.615012	NA	-1				R4	EC:1.14.14.9	0.175532	0.903833	-0.499819
BL	EC:1.2.1.22	0.579702	0.996109	Inf				R2	EC:1.14.19.9	0.642783	NA	-0.238095				R4	EC:1.14.15.3	0.92752	0.998145	-0.98645
BL	EC:1.2.1.24	0.934316	0.996109	0				R2	EC:1.14.99.48	1	NA	-1				R4	EC:1.14.15.7	0.984308	0.998145	-1
BL	EC:1.2.1.27	0.813452	0.996109	-0.254902				R2	EC:1.14.99.50	0.518992	NA	-1				R4	EC:1.14.16.1	0.591895	0.998145	-0.970131
BL	EC:1.2.1.28	0.878172	0.996109	-1				R2	EC:1.15.1.1	0.676126	0.778253	0.125732				R4	EC:1.14.19.1	1	NA	-1
BL	EC:1.2.1.3	0.449134	0.996109	-0.106636				R2	EC:1.15.1.2	0.0267757	0.137057	0.349515				R4	EC:1.14.19.2	1	NA	-1
BL	EC:1.2.1.38	0.563345	0.996109	-0.150335				R2	EC:1.16.1.1	0.74314	NA	-0.5				R4	EC:1.14.19.3	0.822795	0.998145	-0.999529
BL	EC:1.2.1.39	0.697284	0.996109	-1				R2	EC:1.16.1.3	0.615012	NA	-1				R4	EC:1.14.19.9	0.477037	0.998145	Inf
BL	EC:1.2.1.4	0.697284	0.996109	-1				R2	EC:1.16.1.9	0.615012	NA	-1				R4	EC:1.14.99.46	1	NA	-1
BL	EC:1.2.1.41	0.328589	0.996109	-0.116953				R2	EC:1.16.3.1	0.184265	0.344968	0.0111559				R4	EC:1.14.99.48	1	NA	-1
BL	EC:1.2.1.46	0.878172	0.996109	-1				R2	EC:1.16.3.2	0.0717998	0.210083	-0.134467				R4	EC:1.14.99.50	1	NA	-1
BL	EC:1.2.1.54	0.8416	0.996109	0.5				R2	EC:1.17.1.1	1	NA	-1				R4	EC:1.15.1.1	0.990149	0.998145	-0.163541
BL	EC:1.2.1.58	0.513632	0.996109	0.2				R2	EC:1.17.1.2	0.00405798	0.0714205	0.236681				R4	EC:1.15.1.2	0.863064	0.998145	-0.136996
BL	EC:1.2.1.60	0.878172	0.996109	-1				R2	EC:1.17.1.4	0.0436389	0.172148	-0.316889				R4	EC:1.16.1.1	0.755139	0.998145	-0.979424
BL	EC:1.2.1.68	0.623702	0.996109	2				R2	EC:1.17.1.8	0.952663	0.966662	0.125229				R4	EC:1.16.1.3	1	NA	-1
BL	EC:1.2.1.70	0.756761	0.996109	-0.19144				R2	EC:1.17.2.1	1	NA	-1				R4	EC:1.16.1.9	1	NA	-1
BL	EC:1.2.1.71	0.503422	0.996109	2.5				R2	EC:1.17.4.1	0.0151258	0.0994933	-0.110267				R4	EC:1.16.3.1	0.619038	0.998145	-0.192876
BL	EC:1.2.1.72	0.503422	0.996109	2.5				R2	EC:1.17.4.2	0.862282	0.909843	0.131528				R4	EC:1.16.3.2	0.751469	0.998145	-0.106415
BL	EC:1.2.1.76	0.133172	0.996109	0.350975				R2	EC:1.17.7.1	0.0147136	0.0994933	0.162514				R4	EC:1.17.1.1	0.92752	0.998145	-0.991646
BL	EC:1.2.1.79	0.25528	0.996109	-0.363081				R2	EC:1.17.7.3	0.0147136	0.0994933	0.162514				R4	EC:1.17.1.2	0.0536188	0.903833	-0.107938
BL	EC:1.2.1.8	0.792607	0.996109	0.75				R2	EC:1.17.99.1	0.874137	NA	-1				R4	EC:1.17.1.4	0.0514283	0.903833	-0.500741
BL	EC:1.2.1.87	0.985515	0.996944	-0.176259				R2	EC:1.17.99.6	0.109902	0.246524	-0.145034				R4	EC:1.17.1.8	0.804747	0.998145	-0.153804
BL	EC:1.2.1.88	0.248453	0.996109	-0.513246				R2	EC:1.18.1.1	1	NA	-1				R4	EC:1.17.2.1	0.946022	0.998145	-0.808429
BL	EC:1.2.1.9	0.650355	0.996109	0.184028				R2	EC:1.18.1.2	0.0148074	0.0994933	0.162813				R4	EC:1.17.4.1	0.167837	0.903833	-0.260338
BL	EC:1.2.3.3	0.328408	0.996109	-0.379182				R2	EC:1.18.1.3	0.945813	NA	-0.954545				R4	EC:1.17.4.2	0.583402	0.998145	-0.172603
BL	EC:1.2.4.1	0.954629	0.996109	-0.190967				R2	EC:1.18.6.1	0.911102	0.93901	0.107238				R4	EC:1.17.7.1	0.233694	0.953217	-0.13214
BL	EC:1.2.4.2	0.263207	0.996109	5.5				R2	EC:1.2.1.10	9.14053e-05	0.00871397	-0.142529				R4	EC:1.17.7.3	0.233694	0.953217	-0.13214
BL	EC:1.2.4.4	0.621515	0.996109	-0.833333				R2	EC:1.2.1.11	0.0146398	0.0994933	0.162553				R4	EC:1.17.99.6	0.964228	0.998145	-0.135088
BL	EC:1.2.5.1	0.473265	0.996109	3				R2	EC:1.2.1.12	0.204851	0.358365	0.15597				R4	EC:1.18.1.1	0.92752	0.998145	-0.993056
BL	EC:1.2.7.1	0.588944	0.996109	-0.125605				R2	EC:1.2.1.16	0.001154	0.0419576	-0.933634				R4	EC:1.18.1.2	0.189825	0.923691	-0.124561
BL	EC:1.2.7.11	0.490395	0.996109	-0.111318				R2	EC:1.2.1.18	0.537857	0.662334	-0.419672				R4	EC:1.18.1.3	0.591895	0.998145	-0.89899
BL	EC:1.2.7.3	0.342949	0.996109	-0.0982154				R2	EC:1.2.1.19	0.615012	NA	-1				R4	EC:1.18.6.1	0.695112	0.998145	-0.21392
BL	EC:1.2.7.4	0.866092	0.996109	-0.245583				R2	EC:1.2.1.2	0.197869	0.354458	-0.211055				R4	EC:1.2.1.10	0.000622769	0.309101	-0.386641
BL	EC:1.2.7.5	0.681392	0.996109	0.0384615				R2	EC:1.2.1.20	0.00120206	0.0419576	-0.933168				R4	EC:1.2.1.11	0.233199	0.953217	-0.132471
BL	EC:1.2.7.8	0.141913	0.996109	-0.270736				R2	EC:1.2.1.21	0.560311	NA	-1				R4	EC:1.2.1.12	0.575468	0.998145	-0.142981
BL	EC:1.2.99.2	0.425094	0.996109	-0.25015				R2	EC:1.2.1.22	0.560311	NA	-1				R4	EC:1.2.1.16	0.543649	0.998145	-0.707941
BL	EC:1.2.99.5	0.908089	0.996109	-0.0217391				R2	EC:1.2.1.24	0.615012	NA	-1				R4	EC:1.2.1.18	0.207366	0.941367	-0.77131
BL	EC:1.20.1.1	0.878172	0.996109	-1				R2	EC:1.2.1.27	0.537857	0.662334	-0.419672				R4	EC:1.2.1.19	0.946022	0.998145	-0.997466
BL	EC:1.20.4.1	0.0802893	0.996109	-0.133726				R2	EC:1.2.1.28	1	NA	-1				R4	EC:1.2.1.2	0.871213	0.998145	-0.856782
BL	EC:1.20.4.3	0.750396	0.996109	Inf				R2	EC:1.2.1.3	0.512959	0.649143	0.109784				R4	EC:1.2.1.20	0.542636	0.998145	-0.551016
BL	EC:1.21.4.1	0.292185	0.996109	-0.34299				R2	EC:1.2.1.32	0.518992	NA	-1				R4	EC:1.2.1.21	1	NA	-1
BL	EC:1.21.4.2	0.0206358	0.996109	-0.373746				R2	EC:1.2.1.38	0.00284708	0.0638638	0.185667				R4	EC:1.2.1.22	1	NA	-1
BL	EC:1.21.4.4	0.10893	0.996109	-0.408585				R2	EC:1.2.1.39	1	NA	-1				R4	EC:1.2.1.24	0.92752	0.998145	-0.998969
BL	EC:1.21.98.1	0.908415	0.996109	-0.19527				R2	EC:1.2.1.4	0.945813	NA	-0.95				R4	EC:1.2.1.27	0.207366	0.941367	-0.77131
BL	EC:1.3.1.1	0.830065	0.996109	-0.238368				R2	EC:1.2.1.41	0.692606	0.794726	0.163383				R4	EC:1.2.1.28	0.92752	0.998145	-0.987005
BL	EC:1.3.1.10	0.888574	0.996109	-0.17768				R2	EC:1.2.1.43	0.614741	NA	-1				R4	EC:1.2.1.3	0.999308	0.999757	-0.139811
BL	EC:1.3.1.106	0.779788	0.996109	-0.22476				R2	EC:1.2.1.46	1	NA	-1				R4	EC:1.2.1.38	0.0230012	0.903833	-0.114089
BL	EC:1.3.1.12	0.943781	0.996109	-0.162927				R2	EC:1.2.1.5	0.518992	NA	-1				R4	EC:1.2.1.39	0.862073	0.998145	-0.985185
BL	EC:1.3.1.14	0.149334	0.996109	-0.116882				R2	EC:1.2.1.54	1	NA	-1				R4	EC:1.2.1.4	0.739552	0.998145	-0.939668
BL	EC:1.3.1.22	0.609595	0.996109	-0.022987				R2	EC:1.2.1.58	0.744541	0.829362	0.263158				R4	EC:1.2.1.41	0.363253	0.998145	-0.130428
BL	EC:1.3.1.28	0.579702	0.996109	Inf				R2	EC:1.2.1.60	1	NA	-1				R4	EC:1.2.1.43	1	NA	-1
BL	EC:1.3.1.31	0.327828	0.996109	-0.425098				R2	EC:1.2.1.68	0.945813	NA	-0.916667				R4	EC:1.2.1.46	0.92752	0.998145	-0.98916
BL	EC:1.3.1.34	0.444269	0.996109	-0.375333				R2	EC:1.2.1.70	0.0173948	0.107742	0.815825				R4	EC:1.2.1.5	1	NA	-1
BL	EC:1.3.1.44	0.828889	0.996109	0.269231				R2	EC:1.2.1.71	0.281913	0.441188	-0.916667				R4	EC:1.2.1.54	0.92752	0.998145	-0.98999
BL	EC:1.3.1.54	0.779788	0.996109	-0.22476				R2	EC:1.2.1.72	0.615012	NA	-1				R4	EC:1.2.1.58	0.620151	0.998145	-0.462366
BL	EC:1.3.1.76	0.0668753	0.996109	-0.248204				R2	EC:1.2.1.76	0.0463037	0.177756	1.31329				R4	EC:1.2.1.60	0.92752	0.998145	-0.977553
BL	EC:1.3.1.9	0.738267	0.996109	-0.149099				R2	EC:1.2.1.79	0.00120206	0.0419576	-0.933168				R4	EC:1.2.1.68	0.591895	0.998145	-0.974632
BL	EC:1.3.1.98	0.164621	0.996109	-0.14064				R2	EC:1.2.1.8	0.845278	NA	-0.970149				R4	EC:1.2.1.70	0.639523	0.998145	-0.108124
BL	EC:1.3.3.11	0.934316	0.996109	0				R2	EC:1.2.1.85	0.518992	NA	-1				R4	EC:1.2.1.71	0.591895	0.998145	-0.995429
BL	EC:1.3.3.3	0.277737	0.996109	4.5				R2	EC:1.2.1.87	0.451988	0.620089	0.394022				R4	EC:1.2.1.72	0.92752	0.998145	-0.999067
BL	EC:1.3.3.4	0.924229	0.996109	-0.2				R2	EC:1.2.1.88	0.680055	0.781893	0.278322				R4	EC:1.2.1.76	0.0857039	0.903833	0.303009
BL	EC:1.3.3.6	0.934316	0.996109	0				R2	EC:1.2.1.9	0.654346	0.763848	0.270916				R4	EC:1.2.1.79	0.542636	0.998145	-0.551016
BL	EC:1.3.4.1	0.353689	0.996109	0.230769				R2	EC:1.2.1.91	0.518992	NA	-1				R4	EC:1.2.1.8	0.946022	0.998145	-0.99015
BL	EC:1.3.5.1	0.806354	0.996109	-0.184523				R2	EC:1.2.3.3	0.00599593	0.0779922	-0.926581				R4	EC:1.2.1.87	0.49695	0.998145	-0.84381
BL	EC:1.3.5.2	0.910873	0.996109	-0.194871				R2	EC:1.2.4.1	0.119061	0.257965	0.537332				R4	EC:1.2.1.88	0.497246	0.998145	-0.306125
BL	EC:1.3.5.3	0.866117	0.996109	-0.285714				R2	EC:1.2.4.2	0.789835	0.866821	-0.727273				R4	EC:1.2.1.9	0.499924	0.998145	-0.419971
BL	EC:1.3.5.4	0.773088	0.996109	-0.187614				R2	EC:1.2.4.4	0.87147	NA	-0.772152				R4	EC:1.2.1.91	1	NA	-1
BL	EC:1.3.8.1	0.41329	0.996109	-0.0868273				R2	EC:1.2.5.1	0.656983	NA	-0.957447				R4	EC:1.2.3.3	0.442032	0.998145	0.527448
BL	EC:1.3.8.4	0.878172	0.996109	2.5				R2	EC:1.2.7.1	0.0742847	0.214636	0.351264				R4	EC:1.2.4.1	0.76629	0.998145	-0.175399
BL	EC:1.3.8.6	0.934316	0.996109	0				R2	EC:1.2.7.11	0.190817	0.347116	-0.0398616				R4	EC:1.2.4.2	0.339162	0.998145	-0.993762
BL	EC:1.3.8.7	0.939007	0.996109	0.125				R2	EC:1.2.7.3	0.190853	0.347116	-0.0372057				R4	EC:1.2.4.4	0.547609	0.998145	-0.972419
BL	EC:1.3.98.1	0.87164	0.996109	-0.200338				R2	EC:1.2.7.4	0.0806989	0.221879	-0.387007				R4	EC:1.2.5.1	0.912081	0.998145	-0.998629
BL	EC:1.3.99.16	1	NA	-1				R2	EC:1.2.7.5	0.101285	0.233609	1.30435				R4	EC:1.2.7.1	0.447287	0.998145	-0.101746
BL	EC:1.3.99.22	0.976242	0.996944	-0.157747				R2	EC:1.2.7.8	0.733058	0.823312	0.0697033				R4	EC:1.2.7.11	0.803195	0.998145	-0.105268
BL	EC:1.3.99.23	0.971732	0.996944	-1				R2	EC:1.2.98.1	0.518992	NA	-1				R4	EC:1.2.7.3	0.811038	0.998145	-0.113394
BL	EC:1.3.99.26	0.371404	0.996109	-0.945946				R2	EC:1.2.99.2	0.129968	0.274832	-0.112048				R4	EC:1.2.7.4	0.305428	0.998145	-0.419204
BL	EC:1.3.99.28	0.371404	0.996109	-0.945946				R2	EC:1.2.99.5	0.172671	0.331435	1.1				R4	EC:1.2.7.5	0.231452	0.953217	-0.529412
BL	EC:1.3.99.29	0.371404	0.996109	-0.945946				R2	EC:1.20.1.1	1	NA	-1				R4	EC:1.2.7.8	0.188826	0.921844	-0.214065
BL	EC:1.3.99.31	0.371404	0.996109	-0.945946				R2	EC:1.20.4.1	0.932794	0.957055	0.128638				R4	EC:1.2.99.2	0.0846132	0.903833	-0.371684
BL	EC:1.3.99.33	0.353689	0.996109	0.230769				R2	EC:1.20.4.3	1	NA	-1				R4	EC:1.2.99.5	0.301965	0.998145	-0.482759
BL	EC:1.3.99.4	0.662859	0.996109	Inf				R2	EC:1.21.4.1	0.148863	0.299295	0.565996				R4	EC:1.2.99.7	1	NA	-1
BL	EC:1.3.99.5	0.662859	0.996109	Inf				R2	EC:1.21.4.2	0.525316	0.653615	0.0293139				R4	EC:1.20.1.1	0.92752	0.998145	-0.968254
BL	EC:1.4.1.1	0.917482	0.996109	-0.119953				R2	EC:1.21.4.4	0.0948087	0.228339	-0.265953				R4	EC:1.20.4.1	0.584027	0.998145	-0.141868
BL	EC:1.4.1.11	0.962508	0.996944	-0.076087				R2	EC:1.21.98.1	0.524526	0.653615	0.210456				R4	EC:1.20.4.3	1	NA	-1
BL	EC:1.4.1.13	0.639262	0.996109	-0.14131				R2	EC:1.3.1.1	0.0349417	0.157375	0.526085				R4	EC:1.21.4.1	0.698511	0.998145	-0.229749
BL	EC:1.4.1.14	0.639262	0.996109	-0.14131				R2	EC:1.3.1.10	0.202008	0.355867	-0.0977664				R4	EC:1.21.4.2	0.0125571	0.903833	-0.394051
BL	EC:1.4.1.16	0.599884	0.996109	-0.182016				R2	EC:1.3.1.104	1	NA	-1				R4	EC:1.21.4.4	0.0717028	0.903833	-0.458175
BL	EC:1.4.1.2	0.658853	0.996109	0.0833333				R2	EC:1.3.1.106	0.0595506	0.192991	-0.0955749				R4	EC:1.21.98.1	0.963728	0.998145	-0.0836796
BL	EC:1.4.1.21	0.371375	0.996109	-0.409419				R2	EC:1.3.1.12	0.00427115	0.0729284	0.333143				R4	EC:1.3.1.1	0.948153	0.998145	-0.291662
BL	EC:1.4.1.3	0.834031	0.996109	-0.188811				R2	EC:1.3.1.14	0.0334154	0.1523	0.228876				R4	EC:1.3.1.10	0.91343	0.998145	-0.12276
BL	EC:1.4.1.4	0.393652	0.996109	-0.132722				R2	EC:1.3.1.22	0.0536197	0.181857	-0.472639				R4	EC:1.3.1.104	1	NA	-1
BL	EC:1.4.1.9	0.8416	0.996109	0.5				R2	EC:1.3.1.25	0.518992	NA	-1				R4	EC:1.3.1.106	0.0652509	0.903833	-0.374321
BL	EC:1.4.3.16	0.625876	0.996109	-0.187343				R2	EC:1.3.1.28	0.390201	NA	-1				R4	EC:1.3.1.12	0.943901	0.998145	-0.141442
BL	EC:1.4.3.19	0.934316	0.996109	0				R2	EC:1.3.1.31	0.0758314	0.217395	-0.405886				R4	EC:1.3.1.14	0.150436	0.903833	-0.110586
BL	EC:1.4.3.4	0.878172	0.996109	-1				R2	EC:1.3.1.34	0.0883773	0.221879	-0.351109				R4	EC:1.3.1.22	0.743257	0.998145	-0.097142
BL	EC:1.4.3.5	0.771696	0.996109	0.222222				R2	EC:1.3.1.43	0.657473	NA	-1				R4	EC:1.3.1.25	1	NA	-1
BL	EC:1.4.4.2	0.891852	0.996109	-0.167945				R2	EC:1.3.1.44	0.285283	0.443847	-0.969388				R4	EC:1.3.1.28	1	NA	-1
BL	EC:1.4.7.1	0.709061	0.996109	-0.202869				R2	EC:1.3.1.54	0.0595506	0.192991	-0.0955749				R4	EC:1.3.1.31	0.177645	0.903833	-0.488892
BL	EC:1.4.99.6	0.878172	0.996109	-1				R2	EC:1.3.1.64	0.874137	NA	-1				R4	EC:1.3.1.34	0.0563059	0.903833	-0.584778
BL	EC:1.5.1.2	0.825091	0.996109	-0.153748				R2	EC:1.3.1.76	0.0689728	0.20681	0.376997				R4	EC:1.3.1.43	1	NA	Inf
BL	EC:1.5.1.20	0.99907	0.99907	-0.153965				R2	EC:1.3.1.85	0.845278	NA	Inf				R4	EC:1.3.1.44	0.449083	0.998145	-0.957806
BL	EC:1.5.1.21	0.878172	0.996109	-1				R2	EC:1.3.1.9	0.157744	0.310328	0.176002				R4	EC:1.3.1.54	0.0652509	0.903833	-0.374321
BL	EC:1.5.1.24	0.841272	0.996109	Inf				R2	EC:1.3.1.98	0.455556	0.620089	0.137911				R4	EC:1.3.1.76	0.947076	0.998145	-0.163476
BL	EC:1.5.1.28	0.516272	0.996109	-0.037037				R2	EC:1.3.3.11	1	NA	-1				R4	EC:1.3.1.86	1	NA	-1
BL	EC:1.5.1.3	0.211697	0.996109	-0.187495				R2	EC:1.3.3.3	0.20878	0.362434	-0.6875				R4	EC:1.3.1.87	1	NA	-1
BL	EC:1.5.1.34	0.502019	0.996109	Inf				R2	EC:1.3.3.4	0.998961	NA	-0.851852				R4	EC:1.3.1.9	0.684181	0.998145	-0.127004
BL	EC:1.5.1.38	0.960617	0.996944	-0.142411				R2	EC:1.3.3.6	1	NA	-1				R4	EC:1.3.1.98	0.136318	0.903833	-0.12437
BL	EC:1.5.1.39	0.558389	0.996109	-0.068511				R2	EC:1.3.4.1	0.366809	0.535925	-0.388889				R4	EC:1.3.3.11	0.92752	0.998145	-0.991486
BL	EC:1.5.1.41	0.579702	0.996109	Inf				R2	EC:1.3.5.1	0.135434	0.282474	-0.121722				R4	EC:1.3.3.3	0.458822	0.998145	-0.993928
BL	EC:1.5.1.5	0.191643	0.996109	-0.141463				R2	EC:1.3.5.2	0.530384	0.656666	0.208169				R4	EC:1.3.3.4	0.263641	0.985868	-0.958848
BL	EC:1.5.1.7	0.20586	0.996109	0.0503807				R2	EC:1.3.5.3	0.538978	0.663001	0.353659				R4	EC:1.3.3.6	0.92752	0.998145	-0.91453
BL	EC:1.5.3.1	0.750396	0.996109	-0.888889				R2	EC:1.3.5.4	0.0925675	0.224957	-0.133149				R4	EC:1.3.4.1	0.434952	0.998145	-0.359699
BL	EC:1.5.5.1	0.755983	0.996109	1				R2	EC:1.3.8.1	0.0280349	0.141859	0.373298				R4	EC:1.3.5.1	0.838556	0.998145	-0.162342
BL	EC:1.5.5.2	0.437878	0.996109	3.5				R2	EC:1.3.8.12	0.845278	NA	Inf				R4	EC:1.3.5.2	0.761481	0.998145	-0.167695
BL	EC:1.6.1.1	0.503422	0.996109	2.5				R2	EC:1.3.8.4	0.945813	NA	-0.909091				R4	EC:1.3.5.3	0.182102	0.903833	-0.939124
BL	EC:1.6.1.2	0.633295	0.996109	0.166486				R2	EC:1.3.8.6	0.945813	NA	-0.958333				R4	EC:1.3.5.4	0.827703	0.998145	-0.167165
BL	EC:1.6.5.2	0.840037	0.996109	-0.0245098				R2	EC:1.3.8.7	0.989815	NA	-0.954955				R4	EC:1.3.8.1	0.999129	0.999757	-0.166445
BL	EC:1.6.5.3	0.991307	0.997622	-0.15632				R2	EC:1.3.8.8	1	NA	-1				R4	EC:1.3.8.4	0.591895	0.998145	-0.971871
BL	EC:1.6.5.5	0.582645	0.996109	2				R2	EC:1.3.98.1	0.900453	0.931417	0.0705409				R4	EC:1.3.8.6	0.591895	0.998145	-0.972633
BL	EC:1.6.99.3	0.992809	0.997622	-0.160883				R2	EC:1.3.99.16	0.83913	NA	-0.95				R4	EC:1.3.8.7	0.736735	0.998145	-0.9747
BL	EC:1.7.1.13	0.952329	0.996109	-0.156859				R2	EC:1.3.99.22	0.0214972	0.123582	0.238994				R4	EC:1.3.8.8	1	NA	-1
BL	EC:1.7.1.15	0.294229	0.996109	4				R2	EC:1.3.99.26	0.277982	0.436969	-0.992958				R4	EC:1.3.98.1	0.992343	0.998145	-0.0981244
BL	EC:1.7.1.7	0.241772	0.996109	-0.370186				R2	EC:1.3.99.28	0.277982	0.436969	-0.992958				R4	EC:1.3.99.16	0.622594	0.998145	-0.910691
BL	EC:1.7.2.1	0.878172	0.996109	-1				R2	EC:1.3.99.29	0.277982	0.436969	-0.992958				R4	EC:1.3.99.22	0.578357	0.998145	-0.140672
BL	EC:1.7.2.2	0.715187	0.996109	-0.0166667				R2	EC:1.3.99.31	0.277982	0.436969	-0.992958				R4	EC:1.3.99.23	0.569599	0.998145	-1
BL	EC:1.7.2.3	0.34416	0.996109	Inf				R2	EC:1.3.99.33	0.366809	0.535925	-0.388889				R4	EC:1.3.99.26	0.847782	0.998145	-0.975634
BL	EC:1.7.2.4	0.878172	0.996109	-1				R2	EC:1.3.99.4	1	NA	-1				R4	EC:1.3.99.28	0.847782	0.998145	-0.975634
BL	EC:1.7.2.5	0.8416	0.996109	0.5				R2	EC:1.3.99.5	1	NA	-1				R4	EC:1.3.99.29	0.847782	0.998145	-0.975634
BL	EC:1.7.7.1	0.88015	0.996109	-0.236234				R2	EC:1.4.1.1	0.0151387	0.0994933	-0.272864				R4	EC:1.3.99.31	0.847782	0.998145	-0.975634
BL	EC:1.7.99.1	0.269718	0.996109	-0.0865069				R2	EC:1.4.1.11	0.0377694	0.162437	0.108696				R4	EC:1.3.99.33	0.347111	0.998145	-0.848282
BL	EC:1.7.99.4	0.303957	0.996109	-0.452476				R2	EC:1.4.1.13	0.101082	0.233609	0.057203				R4	EC:1.3.99.4	1	NA	-1
BL	EC:1.8.1.2	0.664477	0.996109	1				R2	EC:1.4.1.14	0.101082	0.233609	0.057203				R4	EC:1.3.99.5	1	NA	-1
BL	EC:1.8.1.4	0.566483	0.996109	-0.184241				R2	EC:1.4.1.16	0.59065	0.708417	0.0802183				R4	EC:1.4.1.1	0.934305	0.998145	-0.119477
BL	EC:1.8.1.7	0.243607	0.996109	-0.378049				R2	EC:1.4.1.18	0.845278	NA	Inf				R4	EC:1.4.1.11	0.735192	0.998145	-0.324495
BL	EC:1.8.1.8	0.639422	0.996109	-0.113562				R2	EC:1.4.1.2	0.832335	0.892542	-0.294118				R4	EC:1.4.1.13	0.729852	0.998145	-0.15406
BL	EC:1.8.1.9	0.898134	0.996109	-0.149531				R2	EC:1.4.1.20	0.845278	NA	Inf				R4	EC:1.4.1.14	0.729852	0.998145	-0.15406
BL	EC:1.8.4.11	0.622085	0.996109	-0.136572				R2	EC:1.4.1.21	0.0855914	0.221879	-0.418498				R4	EC:1.4.1.16	0.411494	0.998145	-0.121792
BL	EC:1.8.4.12	0.605744	0.996109	-0.131287				R2	EC:1.4.1.23	0.518992	NA	-1				R4	EC:1.4.1.18	1	NA	-1
BL	EC:1.8.4.8	0.146839	0.996109	-0.469873				R2	EC:1.4.1.3	0.186116	0.346206	-0.025641				R4	EC:1.4.1.2	0.161008	0.903833	-0.749104
BL	EC:1.8.5.3	0.282557	0.996109	0.214765				R2	EC:1.4.1.4	0.58545	0.703524	0.0967552				R4	EC:1.4.1.21	0.133676	0.903833	-0.525884
BL	EC:1.8.7.1	0.750396	0.996109	Inf				R2	EC:1.4.1.9	0.936597	NA	-0.878788				R4	EC:1.4.1.23	1	NA	-1
BL	EC:1.8.98.1	0.90936	0.996109	-0.194116				R2	EC:1.4.3.10	0.518992	NA	-1				R4	EC:1.4.1.3	0.291524	0.998145	-0.587985
BL	EC:1.8.99.2	0.344543	0.996109	2.2				R2	EC:1.4.3.16	0.12169	0.261178	0.00724181				R4	EC:1.4.1.4	0.365416	0.998145	-0.111332
BL	EC:1.9.3.1	0.185682	0.996109	-0.499438				R2	EC:1.4.3.19	0.845278	NA	-0.965517				R4	EC:1.4.1.9	0.591895	0.998145	-0.980088
BL	EC:1.97.1.4	0.885931	0.996109	-0.162639				R2	EC:1.4.3.21	0.518992	NA	-1				R4	EC:1.4.3.16	0.812278	0.998145	-0.1671
BL	EC:1.97.1.9	0.771675	0.996109	-0.223589				R2	EC:1.4.3.4	0.224399	0.379192	-0.875				R4	EC:1.4.3.19	0.92752	0.998145	-0.992175
BL	EC:2.1.1.10	0.752633	0.996109	-0.267732				R2	EC:1.4.3.5	0.988346	0.990077	-0.692308				R4	EC:1.4.3.21	1	NA	-1
BL	EC:2.1.1.104	0.662859	0.996109	Inf				R2	EC:1.4.4.2	0.0474619	0.17832	-0.223463				R4	EC:1.4.3.4	0.903699	0.998145	-0.822222
BL	EC:2.1.1.107	0.472073	0.996109	-0.194822				R2	EC:1.4.7.1	0.0289357	0.141859	0.447125				R4	EC:1.4.3.5	0.760239	0.998145	-0.993155
BL	EC:2.1.1.113	0.750396	0.996109	Inf				R2	EC:1.4.9.1	0.708194	NA	-1				R4	EC:1.4.4.2	0.779464	0.998145	-0.181332
BL	EC:2.1.1.13	0.879909	0.996109	-0.160186				R2	EC:1.4.99.6	0.945813	NA	-0.894737				R4	EC:1.4.7.1	0.620215	0.998145	-0.128471
BL	EC:2.1.1.130	0.178803	0.996109	-0.250756				R2	EC:1.5.1.2	0.898466	0.931019	0.123484				R4	EC:1.4.99.5	1	NA	-1
BL	EC:2.1.1.131	0.539933	0.996109	-0.0960235				R2	EC:1.5.1.20	0.820674	0.882379	0.12847				R4	EC:1.4.99.6	0.591895	0.998145	-0.924414
BL	EC:2.1.1.132	0.582637	0.996109	-0.217273				R2	EC:1.5.1.21	1	NA	-1				R4	EC:1.5.1.2	0.824754	0.998145	-0.153321
BL	EC:2.1.1.133	0.523825	0.996109	-0.0941729				R2	EC:1.5.1.24	0.288223	NA	-0.666667				R4	EC:1.5.1.20	0.20149	0.941367	-0.12013
BL	EC:2.1.1.14	0.905605	0.996109	-0.0431894				R2	EC:1.5.1.28	0.187605	0.347054	0.795884				R4	EC:1.5.1.21	0.92752	0.998145	-0.960317
BL	EC:2.1.1.144	0.659098	0.996109	-0.38674				R2	EC:1.5.1.3	0.00842776	0.0809589	0.0645291				R4	EC:1.5.1.24	0.747141	0.998145	-0.444444
BL	EC:2.1.1.148	0.240246	0.996109	0.102682				R2	EC:1.5.1.34	0.499624	NA	-0.7				R4	EC:1.5.1.28	0.743978	0.998145	-0.216654
BL	EC:2.1.1.151	0.178803	0.996109	-0.250756				R2	EC:1.5.1.38	0.00588385	0.0779922	1.24891				R4	EC:1.5.1.3	0.11016	0.903833	-0.17319
BL	EC:2.1.1.152	0.878172	0.996109	-1				R2	EC:1.5.1.39	0.367962	0.536924	-0.0220621				R4	EC:1.5.1.33	1	NA	-1
BL	EC:2.1.1.163	0.87647	0.996109	-0.13677				R2	EC:1.5.1.41	0.615012	NA	-1				R4	EC:1.5.1.34	0.807761	0.998145	-0.999005
BL	EC:2.1.1.166	0.944355	0.996109	-0.277778				R2	EC:1.5.1.5	0.483839	0.621225	0.137201				R4	EC:1.5.1.36	1	NA	-1
BL	EC:2.1.1.170	0.189854	0.996109	-0.141427				R2	EC:1.5.1.7	0.0652127	0.201087	-0.128785				R4	EC:1.5.1.38	0.521672	0.998145	-0.0997911
BL	EC:2.1.1.171	0.993618	0.997622	-0.151725				R2	EC:1.5.3.1	1	NA	-1				R4	EC:1.5.1.39	0.204566	0.941367	0.0105632
BL	EC:2.1.1.172	0.512054	0.996109	0.126225				R2	EC:1.5.5.1	0.936597	NA	-0.84				R4	EC:1.5.1.41	1	NA	-1
BL	EC:2.1.1.173	0.545783	0.996109	0.0847458				R2	EC:1.5.5.2	0.232834	0.390034	-0.878788				R4	EC:1.5.1.5	0.150016	0.903833	-0.125352
BL	EC:2.1.1.174	0.579702	0.996109	Inf				R2	EC:1.6.1.1	0.615012	NA	-1				R4	EC:1.5.1.7	0.159963	0.903833	-0.0351503
BL	EC:2.1.1.176	0.974909	0.996944	-0.156676				R2	EC:1.6.1.2	0.115491	0.255081	-0.524173				R4	EC:1.5.3.1	0.859533	0.998145	-0.97646
BL	EC:2.1.1.177	0.0973261	0.996109	-0.138715				R2	EC:1.6.5.2	0.776117	0.855374	0.263736				R4	EC:1.5.5.1	0.591895	0.998145	-0.972497
BL	EC:2.1.1.178	0.579702	0.996109	Inf				R2	EC:1.6.5.3	0.0420158	0.169845	-0.116684				R4	EC:1.5.5.2	0.784417	0.998145	-0.995349
BL	EC:2.1.1.181	0.503422	0.996109	2.5				R2	EC:1.6.5.5	0.610951	NA	-0.954887				R4	EC:1.5.99.6	1	NA	-1
BL	EC:2.1.1.182	0.189854	0.996109	-0.141427				R2	EC:1.6.99.1	0.709311	NA	Inf				R4	EC:1.6.1.1	0.92752	0.998145	-0.99907
BL	EC:2.1.1.184	0.607749	0.996109	-0.636364				R2	EC:1.6.99.3	0.110519	0.247424	-0.139951				R4	EC:1.6.1.2	0.396508	0.998145	-0.865114
BL	EC:2.1.1.185	0.0782346	0.996109	-0.133419				R2	EC:1.7.1.13	0.024859	0.133515	-0.274099				R4	EC:1.6.5.2	0.234303	0.953217	-0.908117
BL	EC:2.1.1.186	0.755983	0.996109	1				R2	EC:1.7.1.15	0.448253	NA	-0.989474				R4	EC:1.6.5.3	0.992661	0.998145	-0.153013
BL	EC:2.1.1.187	0.0151166	0.996109	0.186298				R2	EC:1.7.1.7	0.00735969	0.0779922	-0.927281				R4	EC:1.6.5.5	0.600999	0.998145	-0.992624
BL	EC:2.1.1.189	0.434223	0.996109	Inf				R2	EC:1.7.2.1	1	NA	-1				R4	EC:1.6.99.1	0.565858	0.998145	-0.873016
BL	EC:2.1.1.190	0.82345	0.996109	-0.145896				R2	EC:1.7.2.2	0.256622	0.419393	-0.301587				R4	EC:1.6.99.3	0.931538	0.998145	-0.14248
BL	EC:2.1.1.191	0.629368	0.996109	-0.140502				R2	EC:1.7.2.3	1	NA	-1				R4	EC:1.7.1.13	0.955104	0.998145	-0.189776
BL	EC:2.1.1.192	0.965687	0.996944	-0.155388				R2	EC:1.7.2.4	1	NA	-1				R4	EC:1.7.1.15	0.617401	0.998145	-0.996104
BL	EC:2.1.1.193	0.622013	0.996109	-0.145449				R2	EC:1.7.2.5	1	NA	-1				R4	EC:1.7.1.7	0.69436	0.998145	-0.443645
BL	EC:2.1.1.195	0.939897	0.996109	-0.150563				R2	EC:1.7.3.3	0.518992	NA	-1				R4	EC:1.7.2.1	0.92752	0.998145	-0.987155
BL	EC:2.1.1.196	0.750396	0.996109	-0.695364				R2	EC:1.7.7.1	0.141018	0.288596	0.509838				R4	EC:1.7.2.2	0.502601	0.998145	-0.97697
BL	EC:2.1.1.197	0.609227	0.996109	-0.022852				R2	EC:1.7.99.1	0.0415966	0.168794	-0.0368783				R4	EC:1.7.2.3	0.911304	0.998145	-1
BL	EC:2.1.1.198	0.422616	0.996109	-0.134428				R2	EC:1.7.99.4	0.0402883	0.168151	-0.470888				R4	EC:1.7.2.4	0.568461	0.998145	-0.851852
BL	EC:2.1.1.199	0.38367	0.996109	-0.167959				R2	EC:1.8.1.14	0.578036	NA	-1				R4	EC:1.7.2.5	0.92752	0.998145	-0.986111
BL	EC:2.1.1.200	0.678313	0.996109	1				R2	EC:1.8.1.15	1	NA	-1				R4	EC:1.7.3.3	1	NA	-1
BL	EC:2.1.1.201	0.87647	0.996109	-0.13677				R2	EC:1.8.1.2	0.469156	0.620089	-0.915789				R4	EC:1.7.7.1	0.290746	0.998145	0.0570785
BL	EC:2.1.1.207	0.660055	0.996109	-0.117254				R2	EC:1.8.1.4	0.0112725	0.090815	-0.0583745				R4	EC:1.7.99.1	0.50666	0.998145	-0.2241
BL	EC:2.1.1.217	0.661534	0.996109	-0.117675				R2	EC:1.8.1.7	0.000355577	0.0214095	-0.92087				R4	EC:1.7.99.4	0.0700889	0.903833	-0.838972
BL	EC:2.1.1.219	0.922553	0.996109	0.375				R2	EC:1.8.1.8	0.188602	0.347054	-0.13122				R4	EC:1.8.1.2	0.810584	0.998145	-0.996068
BL	EC:2.1.1.220	0.922553	0.996109	0.375				R2	EC:1.8.1.9	0.198579	0.354458	0.0875839				R4	EC:1.8.1.4	0.107959	0.903833	-0.251158
BL	EC:2.1.1.222	0.503422	0.996109	2.5				R2	EC:1.8.4.11	0.0473333	0.17832	-0.0470505				R4	EC:1.8.1.7	0.624792	0.998145	-0.481886
BL	EC:2.1.1.223	0.498874	0.996109	-0.185023				R2	EC:1.8.4.12	0.0260264	0.134199	-0.0802798				R4	EC:1.8.1.8	0.854156	0.998145	-0.18954
BL	EC:2.1.1.226	0.985939	0.996944	-0.15589				R2	EC:1.8.4.8	0.269726	0.435382	-0.14891				R4	EC:1.8.1.9	0.386029	0.998145	-0.175499
BL	EC:2.1.1.227	0.985939	0.996944	-0.15589				R2	EC:1.8.5.2	0.845278	NA	-0.9				R4	EC:1.8.2.1	0.984308	0.998145	-1
BL	EC:2.1.1.228	0.258886	0.996109	-0.143393				R2	EC:1.8.5.3	0.284417	0.443288	-0.429487				R4	EC:1.8.2.2	1	NA	-1
BL	EC:2.1.1.242	0.825819	0.996109	0.4				R2	EC:1.8.7.1	1	NA	-1				R4	EC:1.8.2.3	0.640687	0.998145	-1
BL	EC:2.1.1.245	0.165404	0.996109	0.566434				R2	EC:1.8.98.1	0.497098	0.63398	0.216729				R4	EC:1.8.4.11	0.729789	0.998145	-0.160856
BL	EC:2.1.1.246	0.594752	0.996109	0.5				R2	EC:1.8.99.2	0.0414139	0.168794	10.8				R4	EC:1.8.4.12	0.632493	0.998145	-0.180913
BL	EC:2.1.1.258	0.171677	0.996109	0.56338				R2	EC:1.9.3.1	0.626305	0.740179	0.20545				R4	EC:1.8.4.8	0.115726	0.903833	-0.379422
BL	EC:2.1.1.264	0.545783	0.996109	0.0847458				R2	EC:1.97.1.4	0.1853	0.34525	0.197115				R4	EC:1.8.5.2	1	NA	-1
BL	EC:2.1.1.265	0.579702	0.996109	Inf				R2	EC:1.97.1.9	0.0917603	0.224957	-0.139045				R4	EC:1.8.5.3	0.298947	0.998145	-0.942233
BL	EC:2.1.1.266	0.912188	0.996109	0				R2	EC:2.1.1.10	0.0181502	0.109283	1.08132				R4	EC:1.8.7.1	1	NA	-1
BL	EC:2.1.1.271	0.523825	0.996109	-0.0941729				R2	EC:2.1.1.107	0.323529	0.489573	0.240408				R4	EC:1.8.98.1	0.929889	0.998145	-0.0777511
BL	EC:2.1.1.289	0.934316	0.996109	-0.699346				R2	EC:2.1.1.113	0.615012	NA	-1				R4	EC:1.8.99.2	0.372073	0.998145	-0.68254
BL	EC:2.1.1.297	0.155077	0.996109	-0.140135				R2	EC:2.1.1.13	0.0913095	0.224957	0.16711				R4	EC:1.9.3.1	0.79282	0.998145	-0.151188
BL	EC:2.1.1.298	0.825819	0.996109	0.4				R2	EC:2.1.1.130	0.717574	0.81439	0.190359				R4	EC:1.97.1.4	0.914805	0.998145	-0.163847
BL	EC:2.1.1.33	0.153184	0.996109	-0.140308				R2	EC:2.1.1.131	0.0242253	0.13264	0.563548				R4	EC:1.97.1.9	0.0200907	0.903833	-0.513591
BL	EC:2.1.1.34	0.912218	0.996109	-0.194755				R2	EC:2.1.1.132	0.393748	0.565179	0.187219				R4	EC:2.1.1.10	0.36966	0.998145	-0.431689
BL	EC:2.1.1.35	0.825819	0.996109	0.4				R2	EC:2.1.1.133	0.0247146	0.133365	0.559787				R4	EC:2.1.1.104	0.765069	0.998145	-1
BL	EC:2.1.1.37	0.899811	0.996109	-0.150753				R2	EC:2.1.1.14	0.126826	0.269182	-0.156495				R4	EC:2.1.1.107	0.257713	0.981987	-0.251628
BL	EC:2.1.1.45	0.626428	0.996109	-0.139884				R2	EC:2.1.1.144	0.374106	0.543119	-0.354396				R4	EC:2.1.1.113	1	NA	-1
BL	EC:2.1.1.61	0.825819	0.996109	0.4				R2	EC:2.1.1.148	0.0186467	0.110528	0.905307				R4	EC:2.1.1.13	0.0210874	0.903833	-0.114722
BL	EC:2.1.1.63	0.67873	0.996109	-0.167752				R2	EC:2.1.1.151	0.714924	0.812188	0.191455				R4	EC:2.1.1.130	0.530776	0.998145	-0.231541
BL	EC:2.1.1.64	0.503422	0.996109	2.5				R2	EC:2.1.1.152	1	NA	-1				R4	EC:2.1.1.131	0.401505	0.998145	-0.0920381
BL	EC:2.1.1.67	0.8416	0.996109	0.5				R2	EC:2.1.1.163	0.0518612	0.181857	-0.236201				R4	EC:2.1.1.132	0.780686	0.998145	-0.198731
BL	EC:2.1.1.72	0.903494	0.996109	-0.15608				R2	EC:2.1.1.166	0.178343	0.338911	-0.861111				R4	EC:2.1.1.133	0.404722	0.998145	-0.0926939
BL	EC:2.1.1.74	0.0343573	0.996109	0.13272				R2	EC:2.1.1.170	0.477448	0.620089	0.137506				R4	EC:2.1.1.14	0.557839	0.998145	-0.672394
BL	EC:2.1.1.77	0.181575	0.996109	-0.515542				R2	EC:2.1.1.171	0.00251093	0.0598783	0.673272				R4	EC:2.1.1.144	0.979428	0.998145	-0.909968
BL	EC:2.1.1.79	0.302283	0.996109	-0.397651				R2	EC:2.1.1.172	0.0224052	0.125997	-0.40576				R4	EC:2.1.1.148	0.380595	0.998145	-0.0414678
BL	EC:2.1.1.80	0.934426	0.996109	-0.164696				R2	EC:2.1.1.173	0.116392	0.255081	-0.576923				R4	EC:2.1.1.151	0.532397	0.998145	-0.23127
BL	EC:2.1.2.1	0.214421	0.996109	-0.139768				R2	EC:2.1.1.174	0.615012	NA	-1				R4	EC:2.1.1.152	0.92752	0.998145	-0.98916
BL	EC:2.1.2.10	0.670981	0.996109	-0.197635				R2	EC:2.1.1.176	0.0704498	0.207974	0.338747				R4	EC:2.1.1.163	0.738783	0.998145	-0.0968166
BL	EC:2.1.2.11	0.889618	0.996109	-0.154735				R2	EC:2.1.1.177	0.521297	0.653615	0.139868				R4	EC:2.1.1.166	0.62687	0.998145	-0.992272
BL	EC:2.1.2.13	0.851702	0.996109	-0.107198				R2	EC:2.1.1.178	0.615012	NA	-1				R4	EC:2.1.1.170	0.145705	0.903833	-0.124569
BL	EC:2.1.2.2	0.299526	0.996109	-0.122968				R2	EC:2.1.1.181	0.615012	NA	-1				R4	EC:2.1.1.171	0.424367	0.998145	-0.0714035
BL	EC:2.1.2.3	0.125336	0.996109	-0.139501				R2	EC:2.1.1.182	0.477507	0.620089	0.137515				R4	EC:2.1.1.172	0.153057	0.903833	-0.409154
BL	EC:2.1.2.5	0.979421	0.996944	-0.178919				R2	EC:2.1.1.184	0.816674	0.88056	0.666667				R4	EC:2.1.1.173	0.303558	0.998145	-0.979084
BL	EC:2.1.2.9	0.960817	0.996944	-0.156059				R2	EC:2.1.1.185	0.569027	0.689982	0.146621				R4	EC:2.1.1.174	1	NA	-1
BL	EC:2.1.3.11	0.610735	0.996109	-0.0233063				R2	EC:2.1.1.186	0.615012	NA	-1				R4	EC:2.1.1.176	0.75307	0.998145	-0.138225
BL	EC:2.1.3.2	0.13375	0.996109	-0.139667				R2	EC:2.1.1.187	0.22381	0.378755	0.497278				R4	EC:2.1.1.177	0.122918	0.903833	-0.126388
BL	EC:2.1.3.3	0.948174	0.996109	-0.160844				R2	EC:2.1.1.189	0.560311	NA	-1				R4	EC:2.1.1.178	1	NA	-1
BL	EC:2.1.3.6	0.379405	0.996109	0.16				R2	EC:2.1.1.190	0.0317398	0.148205	0.206765				R4	EC:2.1.1.181	0.92752	0.998145	-0.99909
BL	EC:2.1.4.1	0.524826	0.996109	0.138298				R2	EC:2.1.1.191	0.00126208	0.0424548	0.247124				R4	EC:2.1.1.182	0.147607	0.903833	-0.124964
BL	EC:2.10.1.1	0.126664	0.996109	-0.417067				R2	EC:2.1.1.192	0.799384	0.872496	0.120166				R4	EC:2.1.1.184	0.862983	0.998145	-0.376694
BL	EC:2.2.1.1	0.418405	0.996109	-0.190764				R2	EC:2.1.1.193	0.357692	0.526324	0.145793				R4	EC:2.1.1.185	0.307148	0.998145	-0.127632
BL	EC:2.2.1.2	0.0902347	0.996109	-0.278217				R2	EC:2.1.1.195	0.0677598	0.2053	0.375974				R4	EC:2.1.1.186	0.92752	0.998145	-0.999111
BL	EC:2.2.1.6	0.492531	0.996109	-0.179086				R2	EC:2.1.1.196	0.441016	0.615272	-0.99308				R4	EC:2.1.1.187	0.537298	0.998145	-0.234021
BL	EC:2.2.1.7	0.273669	0.996109	-0.145431				R2	EC:2.1.1.197	0.0536218	0.181857	-0.473085				R4	EC:2.1.1.189	1	NA	-1
BL	EC:2.2.1.9	0.607689	0.996109	-0.0225119				R2	EC:2.1.1.198	0.20175	0.355867	0.0591667				R4	EC:2.1.1.190	0.399991	0.998145	-0.119107
BL	EC:2.3.1.1	0.842982	0.996109	-0.170864				R2	EC:2.1.1.199	0.977159	0.982311	0.127855				R4	EC:2.1.1.191	0.293107	0.998145	-0.117923
BL	EC:2.3.1.109	0.737874	0.996109	0.75				R2	EC:2.1.1.200	0.615012	NA	-1				R4	EC:2.1.1.192	0.843594	0.998145	-0.152771
BL	EC:2.3.1.117	0.685708	0.996109	-0.136634				R2	EC:2.1.1.201	0.0518612	0.181857	-0.236201				R4	EC:2.1.1.193	0.242905	0.965993	-0.135021
BL	EC:2.3.1.118	0.8416	0.996109	0.5				R2	EC:2.1.1.207	0.111526	0.248705	0.339143				R4	EC:2.1.1.195	0.942938	0.998145	-0.166522
BL	EC:2.3.1.12	0.693173	0.996109	-0.139945				R2	EC:2.1.1.217	0.0864251	0.221879	0.354811				R4	EC:2.1.1.196	0.380222	0.998145	-0.995989
BL	EC:2.3.1.128	0.390078	0.996109	-0.0855147				R2	EC:2.1.1.219	0.0456936	0.1766	-0.979899				R4	EC:2.1.1.197	0.980798	0.998145	-0.218434
BL	EC:2.3.1.129	0.833661	0.996109	-0.130122				R2	EC:2.1.1.220	0.0456936	0.1766	-0.979899				R4	EC:2.1.1.198	0.475755	0.998145	-0.115899
BL	EC:2.3.1.15	0.821821	0.996109	-0.172175				R2	EC:2.1.1.222	0.274232	0.436937	-0.931034				R4	EC:2.1.1.199	0.858344	0.998145	-0.156445
BL	EC:2.3.1.157	0.1687	0.996109	-0.0273636				R2	EC:2.1.1.223	0.79863	0.872496	0.115726				R4	EC:2.1.1.200	0.642708	0.998145	-0.999121
BL	EC:2.3.1.16	0.48401	0.996109	1				R2	EC:2.1.1.226	0.0924159	0.224957	0.326514				R4	EC:2.1.1.201	0.738783	0.998145	-0.0968166
BL	EC:2.3.1.168	0.878172	0.996109	-1				R2	EC:2.1.1.227	0.0924159	0.224957	0.326514				R4	EC:2.1.1.207	0.916618	0.998145	-0.16196
BL	EC:2.3.1.169	0.824329	0.996109	1.83333				R2	EC:2.1.1.228	0.604275	0.720845	0.13312				R4	EC:2.1.1.217	0.629701	0.998145	-0.125026
BL	EC:2.3.1.174	0.878172	0.996109	-1				R2	EC:2.1.1.242	0.615012	NA	-1				R4	EC:2.1.1.219	0.0603293	0.903833	-0.980507
BL	EC:2.3.1.178	0.662859	0.996109	Inf				R2	EC:2.1.1.245	0.325277	0.491568	-0.628099				R4	EC:2.1.1.220	0.0603293	0.903833	-0.980507
BL	EC:2.3.1.179	0.183238	0.996109	-0.140742				R2	EC:2.1.1.246	0.147612	0.297828	2				R4	EC:2.1.1.222	0.591895	0.998145	-0.995879
BL	EC:2.3.1.18	0.733383	0.996109	-0.182113				R2	EC:2.1.1.258	0.388814	0.559501	-0.625				R4	EC:2.1.1.223	0.304326	0.998145	-0.129779
BL	EC:2.3.1.180	0.28467	0.996109	-0.122709				R2	EC:2.1.1.264	0.116392	0.255081	-0.576923				R4	EC:2.1.1.224	0.765069	0.998145	-1
BL	EC:2.3.1.181	0.549333	0.996109	-0.270287				R2	EC:2.1.1.265	0.560311	NA	-1				R4	EC:2.1.1.226	0.595087	0.998145	-0.114198
BL	EC:2.3.1.182	0.642707	0.996109	-0.113962				R2	EC:2.1.1.266	0.970135	NA	-0.730769				R4	EC:2.1.1.227	0.595087	0.998145	-0.114198
BL	EC:2.3.1.183	0.180136	0.996109	-0.081912				R2	EC:2.1.1.271	0.0247146	0.133365	0.559787				R4	EC:2.1.1.228	0.144767	0.903833	-0.123269
BL	EC:2.3.1.184	0.750396	0.996109	Inf				R2	EC:2.1.1.289	0.28238	0.441315	-0.993127				R4	EC:2.1.1.242	0.642708	0.998145	-0.999084
BL	EC:2.3.1.187	0.323198	0.996109	-0.733333				R2	EC:2.1.1.297	0.33863	0.507058	0.140378				R4	EC:2.1.1.245	0.0649121	0.903833	-0.715586
BL	EC:2.3.1.189	0.750396	0.996109	Inf				R2	EC:2.1.1.298	0.615012	NA	-1				R4	EC:2.1.1.246	0.530843	0.998145	0.277139
BL	EC:2.3.1.19	0.874598	0.996109	-0.187315				R2	EC:2.1.1.33	0.372745	0.54183	0.140144				R4	EC:2.1.1.258	0.073213	0.903833	-0.720333
BL	EC:2.3.1.191	0.917586	0.996109	-0.173164				R2	EC:2.1.1.34	0.52483	0.653615	0.210783				R4	EC:2.1.1.264	0.303558	0.998145	-0.979084
BL	EC:2.3.1.193	0.69076	0.996109	1.33333				R2	EC:2.1.1.35	0.752803	NA	-0.826087				R4	EC:2.1.1.265	0.751444	0.998145	-0.998975
BL	EC:2.3.1.201	0.691101	0.996109	-0.24066				R2	EC:2.1.1.37	0.0111906	0.090815	0.404858				R4	EC:2.1.1.266	0.464516	0.998145	-0.999201
BL	EC:2.3.1.204	0.607749	0.996109	-0.636364				R2	EC:2.1.1.44	0.518992	NA	-1				R4	EC:2.1.1.271	0.404722	0.998145	-0.0926939
BL	EC:2.3.1.207	0.8416	0.996109	0.5				R2	EC:2.1.1.45	0.0990339	0.232422	0.0655721				R4	EC:2.1.1.289	0.305623	0.998145	-0.996003
BL	EC:2.3.1.210	0.579702	0.996109	Inf				R2	EC:2.1.1.61	0.786607	NA	-0.92				R4	EC:2.1.1.297	0.122045	0.903833	-0.122089
BL	EC:2.3.1.222	0.750396	0.996109	Inf				R2	EC:2.1.1.63	0.108883	0.24472	0.0678602				R4	EC:2.1.1.298	0.642708	0.998145	-0.999139
BL	EC:2.3.1.234	0.0591062	0.996109	-0.111388				R2	EC:2.1.1.64	0.274232	0.436937	-0.931034				R4	EC:2.1.1.33	0.157426	0.903833	-0.128668
BL	EC:2.3.1.241	0.933685	0.996109	-0.170996				R2	EC:2.1.1.67	1	NA	-1				R4	EC:2.1.1.34	0.807789	0.998145	-0.153537
BL	EC:2.3.1.242	0.579702	0.996109	Inf				R2	EC:2.1.1.72	0.0542073	0.181857	0.246035				R4	EC:2.1.1.35	0.993442	0.998145	-0.996814
BL	EC:2.3.1.243	0.872121	0.996109	0.333333				R2	EC:2.1.1.74	0.660781	0.768225	0.281461				R4	EC:2.1.1.37	0.0637518	0.903833	-0.0708073
BL	EC:2.3.1.28	0.0911118	0.996109	-0.0218998				R2	EC:2.1.1.77	0.751588	0.834773	0.186518				R4	EC:2.1.1.44	1	NA	-1
BL	EC:2.3.1.29	0.768339	0.996109	-0.213198				R2	EC:2.1.1.79	0.0046439	0.0749877	-0.580673				R4	EC:2.1.1.45	0.603351	0.998145	-0.167644
BL	EC:2.3.1.30	0.162086	0.996109	-0.141076				R2	EC:2.1.1.80	0.00233917	0.0581741	0.591038				R4	EC:2.1.1.61	0.604071	0.998145	-0.99909
BL	EC:2.3.1.31	0.96608	0.996944	-0.183385				R2	EC:2.1.2.1	0.0295612	0.143297	0.211141				R4	EC:2.1.1.63	0.845098	0.998145	-0.146347
BL	EC:2.3.1.35	0.843398	0.996109	-0.170841				R2	EC:2.1.2.10	0.126642	0.269182	-0.130263				R4	EC:2.1.1.64	0.591895	0.998145	-0.995879
BL	EC:2.3.1.39	0.171839	0.996109	-0.141106				R2	EC:2.1.2.11	0.290044	0.446581	-0.0234544				R4	EC:2.1.1.67	0.92752	0.998145	-0.990079
BL	EC:2.3.1.40	0.579702	0.996109	Inf				R2	EC:2.1.2.13	0.00512358	0.0749877	1.60157				R4	EC:2.1.1.72	0.179291	0.903833	-0.0949416
BL	EC:2.3.1.41	0.911098	0.996109	-0.166667				R2	EC:2.1.2.2	0.101637	0.23395	0.0515443				R4	EC:2.1.1.74	0.745538	0.998145	-0.102235
BL	EC:2.3.1.46	0.317136	0.996109	-0.107034				R2	EC:2.1.2.3	0.0148619	0.0994933	0.16264				R4	EC:2.1.1.77	0.399434	0.998145	-0.308501
BL	EC:2.3.1.47	0.813563	0.996109	-0.12671				R2	EC:2.1.2.5	0.460777	0.620089	0.226538				R4	EC:2.1.1.79	0.0533386	0.903833	-0.553238
BL	EC:2.3.1.48	0.613211	0.996109	0.0555556				R2	EC:2.1.2.9	0.476769	0.620089	0.137684				R4	EC:2.1.1.80	0.246457	0.968269	-0.0452075
BL	EC:2.3.1.51	0.511737	0.996109	-0.174468				R2	EC:2.1.3.1	1	NA	-1				R4	EC:2.1.2.1	0.0237848	0.903833	-0.113584
BL	EC:2.3.1.54	0.710962	0.996109	-0.187032				R2	EC:2.1.3.11	0.0538476	0.181857	-0.472777				R4	EC:2.1.2.10	0.767034	0.998145	-0.169328
BL	EC:2.3.1.57	0.691986	0.996109	-0.189183				R2	EC:2.1.3.2	0.359754	0.528316	0.141473				R4	EC:2.1.2.11	0.684329	0.998145	-0.107886
BL	EC:2.3.1.61	0.511541	0.996109	-0.037542				R2	EC:2.1.3.3	0.0175939	0.107742	0.283947				R4	EC:2.1.2.13	0.842599	0.998145	-0.181753
BL	EC:2.3.1.79	0.845666	0.996109	-0.159555				R2	EC:2.1.3.6	0.204091	0.358099	-0.331034				R4	EC:2.1.2.2	0.606983	0.998145	-0.143963
BL	EC:2.3.1.8	0.555813	0.996109	-0.145065				R2	EC:2.1.4.1	0.280332	0.439315	-0.427083				R4	EC:2.1.2.3	0.376814	0.998145	-0.140049
BL	EC:2.3.1.81	0.240513	0.996109	0.322034				R2	EC:2.10.1.1	0.248438	0.40894	-0.12024				R4	EC:2.1.2.5	0.954077	0.998145	-0.115472
BL	EC:2.3.1.82	0.499446	0.996109	-0.307367				R2	EC:2.2.1.1	0.459975	0.620089	0.182406				R4	EC:2.1.2.9	0.151948	0.903833	-0.112887
BL	EC:2.3.1.89	0.432871	0.996109	-0.0317934				R2	EC:2.2.1.2	0.819492	0.882055	0.087001				R4	EC:2.1.3.11	0.751824	0.998145	-0.102068
BL	EC:2.3.1.9	0.92397	0.996109	-0.171363				R2	EC:2.2.1.6	0.00323638	0.0665129	0.273873				R4	EC:2.1.3.2	0.110917	0.903833	-0.123219
BL	EC:2.3.2.10	0.869345	0.996109	0.35				R2	EC:2.2.1.7	0.69937	0.800079	0.135138				R4	EC:2.1.3.3	0.682579	0.998145	-0.158411
BL	EC:2.3.2.13	0.666895	0.996109	-0.29932				R2	EC:2.2.1.9	0.0521067	0.181857	-0.473				R4	EC:2.1.3.6	0.526728	0.998145	0.0411199
BL	EC:2.3.2.17	0.89109	0.996109	0.346154				R2	EC:2.3.1.1	0.0210325	0.121521	0.439721				R4	EC:2.1.3.9	1	NA	-1
BL	EC:2.3.2.18	0.89109	0.996109	0.346154				R2	EC:2.3.1.109	0.566325	NA	-0.944444				R4	EC:2.1.4.1	0.261481	0.985868	-0.40343
BL	EC:2.3.2.2	0.318275	0.996109	0.0385588				R2	EC:2.3.1.117	0.886988	0.922468	0.130404				R4	EC:2.10.1.1	0.0938237	0.903833	-0.36187
BL	EC:2.3.2.27	0.662859	0.996109	Inf				R2	EC:2.3.1.118	0.0257928	0.134199	-0.894737				R4	EC:2.2.1.1	0.210729	0.950833	-0.205554
BL	EC:2.3.2.3	0.370555	0.996109	0.92				R2	EC:2.3.1.12	0.117002	0.255727	0.655005				R4	EC:2.2.1.2	0.131269	0.903833	-0.241647
BL	EC:2.3.2.6	0.553489	0.996109	-0.339297				R2	EC:2.3.1.122	1	NA	-1				R4	EC:2.2.1.6	0.183175	0.904779	-0.110962
BL	EC:2.3.2.8	0.8416	0.996109	0.5				R2	EC:2.3.1.128	0.171926	0.33056	0.293134				R4	EC:2.2.1.7	0.352395	0.998145	-0.137804
BL	EC:2.3.3.1	0.468225	0.996109	-0.197171				R2	EC:2.3.1.129	0.0817614	0.221879	-0.208342				R4	EC:2.2.1.9	0.969025	0.998145	-0.21243
BL	EC:2.3.3.10	0.352025	0.996109	-0.378109				R2	EC:2.3.1.15	0.0173217	0.107742	0.296613				R4	EC:2.3.1.1	0.584724	0.998145	-0.13133
BL	EC:2.3.3.13	0.708971	0.996109	-0.170199				R2	EC:2.3.1.157	0.850438	0.900834	0.2106				R4	EC:2.3.1.102	1	NA	-1
BL	EC:2.3.3.14	0.395374	0.996109	-0.705				R2	EC:2.3.1.16	0.985869	0.989329	-0.769231				R4	EC:2.3.1.109	0.739552	0.998145	-0.994976
BL	EC:2.3.3.5	0.692297	0.996109	1.5				R2	EC:2.3.1.168	0.936597	NA	-0.885714				R4	EC:2.3.1.117	0.457621	0.998145	-0.213045
BL	EC:2.3.3.9	0.387646	0.996109	5				R2	EC:2.3.1.169	0.286453	0.444097	-0.97				R4	EC:2.3.1.118	0.483287	0.998145	-0.993809
BL	EC:2.4.1.1	0.461108	0.996109	-0.175112				R2	EC:2.3.1.174	1	NA	-1				R4	EC:2.3.1.12	0.590408	0.998145	-0.243087
BL	EC:2.4.1.10	0.418182	0.996109	-0.377834				R2	EC:2.3.1.178	0.845278	NA	-0.777778				R4	EC:2.3.1.128	0.695662	0.998145	-0.18195
BL	EC:2.4.1.11	0.908415	0.996109	-0.19527				R2	EC:2.3.1.179	0.0153067	0.0994933	0.168172				R4	EC:2.3.1.129	0.838568	0.998145	-0.123777
BL	EC:2.4.1.12	0.547261	0.996109	3				R2	EC:2.3.1.18	0.0221852	0.125915	0.489192				R4	EC:2.3.1.15	0.754279	0.998145	-0.131682
BL	EC:2.4.1.129	0.437442	0.996109	-0.0620597				R2	EC:2.3.1.180	0.135897	0.28248	0.0578796				R4	EC:2.3.1.157	0.579642	0.998145	-0.207151
BL	EC:2.4.1.144	0.913226	0.996109	-0.175437				R2	EC:2.3.1.181	0.468459	0.620089	0.218212				R4	EC:2.3.1.16	0.592518	0.998145	-0.996439
BL	EC:2.4.1.15	0.608243	0.996109	-0.0226707				R2	EC:2.3.1.182	0.190212	0.347054	-0.130167				R4	EC:2.3.1.168	0.591895	0.998145	-0.872286
BL	EC:2.4.1.166	0.841272	0.996109	Inf				R2	EC:2.3.1.183	0.814051	0.88056	0.156045				R4	EC:2.3.1.169	0.315169	0.998145	-0.896158
BL	EC:2.4.1.18	0.448886	0.996109	-0.143382				R2	EC:2.3.1.184	0.938388	NA	Inf				R4	EC:2.3.1.174	0.92752	0.998145	-0.994513
BL	EC:2.4.1.180	0.579702	0.996109	Inf				R2	EC:2.3.1.187	0.845126	0.898591	-0.4				R4	EC:2.3.1.178	1	NA	-1
BL	EC:2.4.1.182	0.923561	0.996109	-0.1725				R2	EC:2.3.1.189	1	NA	-1				R4	EC:2.3.1.179	0.245577	0.967366	-0.133418
BL	EC:2.4.1.187	0.531536	0.996109	-0.0826825				R2	EC:2.3.1.19	0.00783728	0.0809589	0.439461				R4	EC:2.3.1.18	0.929477	0.998145	-0.171543
BL	EC:2.4.1.20	0.921591	0.996109	-0.149157				R2	EC:2.3.1.191	0.207781	0.361798	-0.0894605				R4	EC:2.3.1.180	0.534307	0.998145	-0.139815
BL	EC:2.4.1.208	0.589009	0.996109	-0.0796277				R2	EC:2.3.1.193	0.560311	NA	-1				R4	EC:2.3.1.181	0.793468	0.998145	-0.150932
BL	EC:2.4.1.21	0.129779	0.996109	-0.137785				R2	EC:2.3.1.20	1	NA	-1				R4	EC:2.3.1.182	0.782873	0.998145	-0.0897605
BL	EC:2.4.1.211	0.362088	0.996109	-0.253711				R2	EC:2.3.1.200	0.845278	NA	Inf				R4	EC:2.3.1.183	0.534793	0.998145	-0.140827
BL	EC:2.4.1.216	0.841272	0.996109	Inf				R2	EC:2.3.1.201	0.875825	0.916692	0.15508				R4	EC:2.3.1.184	1	NA	-1
BL	EC:2.4.1.227	0.189854	0.996109	-0.141427				R2	EC:2.3.1.203	0.78235	NA	-1				R4	EC:2.3.1.187	0.478377	0.998145	-0.871257
BL	EC:2.4.1.230	0.557793	0.996109	1.47059				R2	EC:2.3.1.204	0.85741	0.90738	-0.32				R4	EC:2.3.1.189	1	NA	-1
BL	EC:2.4.1.25	0.765513	0.996109	-0.14537				R2	EC:2.3.1.207	1	NA	-1				R4	EC:2.3.1.19	0.31397	0.998145	-0.0465767
BL	EC:2.4.1.250	0.750396	0.996109	Inf				R2	EC:2.3.1.210	0.615012	NA	-1				R4	EC:2.3.1.191	0.945633	0.998145	-0.130288
BL	EC:2.4.1.266	0.502019	0.996109	Inf				R2	EC:2.3.1.222	0.615012	NA	-1				R4	EC:2.3.1.193	0.765069	0.998145	-1
BL	EC:2.4.1.280	0.455725	0.996109	0.00344234				R2	EC:2.3.1.228	0.797178	NA	-0.5				R4	EC:2.3.1.20	1	NA	-1
BL	EC:2.4.1.281	0.373109	0.996109	-0.370008				R2	EC:2.3.1.229	0.797178	NA	-0.5				R4	EC:2.3.1.201	0.505518	0.998145	-0.0562898
BL	EC:2.4.1.315	0.927878	0.996109	-0.167049				R2	EC:2.3.1.234	0.0387887	0.164651	0.186699				R4	EC:2.3.1.202	0.911304	0.998145	-1
BL	EC:2.4.1.319	0.689042	0.996109	-0.0526043				R2	EC:2.3.1.241	0.174918	0.334067	-0.102307				R4	EC:2.3.1.203	1	NA	-1
BL	EC:2.4.1.320	0.689042	0.996109	-0.0526043				R2	EC:2.3.1.242	0.615012	NA	-1				R4	EC:2.3.1.204	0.894848	0.998145	-0.157088
BL	EC:2.4.1.325	0.579702	0.996109	Inf				R2	EC:2.3.1.243	0.560311	NA	-1				R4	EC:2.3.1.207	0.92752	0.998145	-0.990338
BL	EC:2.4.1.4	0.922757	0.996109	-0.178229				R2	EC:2.3.1.28	0.0977123	0.231434	-0.0581034				R4	EC:2.3.1.210	1	NA	-1
BL	EC:2.4.1.44	0.750396	0.996109	Inf				R2	EC:2.3.1.29	0.376516	0.544544	0.237816				R4	EC:2.3.1.222	1	NA	-1
BL	EC:2.4.1.5	0.841272	0.996109	Inf				R2	EC:2.3.1.30	0.0478533	0.17832	0.169038				R4	EC:2.3.1.223	1	NA	-1
BL	EC:2.4.1.52	0.878172	0.996109	-1				R2	EC:2.3.1.31	0.475343	0.620089	0.222136				R4	EC:2.3.1.228	0.622813	0.998145	Inf
BL	EC:2.4.1.57	0.988215	0.997622	0.404255				R2	EC:2.3.1.35	0.0208336	0.120983	0.440597				R4	EC:2.3.1.229	0.622813	0.998145	Inf
BL	EC:2.4.1.58	0.750396	0.996109	Inf				R2	EC:2.3.1.37	0.696102	NA	-0.666667				R4	EC:2.3.1.234	0.0803492	0.903833	-0.118726
BL	EC:2.4.1.64	0.85382	0.996109	-0.107542				R2	EC:2.3.1.39	0.0135744	0.0994933	0.168825				R4	EC:2.3.1.241	0.967704	0.998145	-0.146742
BL	EC:2.4.1.7	0.867298	0.996109	-0.262326				R2	EC:2.3.1.40	0.545207	NA	-0.666667				R4	EC:2.3.1.242	1	NA	-1
BL	EC:2.4.1.8	0.857397	0.996109	-0.330855				R2	EC:2.3.1.41	0.682969	NA	-0.973684				R4	EC:2.3.1.243	0.765069	0.998145	-1
BL	EC:2.4.1.83	0.968074	0.996944	-0.158098				R2	EC:2.3.1.46	0.555352	0.678039	0.176794				R4	EC:2.3.1.28	0.732231	0.998145	-0.138529
BL	EC:2.4.2.1	0.84981	0.996109	-0.162009				R2	EC:2.3.1.47	0.0819164	0.221879	-0.216855				R4	EC:2.3.1.29	0.74629	0.998145	-0.161729
BL	EC:2.4.2.10	0.918732	0.996109	-0.156639				R2	EC:2.3.1.48	0.276125	0.436969	-0.410714				R4	EC:2.3.1.30	0.173746	0.903833	-0.130811
BL	EC:2.4.2.14	0.93404	0.996109	-0.156855				R2	EC:2.3.1.51	0.0796578	0.221879	0.18632				R4	EC:2.3.1.31	0.967431	0.998145	-0.107042
BL	EC:2.4.2.17	0.965094	0.996944	-0.157727				R2	EC:2.3.1.54	0.151867	0.302676	0.252327				R4	EC:2.3.1.35	0.381385	0.998145	-0.0990534
BL	EC:2.4.2.18	0.724298	0.996109	-0.173482				R2	EC:2.3.1.57	0.135431	0.282474	-0.101727				R4	EC:2.3.1.37	0.578957	0.998145	0.777778
BL	EC:2.4.2.19	0.913558	0.996109	-0.167876				R2	EC:2.3.1.61	0.194756	0.35142	0.760149				R4	EC:2.3.1.39	0.223738	0.953217	-0.131673
BL	EC:2.4.2.2	0.758159	0.996109	-0.105108				R2	EC:2.3.1.79	0.181639	0.343464	0.175306				R4	EC:2.3.1.40	0.896154	0.998145	-0.999495
BL	EC:2.4.2.21	0.771384	0.996109	-0.137055				R2	EC:2.3.1.8	0.0872152	0.221879	0.19559				R4	EC:2.3.1.41	0.656801	0.998145	-0.998289
BL	EC:2.4.2.22	0.633121	0.996109	-0.111954				R2	EC:2.3.1.81	0.132591	0.27883	-0.215994				R4	EC:2.3.1.46	0.369964	0.998145	-0.135002
BL	EC:2.4.2.28	0.300464	0.996109	-0.427278				R2	EC:2.3.1.82	0.489278	0.626802	-0.272134				R4	EC:2.3.1.47	0.895261	0.998145	-0.139118
BL	EC:2.4.2.29	0.124946	0.996109	-0.13948				R2	EC:2.3.1.89	0.147234	0.297589	0.767167				R4	EC:2.3.1.48	0.511532	0.998145	-0.294294
BL	EC:2.4.2.3	0.227753	0.996109	-0.125566				R2	EC:2.3.1.9	0.285552	0.443847	0.197237				R4	EC:2.3.1.51	0.655452	0.998145	-0.146333
BL	EC:2.4.2.4	0.337954	0.996109	Inf				R2	EC:2.3.2.10	0.134671	0.282474	0.554217				R4	EC:2.3.1.54	0.537625	0.998145	-0.227413
BL	EC:2.4.2.43	0.994727	0.997622	0				R2	EC:2.3.2.13	0.924571	0.950322	-0.166667				R4	EC:2.3.1.57	0.87258	0.998145	-0.157824
BL	EC:2.4.2.52	0.330384	0.996109	-0.356415				R2	EC:2.3.2.16	0.518992	NA	-1				R4	EC:2.3.1.61	0.865078	0.998145	-0.566356
BL	EC:2.4.2.53	0.925453	0.996109	-0.17222				R2	EC:2.3.2.17	0.150554	0.301108	0.52071				R4	EC:2.3.1.79	0.355068	0.998145	-0.128696
BL	EC:2.4.2.6	0.417348	0.996109	-0.376574				R2	EC:2.3.2.18	0.150554	0.301108	0.52071				R4	EC:2.3.1.8	0.212549	0.951166	-0.126896
BL	EC:2.4.2.7	0.268022	0.996109	-0.119821				R2	EC:2.3.2.2	0.00650271	0.0779922	0.637327				R4	EC:2.3.1.81	0.15451	0.903833	-0.383434
BL	EC:2.4.2.8	0.378701	0.996109	-0.143995				R2	EC:2.3.2.3	0.570326	0.690426	-0.425926				R4	EC:2.3.1.82	0.655339	0.998145	0.0459465
BL	EC:2.4.2.9	0.0955633	0.996109	-0.108418				R2	EC:2.3.2.5	0.96765	NA	0				R4	EC:2.3.1.89	0.923474	0.998145	-0.132032
BL	EC:2.4.99.12	0.889749	0.996109	-0.177423				R2	EC:2.3.2.6	0.758563	0.840887	0.0899051				R4	EC:2.3.1.9	0.353272	0.998145	-0.226921
BL	EC:2.4.99.13	0.889749	0.996109	-0.177423				R2	EC:2.3.2.8	0.895191	NA	-0.84				R4	EC:2.3.2.10	0.143214	0.903833	0.233734
BL	EC:2.4.99.14	0.889749	0.996109	-0.177423				R2	EC:2.3.3.1	0.0144818	0.0994933	0.322929				R4	EC:2.3.2.13	0.181288	0.903833	0.217565
BL	EC:2.4.99.15	0.889749	0.996109	-0.177423				R2	EC:2.3.3.10	0.0090348	0.0820302	-0.927556				R4	EC:2.3.2.17	0.157993	0.903833	0.243024
BL	EC:2.4.99.16	0.921444	0.996109	0.375				R2	EC:2.3.3.13	0.0252147	0.134199	0.18793				R4	EC:2.3.2.18	0.157993	0.903833	0.243024
BL	EC:2.4.99.17	0.413643	0.996109	-0.13374				R2	EC:2.3.3.14	0.499722	0.636617	-0.819113				R4	EC:2.3.2.2	0.0566397	0.903833	-0.629143
BL	EC:2.5.1.1	0.188591	0.996109	-0.141386				R2	EC:2.3.3.5	0.615012	NA	-1				R4	EC:2.3.2.3	0.428251	0.998145	-0.758002
BL	EC:2.5.1.10	0.188591	0.996109	-0.141386				R2	EC:2.3.3.9	0.504959	NA	-0.938462				R4	EC:2.3.2.5	0.896154	0.998145	-0.94152
BL	EC:2.5.1.101	0.990681	0.997622	-0.228982				R2	EC:2.4.1.1	0.0370397	0.161116	0.208747				R4	EC:2.3.2.6	0.992586	0.998145	-0.248803
BL	EC:2.5.1.105	0.59232	0.996109	-0.122374				R2	EC:2.4.1.10	0.0373995	0.162064	-0.935943				R4	EC:2.3.2.8	0.498911	0.998145	-0.969136
BL	EC:2.5.1.120	0.908415	0.996109	-0.19527				R2	EC:2.4.1.11	0.524856	0.653615	0.210378				R4	EC:2.3.3.1	0.911625	0.998145	-0.144801
BL	EC:2.5.1.15	0.949149	0.996109	-0.163946				R2	EC:2.4.1.12	0.342957	NA	-0.954545				R4	EC:2.3.3.10	0.433915	0.998145	0.553589
BL	EC:2.5.1.16	0.474842	0.996109	-0.0686164				R2	EC:2.4.1.129	0.0455621	0.1766	0.65945				R4	EC:2.3.3.13	0.0787009	0.903833	-0.119493
BL	EC:2.5.1.17	0.647944	0.996109	-0.1655				R2	EC:2.4.1.144	0.00702345	0.0779922	0.891779				R4	EC:2.3.3.14	0.197012	0.941367	-0.917535
BL	EC:2.5.1.18	0.755336	0.996109	0.684211				R2	EC:2.4.1.15	0.0531802	0.181857	-0.47435				R4	EC:2.3.3.5	0.92752	0.998145	-0.999105
BL	EC:2.5.1.19	0.125373	0.996109	-0.139477				R2	EC:2.4.1.166	0.288223	NA	-0.666667				R4	EC:2.3.3.9	0.591895	0.998145	-0.997689
BL	EC:2.5.1.21	0.786285	0.996109	-1				R2	EC:2.4.1.18	0.0112329	0.090815	0.217388				R4	EC:2.4.1.1	0.51117	0.998145	-0.139263
BL	EC:2.5.1.26	0.662859	0.996109	Inf				R2	EC:2.4.1.180	0.615012	NA	-1				R4	EC:2.4.1.10	0.539537	0.998145	0.539865
BL	EC:2.5.1.29	0.189844	0.996109	-0.141392				R2	EC:2.4.1.182	0.210509	0.363232	-0.0902217				R4	EC:2.4.1.11	0.962228	0.998145	-0.0832563
BL	EC:2.5.1.3	0.571648	0.996109	-0.128733				R2	EC:2.4.1.187	0.0426	0.1716	0.579997				R4	EC:2.4.1.12	0.92752	0.998145	-0.999498
BL	EC:2.5.1.30	0.615007	0.996109	-0.113273				R2	EC:2.4.1.20	0.00617177	0.0779922	0.762834				R4	EC:2.4.1.129	0.597803	0.998145	-0.131078
BL	EC:2.5.1.31	0.975897	0.996944	-0.156547				R2	EC:2.4.1.208	0.334418	0.502533	0.481481				R4	EC:2.4.1.14	0.765069	0.998145	-1
BL	EC:2.5.1.32	0.750396	0.996109	Inf				R2	EC:2.4.1.21	0.058184	0.190724	0.167866				R4	EC:2.4.1.144	0.117161	0.903833	0.125752
BL	EC:2.5.1.39	0.608169	0.996109	-0.25527				R2	EC:2.4.1.211	0.0909034	0.224957	0.360394				R4	EC:2.4.1.15	0.875291	0.998145	-0.168548
BL	EC:2.5.1.44	0.878172	0.996109	-1				R2	EC:2.4.1.212	0.78235	NA	-1				R4	EC:2.4.1.166	0.747141	0.998145	-0.444444
BL	EC:2.5.1.46	0.750396	0.996109	Inf				R2	EC:2.4.1.216	0.288223	NA	-0.666667				R4	EC:2.4.1.18	0.264178	0.985868	-0.127111
BL	EC:2.5.1.47	0.216605	0.996109	-0.12341				R2	EC:2.4.1.227	0.477276	0.620089	0.137526				R4	EC:2.4.1.180	1	NA	-1
BL	EC:2.5.1.48	0.577035	0.996109	0.104167				R2	EC:2.4.1.230	1	NA	-1				R4	EC:2.4.1.182	0.944401	0.998145	-0.129743
BL	EC:2.5.1.49	0.67997	0.996109	-0.145846				R2	EC:2.4.1.25	0.653891	0.763848	0.158045				R4	EC:2.4.1.187	0.225679	0.953217	-0.070247
BL	EC:2.5.1.54	0.80912	0.996109	-0.16315				R2	EC:2.4.1.250	1	NA	-1				R4	EC:2.4.1.20	0.0558542	0.903833	0.0829777
BL	EC:2.5.1.55	0.923561	0.996109	-0.1725				R2	EC:2.4.1.266	1	NA	-1				R4	EC:2.4.1.208	0.816151	0.998145	-0.089998
BL	EC:2.5.1.56	0.4972	0.996109	-0.318461				R2	EC:2.4.1.280	0.00162841	0.0474135	1.73863				R4	EC:2.4.1.21	0.445019	0.998145	-0.141541
BL	EC:2.5.1.6	0.150684	0.996109	-0.13405				R2	EC:2.4.1.281	0.258556	0.421631	-0.37246				R4	EC:2.4.1.211	0.952592	0.998145	-0.166386
BL	EC:2.5.1.61	0.207203	0.996109	-0.262382				R2	EC:2.4.1.287	1	NA	-1				R4	EC:2.4.1.212	1	NA	-1
BL	EC:2.5.1.68	0.750396	0.996109	Inf				R2	EC:2.4.1.288	1	NA	-1				R4	EC:2.4.1.216	0.747141	0.998145	-0.444444
BL	EC:2.5.1.7	0.204866	0.996109	-0.119993				R2	EC:2.4.1.289	1	NA	-1				R4	EC:2.4.1.227	0.148356	0.903833	-0.125108
BL	EC:2.5.1.72	0.758459	0.996109	-0.183733				R2	EC:2.4.1.315	0.000329234	0.0209246	-0.666291				R4	EC:2.4.1.230	0.348543	0.998145	-1
BL	EC:2.5.1.74	0.677897	0.996109	-0.118239				R2	EC:2.4.1.319	0.028996	0.141859	-0.455643				R4	EC:2.4.1.245	1	NA	-1
BL	EC:2.5.1.75	0.338302	0.996109	-0.124859				R2	EC:2.4.1.320	0.028996	0.141859	-0.455643				R4	EC:2.4.1.25	0.76551	0.998145	-0.155812
BL	EC:2.5.1.76	0.908415	0.996109	-0.19527				R2	EC:2.4.1.325	0.615012	NA	-1				R4	EC:2.4.1.250	1	NA	-1
BL	EC:2.5.1.78	0.874792	0.996109	-0.180409				R2	EC:2.4.1.4	0.006018	0.0779922	0.854743				R4	EC:2.4.1.266	1	NA	-1
BL	EC:2.5.1.9	0.878227	0.996109	-0.180089				R2	EC:2.4.1.5	0.288223	NA	-0.666667				R4	EC:2.4.1.280	0.178215	0.903833	0.0965383
BL	EC:2.5.1.90	0.921763	0.996109	-0.172762				R2	EC:2.4.1.52	0.786478	NA	-0.6				R4	EC:2.4.1.281	0.29071	0.998145	-0.532111
BL	EC:2.5.1.97	0.913226	0.996109	-0.175437				R2	EC:2.4.1.57	0.0465224	0.177999	-0.979764				R4	EC:2.4.1.287	1	NA	-1
BL	EC:2.6.1.1	0.00800961	0.996109	-0.0850068				R2	EC:2.4.1.64	0.00510617	0.0749877	1.60102				R4	EC:2.4.1.288	1	NA	-1
BL	EC:2.6.1.102	0.586248	0.996109	-0.329127				R2	EC:2.4.1.7	0.174366	0.333998	-0.0985401				R4	EC:2.4.1.289	1	NA	-1
BL	EC:2.6.1.11	0.56572	0.996109	-0.150372				R2	EC:2.4.1.8	0.00405431	0.0714205	-0.928004				R4	EC:2.4.1.315	0.00390014	0.725914	-0.674126
BL	EC:2.6.1.13	0.662859	0.996109	Inf				R2	EC:2.4.1.83	0.340438	0.508546	0.0335057				R4	EC:2.4.1.319	0.719086	0.998145	-0.100491
BL	EC:2.6.1.16	0.304672	0.996109	-0.144634				R2	EC:2.4.2.1	0.0484209	0.17946	0.0627197				R4	EC:2.4.1.320	0.719086	0.998145	-0.100491
BL	EC:2.6.1.17	0.830562	0.996109	-0.171532				R2	EC:2.4.2.10	0.112125	0.249554	0.201589				R4	EC:2.4.1.325	1	NA	-1
BL	EC:2.6.1.18	0.692297	0.996109	1.5				R2	EC:2.4.2.14	0.733352	0.823312	0.133913				R4	EC:2.4.1.4	0.0978267	0.903833	0.122166
BL	EC:2.6.1.19	0.475426	0.996109	-0.0493197				R2	EC:2.4.2.17	0.0691606	0.20681	0.169129				R4	EC:2.4.1.44	0.765069	0.998145	-1
BL	EC:2.6.1.2	0.249735	0.996109	0.68435				R2	EC:2.4.2.18	0.517654	0.653615	0.0870397				R4	EC:2.4.1.5	0.747141	0.998145	-0.444444
BL	EC:2.6.1.21	0.383247	0.996109	-0.351413				R2	EC:2.4.2.19	0.261876	0.426154	0.0530047				R4	EC:2.4.1.52	0.565858	0.998145	-0.869281
BL	EC:2.6.1.22	0.425519	0.996109	-0.94				R2	EC:2.4.2.2	0.357723	0.526324	0.0910362				R4	EC:2.4.1.57	0.109637	0.903833	-0.985014
BL	EC:2.6.1.37	0.873037	0.996109	-0.12739				R2	EC:2.4.2.21	0.0632102	0.199208	0.371979				R4	EC:2.4.1.58	0.765069	0.998145	-1
BL	EC:2.6.1.42	0.263027	0.996109	-0.143119				R2	EC:2.4.2.22	0.113884	0.252486	0.326251				R4	EC:2.4.1.64	0.286513	0.998145	0.0633034
BL	EC:2.6.1.44	0.662859	0.996109	Inf				R2	EC:2.4.2.28	0.0738546	0.214441	-0.408041				R4	EC:2.4.1.7	0.0813097	0.903833	-0.596977
BL	EC:2.6.1.45	0.662859	0.996109	Inf				R2	EC:2.4.2.29	0.0146398	0.0994933	0.162553				R4	EC:2.4.1.8	0.540273	0.998145	0.299536
BL	EC:2.6.1.48	0.878172	0.996109	-1				R2	EC:2.4.2.3	0.129145	0.273597	0.153614				R4	EC:2.4.1.83	0.168476	0.903833	-0.0555298
BL	EC:2.6.1.51	0.662859	0.996109	Inf				R2	EC:2.4.2.4	0.615012	NA	-1				R4	EC:2.4.2.1	0.145563	0.903833	-0.197006
BL	EC:2.6.1.52	0.449731	0.996109	-0.14776				R2	EC:2.4.2.43	0.615012	NA	-1				R4	EC:2.4.2.10	0.535404	0.998145	-0.141426
BL	EC:2.6.1.55	0.520535	0.996109	-0.300341				R2	EC:2.4.2.45	1	NA	-1				R4	EC:2.4.2.12	1	NA	-1
BL	EC:2.6.1.57	0.061355	0.996109	0.56338				R2	EC:2.4.2.46	1	NA	-1				R4	EC:2.4.2.14	0.121835	0.903833	-0.121929
BL	EC:2.6.1.59	0.917416	0.996109	-0.174399				R2	EC:2.4.2.47	1	NA	-1				R4	EC:2.4.2.17	0.020716	0.903833	-0.110971
BL	EC:2.6.1.62	0.801842	0.996109	-0.0940651				R2	EC:2.4.2.52	0.223257	0.37838	-0.24008				R4	EC:2.4.2.18	0.378956	0.998145	-0.131554
BL	EC:2.6.1.66	0.229928	0.996109	0.70557				R2	EC:2.4.2.53	0.00720428	0.0779922	0.884689				R4	EC:2.4.2.19	0.845351	0.998145	-0.143267
BL	EC:2.6.1.76	0.645515	0.996109	2				R2	EC:2.4.2.6	0.0107513	0.0904374	-0.933036				R4	EC:2.4.2.2	0.425658	0.998145	-0.220727
BL	EC:2.6.1.77	0.662859	0.996109	Inf				R2	EC:2.4.2.7	0.847475	0.899362	0.138664				R4	EC:2.4.2.21	0.876241	0.998145	-0.204033
BL	EC:2.6.1.81	0.579702	0.996109	Inf				R2	EC:2.4.2.8	0.52044	0.653615	0.110919				R4	EC:2.4.2.22	0.983538	0.998145	-0.174907
BL	EC:2.6.1.82	0.129438	0.996109	0.356164				R2	EC:2.4.2.9	0.475866	0.620089	0.103581				R4	EC:2.4.2.28	0.20567	0.941367	-0.420785
BL	EC:2.6.1.83	0.77431	0.996109	-0.16407				R2	EC:2.4.99.12	0.199317	0.354458	-0.0979639				R4	EC:2.4.2.29	0.227136	0.953217	-0.131852
BL	EC:2.6.1.84	0.878172	0.996109	-1				R2	EC:2.4.99.13	0.199317	0.354458	-0.0979639				R4	EC:2.4.2.3	0.278952	0.998145	-0.128039
BL	EC:2.6.1.85	0.521304	0.996109	-0.274172				R2	EC:2.4.99.14	0.199317	0.354458	-0.0979639				R4	EC:2.4.2.4	1	NA	-1
BL	EC:2.6.1.87	0.579702	0.996109	Inf				R2	EC:2.4.99.15	0.199317	0.354458	-0.0979639				R4	EC:2.4.2.43	0.862073	0.998145	-0.998014
BL	EC:2.6.1.9	0.517447	0.996109	-0.149436				R2	EC:2.4.99.16	0.0436253	0.172148	-0.98036				R4	EC:2.4.2.44	1	NA	-1
BL	EC:2.6.99.2	0.888396	0.996109	-0.17771				R2	EC:2.4.99.17	0.397132	0.56861	0.0796249				R4	EC:2.4.2.52	0.116493	0.903833	-0.468374
BL	EC:2.7.1.1	0.878172	0.996109	-1				R2	EC:2.5.1.1	0.477507	0.620089	0.137515				R4	EC:2.4.2.53	0.351303	0.998145	-0.0293154
BL	EC:2.7.1.100	0.949137	0.996109	0.0913706				R2	EC:2.5.1.10	0.477507	0.620089	0.137515				R4	EC:2.4.2.6	0.474217	0.998145	0.574847
BL	EC:2.7.1.107	0.653385	0.996109	-0.0690852				R2	EC:2.5.1.101	0.00798724	0.0809589	0.856938				R4	EC:2.4.2.7	0.153569	0.903833	-0.110022
BL	EC:2.7.1.11	0.438719	0.996109	-0.187292				R2	EC:2.5.1.105	0.155111	0.307002	0.380128				R4	EC:2.4.2.8	0.191367	0.928163	-0.121865
BL	EC:2.7.1.113	0.786285	0.996109	13				R2	EC:2.5.1.120	0.523696	0.653615	0.210955				R4	EC:2.4.2.9	0.538746	0.998145	-0.12723
BL	EC:2.7.1.12	0.243488	0.996109	-0.371605				R2	EC:2.5.1.15	0.883883	0.920913	0.149302				R4	EC:2.4.99.12	0.936424	0.998145	-0.127182
BL	EC:2.7.1.13	0.878172	0.996109	-1				R2	EC:2.5.1.16	0.0310058	0.146388	0.546963				R4	EC:2.4.99.13	0.936424	0.998145	-0.127182
BL	EC:2.7.1.130	0.889749	0.996109	-0.177423				R2	EC:2.5.1.17	0.748735	0.833222	0.108883				R4	EC:2.4.99.14	0.936424	0.998145	-0.127182
BL	EC:2.7.1.14	0.613169	0.996109	0.106383				R2	EC:2.5.1.18	0.535874	0.661316	-0.883408				R4	EC:2.4.99.15	0.936424	0.998145	-0.127182
BL	EC:2.7.1.144	0.649103	0.996109	0.88				R2	EC:2.5.1.19	0.014951	0.0994933	0.162374				R4	EC:2.4.99.16	0.102201	0.903833	-0.983812
BL	EC:2.7.1.146	0.790345	0.996109	0.0147059				R2	EC:2.5.1.21	0.875759	NA	-0.5				R4	EC:2.4.99.17	0.518249	0.998145	-0.119127
BL	EC:2.7.1.147	0.790345	0.996109	0.0147059				R2	EC:2.5.1.26	0.272699	0.436492	-0.857143				R4	EC:2.5.1.1	0.148816	0.903833	-0.125194
BL	EC:2.7.1.148	0.124791	0.996109	-0.13946				R2	EC:2.5.1.29	0.472063	0.620089	0.137703				R4	EC:2.5.1.10	0.148816	0.903833	-0.125194
BL	EC:2.7.1.15	0.572032	0.996109	-0.197343				R2	EC:2.5.1.3	0.184033	0.344968	0.0157593				R4	EC:2.5.1.101	0.539512	0.998145	0.0956546
BL	EC:2.7.1.156	0.735893	0.996109	-0.131617				R2	EC:2.5.1.30	0.0763135	0.217712	0.358347				R4	EC:2.5.1.105	0.601232	0.998145	-0.202907
BL	EC:2.7.1.16	0.128568	0.996109	0.492063				R2	EC:2.5.1.31	0.0242324	0.13264	0.0973298				R4	EC:2.5.1.120	0.963728	0.998145	-0.0836796
BL	EC:2.7.1.166	0.786285	0.996109	-1				R2	EC:2.5.1.32	0.809079	NA	-0.75				R4	EC:2.5.1.15	0.629899	0.998145	-0.121966
BL	EC:2.7.1.167	0.828274	0.996109	-0.35				R2	EC:2.5.1.39	0.434176	0.607953	0.227742				R4	EC:2.5.1.16	0.405574	0.998145	-0.0931157
BL	EC:2.7.1.168	0.350926	0.996109	-0.370547				R2	EC:2.5.1.44	1	NA	-1				R4	EC:2.5.1.17	0.482437	0.998145	-0.173142
BL	EC:2.7.1.17	0.491358	0.996109	-0.224565				R2	EC:2.5.1.46	0.821014	NA	1.66667				R4	EC:2.5.1.18	0.592309	0.998145	-0.988977
BL	EC:2.7.1.170	0.643554	0.996109	0.8				R2	EC:2.5.1.47	0.00418977	0.0726227	0.243322				R4	EC:2.5.1.19	0.229015	0.953217	-0.131935
BL	EC:2.7.1.176	0.77573	0.996109	-0.0196078				R2	EC:2.5.1.48	0.00353008	0.0678077	-0.736614				R4	EC:2.5.1.21	0.710721	0.998145	-0.982906
BL	EC:2.7.1.177	0.611911	0.996109	7.4				R2	EC:2.5.1.49	0.00717748	0.0779922	0.27184				R4	EC:2.5.1.26	1	NA	-1
BL	EC:2.7.1.182	0.878172	0.996109	-1				R2	EC:2.5.1.54	0.153953	0.305238	0.317952				R4	EC:2.5.1.29	0.146977	0.903833	-0.107893
BL	EC:2.7.1.184	0.750396	0.996109	Inf				R2	EC:2.5.1.55	0.210487	0.363232	-0.0902419				R4	EC:2.5.1.3	0.739976	0.998145	-0.127056
BL	EC:2.7.1.19	0.579702	0.996109	Inf				R2	EC:2.5.1.56	0.267754	0.434483	0.330295				R4	EC:2.5.1.30	0.537783	0.998145	-0.11326
BL	EC:2.7.1.2	0.67836	0.996109	-0.174107				R2	EC:2.5.1.6	0.213772	0.366101	0.156428				R4	EC:2.5.1.31	0.976704	0.998145	-0.149437
BL	EC:2.7.1.21	0.307781	0.996109	-0.0749863				R2	EC:2.5.1.61	0.22886	0.385023	0.407406				R4	EC:2.5.1.32	0.243931	0.965993	-0.78836
BL	EC:2.7.1.22	0.579702	0.996109	Inf				R2	EC:2.5.1.68	1	NA	-1				R4	EC:2.5.1.39	0.851752	0.998145	-0.133952
BL	EC:2.7.1.23	0.190548	0.996109	-0.141448				R2	EC:2.5.1.7	0.0182939	0.109572	0.227326				R4	EC:2.5.1.44	0.576881	0.998145	-0.84127
BL	EC:2.7.1.24	0.669409	0.996109	-0.145652				R2	EC:2.5.1.72	0.143646	0.292405	0.0232247				R4	EC:2.5.1.46	0.614766	0.998145	Inf
BL	EC:2.7.1.25	0.976898	0.996944	-0.207627				R2	EC:2.5.1.74	0.095605	0.229292	-0.184027				R4	EC:2.5.1.47	0.114749	0.903833	-0.123253
BL	EC:2.7.1.26	0.743969	0.996109	-0.149705				R2	EC:2.5.1.75	0.0375736	0.162204	0.0332501				R4	EC:2.5.1.48	0.221315	0.953217	-0.936999
BL	EC:2.7.1.27	0.750396	0.996109	Inf				R2	EC:2.5.1.76	0.52386	0.653615	0.210856				R4	EC:2.5.1.49	0.0616584	0.903833	-0.102729
BL	EC:2.7.1.29	0.721744	0.996109	14.6667				R2	EC:2.5.1.78	0.245686	0.406207	-0.00531881				R4	EC:2.5.1.54	0.431828	0.998145	-0.211704
BL	EC:2.7.1.30	0.506668	0.996109	-0.198335				R2	EC:2.5.1.84	0.845278	NA	Inf				R4	EC:2.5.1.55	0.944232	0.998145	-0.129722
BL	EC:2.7.1.31	0.954418	0.996109	-0.15349				R2	EC:2.5.1.85	0.845278	NA	Inf				R4	EC:2.5.1.56	0.254062	0.981987	0.156696
BL	EC:2.7.1.33	0.0430541	0.996109	-0.109232				R2	EC:2.5.1.9	0.246068	0.406207	-0.00441952				R4	EC:2.5.1.57	1	NA	-1
BL	EC:2.7.1.35	0.82237	0.996109	-0.138128				R2	EC:2.5.1.90	0.213384	0.365984	-0.0897515				R4	EC:2.5.1.6	0.230962	0.953217	-0.126956
BL	EC:2.7.1.36	0.352025	0.996109	-0.378109				R2	EC:2.5.1.97	0.00702603	0.0779922	0.89169				R4	EC:2.5.1.61	0.395556	0.998145	-0.240513
BL	EC:2.7.1.39	0.434281	0.996109	-0.0986783				R2	EC:2.6.1.1	0.772116	0.852607	0.123001				R4	EC:2.5.1.68	1	NA	-1
BL	EC:2.7.1.4	0.635909	0.996109	-0.12346				R2	EC:2.6.1.102	0.650081	0.760834	0.142507				R4	EC:2.5.1.7	0.0415989	0.903833	-0.111053
BL	EC:2.7.1.40	0.207663	0.996109	-0.14161				R2	EC:2.6.1.11	0.00303646	0.0665129	0.185318				R4	EC:2.5.1.72	0.904362	0.998145	-0.143277
BL	EC:2.7.1.45	0.620987	0.996109	-0.183749				R2	EC:2.6.1.13	0.845278	NA	-0.904762				R4	EC:2.5.1.74	0.914444	0.998145	-0.128768
BL	EC:2.7.1.48	0.0410245	0.996109	-0.100138				R2	EC:2.6.1.16	0.940048	0.960192	0.13044				R4	EC:2.5.1.75	0.306189	0.998145	-0.122692
BL	EC:2.7.1.49	0.834298	0.996109	-0.155071				R2	EC:2.6.1.17	0.0149818	0.0994933	0.457337				R4	EC:2.5.1.76	0.962228	0.998145	-0.0832563
BL	EC:2.7.1.5	0.857772	0.996109	-0.165594				R2	EC:2.6.1.18	1	NA	-1				R4	EC:2.5.1.78	0.854147	0.998145	-0.139599
BL	EC:2.7.1.50	0.464802	0.996109	-0.115749				R2	EC:2.6.1.19	0.794059	0.870118	0.14				R4	EC:2.5.1.9	0.860914	0.998145	-0.13985
BL	EC:2.7.1.51	0.164641	0.996109	-0.324711				R2	EC:2.6.1.2	0.0705367	0.207974	-0.55005				R4	EC:2.5.1.90	0.927442	0.998145	-0.126562
BL	EC:2.7.1.53	0.579702	0.996109	Inf				R2	EC:2.6.1.21	0.0477772	0.17832	-0.325062				R4	EC:2.5.1.97	0.117477	0.903833	0.125588
BL	EC:2.7.1.55	0.750396	0.996109	Inf				R2	EC:2.6.1.22	0.167308	0.324106	-1				R4	EC:2.6.1.1	0.341379	0.998145	-0.127942
BL	EC:2.7.1.56	0.583637	0.996109	-0.0906576				R2	EC:2.6.1.36	0.518992	NA	-1				R4	EC:2.6.1.102	0.471723	0.998145	0.154957
BL	EC:2.7.1.58	0.237172	0.996109	0.37037				R2	EC:2.6.1.37	0.0930759	0.224957	-0.329918				R4	EC:2.6.1.11	0.0253175	0.903833	-0.115168
BL	EC:2.7.1.59	0.331583	0.996109	Inf				R2	EC:2.6.1.42	0.123027	0.263071	0.154967				R4	EC:2.6.1.13	1	NA	-1
BL	EC:2.7.1.6	0.271829	0.996109	-0.128252				R2	EC:2.6.1.44	0.708194	NA	-1				R4	EC:2.6.1.16	0.274349	0.998145	-0.131955
BL	EC:2.7.1.60	0.502019	0.996109	Inf				R2	EC:2.6.1.45	0.708194	NA	-1				R4	EC:2.6.1.17	0.534439	0.998145	-0.126271
BL	EC:2.7.1.63	0.856182	0.996109	0.360825				R2	EC:2.6.1.48	1	NA	-1				R4	EC:2.6.1.18	0.92752	0.998145	-0.994273
BL	EC:2.7.1.66	0.338896	0.996109	0.220323				R2	EC:2.6.1.51	0.708194	NA	-1				R4	EC:2.6.1.19	0.934187	0.998145	-0.796068
BL	EC:2.7.1.69	0.382644	0.996109	-0.237778				R2	EC:2.6.1.52	0.00210722	0.0573965	0.187225				R4	EC:2.6.1.2	0.405759	0.998145	-0.861298
BL	EC:2.7.1.71	0.429104	0.996109	-0.179332				R2	EC:2.6.1.55	0.526489	0.653615	-0.279398				R4	EC:2.6.1.21	0.144416	0.903833	-0.463602
BL	EC:2.7.1.73	0.354121	0.996109	Inf				R2	EC:2.6.1.57	0.567821	0.689982	0.133621				R4	EC:2.6.1.22	0.746147	0.998145	-0.998306
BL	EC:2.7.1.74	0.786285	0.996109	13				R2	EC:2.6.1.59	0.00744741	0.0781637	0.881707				R4	EC:2.6.1.37	0.322206	0.998145	-0.000501922
BL	EC:2.7.1.76	0.873797	0.996109	-0.326223				R2	EC:2.6.1.62	0.0302386	0.144741	-0.413963				R4	EC:2.6.1.42	0.385723	0.998145	-0.136797
BL	EC:2.7.1.8	0.662859	0.996109	Inf				R2	EC:2.6.1.66	0.0697804	0.20681	-0.550296				R4	EC:2.6.1.48	0.92752	0.998145	-0.98916
BL	EC:2.7.1.83	0.91218	0.996109	-0.212				R2	EC:2.6.1.76	0.845278	NA	-0.92				R4	EC:2.6.1.52	0.0205543	0.903833	-0.114734
BL	EC:2.7.1.89	0.579702	0.996109	Inf				R2	EC:2.6.1.81	0.615012	NA	-1				R4	EC:2.6.1.55	0.644911	0.998145	0.0732054
BL	EC:2.7.1.90	0.488178	0.996109	0.00634083				R2	EC:2.6.1.82	0.0412772	0.168794	1.30841				R4	EC:2.6.1.57	0.206523	0.941367	-0.906288
BL	EC:2.7.1.92	0.915994	0.996109	-0.239583				R2	EC:2.6.1.83	0.118737	0.257965	0.220084				R4	EC:2.6.1.59	0.342941	0.998145	-0.0260861
BL	EC:2.7.1.95	0.409367	0.996109	-0.372475				R2	EC:2.6.1.84	1	NA	-1				R4	EC:2.6.1.62	0.748794	0.998145	-0.114646
BL	EC:2.7.11.1	0.470003	0.996109	-0.188377				R2	EC:2.6.1.85	0.807434	0.87676	0.149111				R4	EC:2.6.1.66	0.408672	0.998145	-0.912751
BL	EC:2.7.11.5	0.503422	0.996109	2.5				R2	EC:2.6.1.87	0.615012	NA	-1				R4	EC:2.6.1.76	0.92752	0.998145	-0.993425
BL	EC:2.7.13.3	0.862583	0.996109	-0.166228				R2	EC:2.6.1.9	0.00373417	0.0678077	0.186943				R4	EC:2.6.1.81	1	NA	-1
BL	EC:2.7.14.1	0.338756	0.996109	-0.359049				R2	EC:2.6.99.2	0.202197	0.355867	-0.0975132				R4	EC:2.6.1.82	0.0612756	0.903833	-0.768415
BL	EC:2.7.2.1	0.611162	0.996109	-0.148613				R2	EC:2.7.1.1	0.78235	NA	-1				R4	EC:2.6.1.83	0.146109	0.903833	-0.0831916
BL	EC:2.7.2.11	0.328589	0.996109	-0.116953				R2	EC:2.7.1.100	0.675817	0.778253	-0.0824176				R4	EC:2.6.1.84	0.568461	0.998145	-0.851852
BL	EC:2.7.2.15	0.750396	0.996109	Inf				R2	EC:2.7.1.107	0.0173317	0.107742	-0.132445				R4	EC:2.6.1.85	0.47231	0.998145	-0.225687
BL	EC:2.7.2.2	0.193041	0.996109	-0.280648				R2	EC:2.7.1.11	0.0404208	0.168151	0.244046				R4	EC:2.6.1.87	1	NA	-1
BL	EC:2.7.2.3	0.189854	0.996109	-0.141427				R2	EC:2.7.1.113	0.487958	NA	-0.935484				R4	EC:2.6.1.9	0.064265	0.903833	-0.12609
BL	EC:2.7.2.4	0.936274	0.996109	-0.153806				R2	EC:2.7.1.12	0.000928514	0.0379364	-0.929345				R4	EC:2.6.1.92	0.911304	0.998145	-1
BL	EC:2.7.2.7	0.452071	0.996109	-0.235352				R2	EC:2.7.1.13	1	NA	-1				R4	EC:2.6.99.2	0.914014	0.998145	-0.122606
BL	EC:2.7.2.8	0.563345	0.996109	-0.150335				R2	EC:2.7.1.130	0.199317	0.354458	-0.0979639				R4	EC:2.7.1.1	0.904379	0.998145	-1
BL	EC:2.7.3.9	0.434072	0.996109	-0.185285				R2	EC:2.7.1.14	0.381578	0.550473	-0.282353				R4	EC:2.7.1.100	0.339223	0.998145	-0.6585
BL	EC:2.7.4.1	0.888925	0.996109	-0.154174				R2	EC:2.7.1.144	0.184882	0.345032	-0.419048				R4	EC:2.7.1.107	0.754041	0.998145	-0.126098
BL	EC:2.7.4.14	0.598521	0.996109	-0.174125				R2	EC:2.7.1.146	0.00812438	0.0809589	2.45283				R4	EC:2.7.1.11	0.83855	0.998145	-0.147698
BL	EC:2.7.4.16	0.880256	0.996109	-0.181395				R2	EC:2.7.1.147	0.00812438	0.0809589	2.45283				R4	EC:2.7.1.113	0.693715	0.998145	-1
BL	EC:2.7.4.2	0.352025	0.996109	-0.378109				R2	EC:2.7.1.148	0.014602	0.0994933	0.16256				R4	EC:2.7.1.12	0.638351	0.998145	-0.478323
BL	EC:2.7.4.22	0.189854	0.996109	-0.141427				R2	EC:2.7.1.15	0.493263	0.6312	0.213985				R4	EC:2.7.1.13	0.92752	0.998145	-0.960317
BL	EC:2.7.4.23	0.934316	0.996109	0				R2	EC:2.7.1.156	0.0586384	0.191118	0.379456				R4	EC:2.7.1.130	0.937357	0.998145	-0.127404
BL	EC:2.7.4.3	0.189854	0.996109	-0.141427				R2	EC:2.7.1.16	0.146784	0.297206	0.775862				R4	EC:2.7.1.14	0.996706	0.998815	-0.270153
BL	EC:2.7.4.6	0.511669	0.996109	-0.272391				R2	EC:2.7.1.166	0.874137	NA	-1				R4	EC:2.7.1.144	0.791631	0.998145	-0.144317
BL	EC:2.7.4.7	0.834298	0.996109	-0.155071				R2	EC:2.7.1.167	0.215125	0.367317	-0.807692				R4	EC:2.7.1.146	0.000263599	0.19625	1.33062
BL	EC:2.7.4.8	0.430886	0.996109	-0.126847				R2	EC:2.7.1.168	0.625565	0.740068	-0.0789047				R4	EC:2.7.1.147	0.000263599	0.19625	1.33062
BL	EC:2.7.4.9	0.41101	0.996109	-0.0866925				R2	EC:2.7.1.17	0.968031	0.977579	0.105235				R4	EC:2.7.1.148	0.228586	0.953217	-0.132016
BL	EC:2.7.6.1	0.496363	0.996109	-0.173345				R2	EC:2.7.1.170	0.276963	0.436969	-0.677419				R4	EC:2.7.1.15	0.338332	0.998145	-0.242337
BL	EC:2.7.6.2	0.657363	0.996109	-0.118694				R2	EC:2.7.1.175	1	NA	-1				R4	EC:2.7.1.156	0.895559	0.998145	-0.20184
BL	EC:2.7.6.3	0.788401	0.996109	-0.135115				R2	EC:2.7.1.176	0.64203	0.753315	-0.159091				R4	EC:2.7.1.16	0.155281	0.903833	-0.962194
BL	EC:2.7.6.5	0.54711	0.996109	-0.175756				R2	EC:2.7.1.177	0.78235	NA	-1				R4	EC:2.7.1.162	0.763369	0.998145	Inf
BL	EC:2.7.7.1	0.189395	0.996109	-0.373874				R2	EC:2.7.1.182	1	NA	-1				R4	EC:2.7.1.166	0.765069	0.998145	-1
BL	EC:2.7.7.12	0.771249	0.996109	-0.169166				R2	EC:2.7.1.184	0.615012	NA	-1				R4	EC:2.7.1.167	0.7788	0.998145	-0.995068
BL	EC:2.7.7.13	0.827608	0.996109	-0.172912				R2	EC:2.7.1.19	0.615012	NA	-1				R4	EC:2.7.1.168	0.653523	0.998145	-0.241767
BL	EC:2.7.7.15	0.426937	0.996109	0.266667				R2	EC:2.7.1.2	0.00521068	0.0749877	-0.0409963				R4	EC:2.7.1.17	0.296822	0.998145	-0.270093
BL	EC:2.7.7.18	0.171521	0.996109	-0.140965				R2	EC:2.7.1.20	1	NA	-1				R4	EC:2.7.1.170	0.938708	0.998145	-0.997454
BL	EC:2.7.7.19	0.700448	0.996109	-0.121022				R2	EC:2.7.1.21	0.0697178	0.20681	-0.190051				R4	EC:2.7.1.175	1	NA	-1
BL	EC:2.7.7.2	0.743969	0.996109	-0.149705				R2	EC:2.7.1.22	0.560311	NA	-1				R4	EC:2.7.1.176	0.796374	0.998145	-0.0166028
BL	EC:2.7.7.23	0.335553	0.996109	-0.0849722				R2	EC:2.7.1.23	0.479418	0.620089	0.137419				R4	EC:2.7.1.177	0.547438	0.998145	-1
BL	EC:2.7.7.24	0.651131	0.996109	-0.144335				R2	EC:2.7.1.24	0.673866	0.778253	0.121056				R4	EC:2.7.1.182	0.576881	0.998145	-0.84127
BL	EC:2.7.7.27	0.663765	0.996109	-0.189122				R2	EC:2.7.1.25	0.522004	0.653615	0.378299				R4	EC:2.7.1.184	1	NA	-1
BL	EC:2.7.7.3	0.189854	0.996109	-0.141427				R2	EC:2.7.1.26	0.436785	0.610112	0.150085				R4	EC:2.7.1.19	1	NA	-1
BL	EC:2.7.7.33	0.570243	0.996109	-0.239526				R2	EC:2.7.1.29	0.282202	NA	-0.882353				R4	EC:2.7.1.2	0.394484	0.998145	-0.184892
BL	EC:2.7.7.38	0.885301	0.996109	-0.176207				R2	EC:2.7.1.30	0.613079	0.728383	0.177327				R4	EC:2.7.1.20	1	NA	-1
BL	EC:2.7.7.39	0.761008	0.996109	-0.208362				R2	EC:2.7.1.31	0.0823206	0.221879	0.0283818				R4	EC:2.7.1.21	0.922109	0.998145	-0.168213
BL	EC:2.7.7.4	0.345171	0.996109	-0.353377				R2	EC:2.7.1.33	0.0415513	0.168794	0.176599				R4	EC:2.7.1.22	1	NA	-1
BL	EC:2.7.7.41	0.190746	0.996109	-0.141445				R2	EC:2.7.1.35	0.0767211	0.218331	0.38954				R4	EC:2.7.1.23	0.149841	0.903833	-0.125382
BL	EC:2.7.7.42	0.881224	0.996109	0.40404				R2	EC:2.7.1.36	0.00899768	0.0820302	-0.927588				R4	EC:2.7.1.24	0.132516	0.903833	-0.123972
BL	EC:2.7.7.43	0.745819	0.996109	-0.228924				R2	EC:2.7.1.39	0.100813	0.233609	0.369738				R4	EC:2.7.1.25	0.661152	0.998145	-0.908991
BL	EC:2.7.7.47	0.291338	0.996109	2.2				R2	EC:2.7.1.4	0.0127181	0.0994933	-0.0309577				R4	EC:2.7.1.26	0.566544	0.998145	-0.11769
BL	EC:2.7.7.49	0.408901	0.996109	-0.50625				R2	EC:2.7.1.40	0.667264	0.774126	0.140107				R4	EC:2.7.1.29	0.951458	0.998145	-0.925214
BL	EC:2.7.7.53	0.318189	0.996109	0.7173				R2	EC:2.7.1.45	0.232473	0.390034	0.0137516				R4	EC:2.7.1.30	0.305422	0.998145	-0.232691
BL	EC:2.7.7.56	0.0417574	0.996109	0.166655				R2	EC:2.7.1.48	0.164194	0.319452	0.0642735				R4	EC:2.7.1.31	0.966865	0.998145	-0.181577
BL	EC:2.7.7.58	0.579702	0.996109	Inf				R2	EC:2.7.1.49	0.426109	0.601071	0.0811821				R4	EC:2.7.1.33	0.23747	0.960851	-0.128962
BL	EC:2.7.7.59	0.935602	0.996109	0.294643				R2	EC:2.7.1.5	0.316699	0.480509	0.030701				R4	EC:2.7.1.35	0.839266	0.998145	-0.172248
BL	EC:2.7.7.6	0.356475	0.996109	-0.143967				R2	EC:2.7.1.50	0.305747	0.466366	0.287538				R4	EC:2.7.1.36	0.439618	0.998145	0.536286
BL	EC:2.7.7.60	0.539572	0.996109	-0.140975				R2	EC:2.7.1.51	0.738481	0.825829	0.138433				R4	EC:2.7.1.39	0.700945	0.998145	-0.125067
BL	EC:2.7.7.61	0.332736	0.996109	-0.355664				R2	EC:2.7.1.53	0.615012	NA	-1				R4	EC:2.7.1.4	0.946557	0.998145	-0.167349
BL	EC:2.7.7.62	0.735893	0.996109	-0.131617				R2	EC:2.7.1.56	0.375758	0.544136	0.258578				R4	EC:2.7.1.40	0.477463	0.998145	-0.143721
BL	EC:2.7.7.63	0.309186	0.996109	-0.0640341				R2	EC:2.7.1.58	0.613984	0.728628	-0.333333				R4	EC:2.7.1.45	0.708681	0.998145	-0.197724
BL	EC:2.7.7.65	0.740595	0.996109	0.5				R2	EC:2.7.1.59	0.560311	NA	-1				R4	EC:2.7.1.48	0.486216	0.998145	-0.137516
BL	EC:2.7.7.66	0.323198	0.996109	-0.733333				R2	EC:2.7.1.6	0.298927	0.457794	0.103718				R4	EC:2.7.1.49	0.257797	0.981987	-0.119333
BL	EC:2.7.7.7	0.175186	0.996109	-0.140852				R2	EC:2.7.1.60	0.560311	NA	-1				R4	EC:2.7.1.5	0.955502	0.998145	-0.184962
BL	EC:2.7.7.70	0.828274	0.996109	-0.35				R2	EC:2.7.1.63	0.0456936	0.1766	-0.979899				R4	EC:2.7.1.50	0.595085	0.998145	-0.226035
BL	EC:2.7.7.71	0.371693	0.996109	-0.411445				R2	EC:2.7.1.66	0.804165	0.875324	0.467866				R4	EC:2.7.1.51	0.0866877	0.903833	-0.437758
BL	EC:2.7.7.72	0.826	0.996109	-0.168283				R2	EC:2.7.1.69	0.00039017	0.0223177	-0.176933				R4	EC:2.7.1.52	0.751444	0.998145	-0.93994
BL	EC:2.7.7.73	0.834403	0.996109	1.10612				R2	EC:2.7.1.71	0.03513	0.157603	0.22324				R4	EC:2.7.1.53	1	NA	-1
BL	EC:2.7.7.75	0.579702	0.996109	Inf				R2	EC:2.7.1.73	0.615012	NA	-1				R4	EC:2.7.1.55	0.693715	0.998145	-1
BL	EC:2.7.7.76	0.973827	0.996944	-0.165521				R2	EC:2.7.1.74	0.487958	NA	-0.935484				R4	EC:2.7.1.56	0.585971	0.998145	-0.124371
BL	EC:2.7.7.77	0.358461	0.996109	-0.407171				R2	EC:2.7.1.76	0.00621781	0.0779922	-0.935541				R4	EC:2.7.1.58	0.942015	0.998145	-0.990184
BL	EC:2.7.7.8	0.124598	0.996109	-0.139459				R2	EC:2.7.1.83	0.348055	0.517111	0.323398				R4	EC:2.7.1.59	1	NA	-1
BL	EC:2.7.7.82	0.518948	0.996109	-0.377622				R2	EC:2.7.1.89	0.615012	NA	-1				R4	EC:2.7.1.6	0.312052	0.998145	-0.134683
BL	EC:2.7.7.83	0.8899	0.996109	-0.183667				R2	EC:2.7.1.90	0.0559279	0.185454	-0.36101				R4	EC:2.7.1.60	1	NA	-1
BL	EC:2.7.7.85	0.792672	0.996109	-0.137295				R2	EC:2.7.1.92	0.9512	0.966548	-0.121447				R4	EC:2.7.1.63	0.0896782	0.903833	-0.981343
BL	EC:2.7.7.87	0.199719	0.996109	-0.141979				R2	EC:2.7.1.95	0.00815703	0.0809589	-0.934046				R4	EC:2.7.1.66	0.539126	0.998145	-0.222303
BL	EC:2.7.7.9	0.789618	0.996109	-0.100662				R2	EC:2.7.10.1	0.518992	NA	-1				R4	EC:2.7.1.69	0.00344617	0.725914	-0.382528
BL	EC:2.7.8.12	0.709217	0.996109	-0.25298				R2	EC:2.7.11.1	0.050602	0.181857	0.298855				R4	EC:2.7.1.71	0.503821	0.998145	-0.139881
BL	EC:2.7.8.13	0.164097	0.996109	-0.140798				R2	EC:2.7.11.5	0.615012	NA	-1				R4	EC:2.7.1.72	1	NA	-1
BL	EC:2.7.8.14	0.37941	0.996109	0.0894942				R2	EC:2.7.13.3	0.0290024	0.141859	0.300053				R4	EC:2.7.1.73	1	NA	-1
BL	EC:2.7.8.20	0.324434	0.996109	-0.330587				R2	EC:2.7.14.1	0.0514218	0.181857	-0.355859				R4	EC:2.7.1.74	0.693715	0.998145	-1
BL	EC:2.7.8.24	0.878172	0.996109	-1				R2	EC:2.7.2.1	0.0782151	0.221879	0.0897677				R4	EC:2.7.1.76	0.518828	0.998145	0.515315
BL	EC:2.7.8.26	0.730595	0.996109	-0.131051				R2	EC:2.7.2.11	0.69172	0.794506	0.163417				R4	EC:2.7.1.83	0.81724	0.998145	-0.291167
BL	EC:2.7.8.33	0.0480571	0.996109	0.148251				R2	EC:2.7.2.15	0.615012	NA	-1				R4	EC:2.7.1.85	1	NA	-1
BL	EC:2.7.8.37	0.971732	0.996944	7				R2	EC:2.7.2.2	0.98818	0.990077	0.117346				R4	EC:2.7.1.89	1	NA	-1
BL	EC:2.7.8.41	0.56058	0.996109	-0.0255924				R2	EC:2.7.2.3	0.477507	0.620089	0.137515				R4	EC:2.7.1.90	0.857829	0.998145	-0.132908
BL	EC:2.7.8.5	0.986773	0.997132	-0.154775				R2	EC:2.7.2.4	0.0785923	0.221879	0.0529825				R4	EC:2.7.1.92	0.759236	0.998145	-0.183584
BL	EC:2.7.8.6	0.398341	0.996109	0.114804				R2	EC:2.7.2.7	0.355855	0.525288	0.183239				R4	EC:2.7.1.95	0.539717	0.998145	0.431477
BL	EC:2.7.8.7	0.424125	0.996109	-0.25279				R2	EC:2.7.2.8	0.00284708	0.0638638	0.185667				R4	EC:2.7.11.1	0.641388	0.998145	-0.129011
BL	EC:2.7.8.8	0.459728	0.996109	-0.212732				R2	EC:2.7.3.9	0.27518	0.436969	0.236388				R4	EC:2.7.11.5	0.92752	0.998145	-0.999128
BL	EC:2.7.9.1	0.14564	0.996109	-0.139951				R2	EC:2.7.4.1	0.0276146	0.140405	0.176547				R4	EC:2.7.13.3	0.64457	0.998145	-0.144918
BL	EC:2.7.9.2	0.255572	0.996109	-0.492049				R2	EC:2.7.4.14	0.302338	0.462399	0.165713				R4	EC:2.7.14.1	0.159504	0.903833	-0.459211
BL	EC:2.7.9.3	0.663381	0.996109	-0.118261				R2	EC:2.7.4.16	0.511512	0.648028	0.000196979				R4	EC:2.7.2.1	0.989619	0.998145	-0.146395
BL	EC:2.8.1.1	0.211671	0.996109	0.456456				R2	EC:2.7.4.2	0.00899768	0.0820302	-0.927588				R4	EC:2.7.2.11	0.360621	0.998145	-0.13013
BL	EC:2.8.1.10	0.914258	0.996109	-0.168786				R2	EC:2.7.4.22	0.477507	0.620089	0.137515				R4	EC:2.7.2.15	1	NA	-1
BL	EC:2.8.1.12	0.282977	0.996109	-0.466992				R2	EC:2.7.4.23	1	NA	-1				R4	EC:2.7.2.2	0.113809	0.903833	-0.34082
BL	EC:2.8.1.2	0.215852	0.996109	0.453172				R2	EC:2.7.4.3	0.477507	0.620089	0.137515				R4	EC:2.7.2.3	0.146455	0.903833	-0.124733
BL	EC:2.8.1.6	0.916384	0.996109	-0.156254				R2	EC:2.7.4.6	0.472763	0.620089	0.206771				R4	EC:2.7.2.4	0.540381	0.998145	-0.175272
BL	EC:2.8.1.7	0.957044	0.996944	-0.155266				R2	EC:2.7.4.7	0.426109	0.601071	0.0811821				R4	EC:2.7.2.7	0.578102	0.998145	-0.167144
BL	EC:2.8.1.8	0.513125	0.996109	-0.273481				R2	EC:2.7.4.8	0.340644	0.508546	0.108151				R4	EC:2.7.2.8	0.0230834	0.903833	-0.114128
BL	EC:2.8.2.22	0.750396	0.996109	Inf				R2	EC:2.7.4.9	0.474674	0.620089	0.208755				R4	EC:2.7.3.9	0.716288	0.998145	-0.189011
BL	EC:2.8.3.1	0.796349	0.996109	-0.123902				R2	EC:2.7.6.1	0.253831	0.416617	0.164176				R4	EC:2.7.4.1	0.0155625	0.903833	-0.110626
BL	EC:2.8.3.10	0.328006	0.996109	-0.386669				R2	EC:2.7.6.2	0.461703	0.620089	0.214185				R4	EC:2.7.4.14	0.76487	0.998145	-0.14926
BL	EC:2.8.3.12	0.586411	0.996109	0.0107431				R2	EC:2.7.6.3	0.119452	0.258323	-0.00473047				R4	EC:2.7.4.16	0.916931	0.998145	-0.106914
BL	EC:2.8.3.16	0.281371	0.996109	-0.366914				R2	EC:2.7.6.5	0.179588	0.34071	0.147895				R4	EC:2.7.4.2	0.439618	0.998145	0.536286
BL	EC:2.8.3.18	0.878172	0.996109	-1				R2	EC:2.7.7.1	0.627391	0.740697	0.341159				R4	EC:2.7.4.22	0.148356	0.903833	-0.125108
BL	EC:2.8.3.19	0.61588	0.996109	-0.0300319				R2	EC:2.7.7.12	0.46843	0.620089	0.229721				R4	EC:2.7.4.23	0.92752	0.998145	-0.992568
BL	EC:2.8.3.21	0.358564	0.996109	0.230769				R2	EC:2.7.7.13	0.97432	0.981181	0.111319				R4	EC:2.7.4.3	0.148356	0.903833	-0.125108
BL	EC:2.8.3.22	0.878172	0.996109	-1				R2	EC:2.7.7.15	0.00846695	0.0809589	2.1134				R4	EC:2.7.4.6	0.804397	0.998145	-0.145521
BL	EC:2.8.3.5	0.914533	0.996109	0				R2	EC:2.7.7.18	0.404637	0.577188	0.139677				R4	EC:2.7.4.7	0.257797	0.981987	-0.119333
BL	EC:2.8.3.8	0.493875	0.996109	-0.0555168				R2	EC:2.7.7.19	0.158202	0.310328	-0.135011				R4	EC:2.7.4.8	0.731093	0.998145	-0.136203
BL	EC:2.8.3.9	0.494732	0.996109	-0.0556911				R2	EC:2.7.7.2	0.436785	0.610112	0.150085				R4	EC:2.7.4.9	0.901061	0.998145	-0.131724
BL	EC:2.8.4.3	0.823427	0.996109	-0.153713				R2	EC:2.7.7.23	0.0793749	0.221879	0.430387				R4	EC:2.7.6.1	0.364767	0.998145	-0.129234
BL	EC:2.8.4.4	0.562691	0.996109	-0.15067				R2	EC:2.7.7.24	0.948306	0.966548	0.128697				R4	EC:2.7.6.2	0.959625	0.998145	-0.167349
BL	EC:2.8.4.5	0.0526585	0.996109	-0.117574				R2	EC:2.7.7.27	0.0874298	0.221879	0.324373				R4	EC:2.7.6.3	0.671397	0.998145	-0.126142
BL	EC:2.9.1.1	0.0219189	0.996109	-0.368671				R2	EC:2.7.7.3	0.477507	0.620089	0.137515				R4	EC:2.7.6.5	0.260056	0.985303	-0.121827
BL	EC:3.1.1.1	0.372007	0.996109	2.06667				R2	EC:2.7.7.33	0.0198682	0.115965	0.41543				R4	EC:2.7.7.1	0.0652054	0.903833	-0.498886
BL	EC:3.1.1.11	0.155262	0.996109	0.824324				R2	EC:2.7.7.38	0.184546	0.344968	-0.0945304				R4	EC:2.7.7.12	0.733969	0.998145	-0.194191
BL	EC:3.1.1.17	0.934316	0.996109	0				R2	EC:2.7.7.39	0.0331128	0.151524	-0.367739				R4	EC:2.7.7.13	0.222506	0.953217	-0.108924
BL	EC:3.1.1.24	0.878172	0.996109	-1				R2	EC:2.7.7.4	0.707078	0.805223	0.214439				R4	EC:2.7.7.15	0.097721	0.903833	0.300654
BL	EC:3.1.1.29	0.183715	0.996109	-0.141657				R2	EC:2.7.7.41	0.480773	0.620089	0.137352				R4	EC:2.7.7.18	0.137923	0.903833	-0.124609
BL	EC:3.1.1.3	0.386263	0.996109	-0.395885				R2	EC:2.7.7.42	0.0071299	0.0779922	-0.977707				R4	EC:2.7.7.19	0.994636	0.998145	-0.146261
BL	EC:3.1.1.31	0.436114	0.996109	-0.223666				R2	EC:2.7.7.43	0.0307142	0.145797	0.655721				R4	EC:2.7.7.2	0.566544	0.998145	-0.11769
BL	EC:3.1.1.32	0.608294	0.996109	-0.0226707				R2	EC:2.7.7.47	0.028845	0.141859	3.35714				R4	EC:2.7.7.23	0.681625	0.998145	-0.129505
BL	EC:3.1.1.4	0.608294	0.996109	-0.0226707				R2	EC:2.7.7.49	0.046912	0.178297	-0.196524				R4	EC:2.7.7.24	0.159974	0.903833	-0.126233
BL	EC:3.1.1.41	0.8416	0.996109	0.5				R2	EC:2.7.7.53	0.148574	0.299241	0.892157				R4	EC:2.7.7.27	0.910376	0.998145	-0.157699
BL	EC:3.1.1.45	0.547261	0.996109	3				R2	EC:2.7.7.56	0.0220649	0.125915	0.748743				R4	EC:2.7.7.3	0.148356	0.903833	-0.125108
BL	EC:3.1.1.5	0.951093	0.996109	-0.1875				R2	EC:2.7.7.58	0.390201	NA	-1				R4	EC:2.7.7.33	0.382431	0.998145	-0.0295219
BL	EC:3.1.1.53	0.631392	0.996109	-0.0313436				R2	EC:2.7.7.59	0.00832424	0.0809589	-0.97293				R4	EC:2.7.7.38	0.934735	0.998145	-0.157769
BL	EC:3.1.1.61	0.984452	0.996944	-0.15988				R2	EC:2.7.7.6	0.191754	0.347649	0.154962				R4	EC:2.7.7.39	0.164096	0.903833	0.338485
BL	EC:3.1.1.85	0.610245	0.996109	-0.0231682				R2	EC:2.7.7.60	0.00136473	0.0425788	0.256655				R4	EC:2.7.7.4	0.438576	0.998145	-0.280692
BL	EC:3.1.11.1	0.503422	0.996109	2.5				R2	EC:2.7.7.61	0.223124	0.37838	-0.239493				R4	EC:2.7.7.41	0.154066	0.903833	-0.126061
BL	EC:3.1.11.2	0.449251	0.996109	-0.106183				R2	EC:2.7.7.62	0.0586384	0.191118	0.379456				R4	EC:2.7.7.42	0.120756	0.903833	-0.993525
BL	EC:3.1.11.3	0.750396	0.996109	Inf				R2	EC:2.7.7.63	0.0152878	0.0994933	-0.164835				R4	EC:2.7.7.43	0.159747	0.903833	0.110964
BL	EC:3.1.11.5	0.654024	0.996109	-0.153152				R2	EC:2.7.7.65	0.332567	NA	-1				R4	EC:2.7.7.47	0.295171	0.998145	-0.869281
BL	EC:3.1.11.6	0.182077	0.996109	-0.14135				R2	EC:2.7.7.66	0.845126	0.898591	-0.4				R4	EC:2.7.7.49	0.424129	0.998145	-0.656914
BL	EC:3.1.12.1	0.804171	0.996109	-0.124523				R2	EC:2.7.7.68	1	NA	-1				R4	EC:2.7.7.53	0.433484	0.998145	-0.44007
BL	EC:3.1.13.1	0.872121	0.996109	0.333333				R2	EC:2.7.7.7	0.213235	0.365984	0.150155				R4	EC:2.7.7.56	0.860745	0.998145	-0.225948
BL	EC:3.1.13.3	0.246767	0.996109	-0.14327				R2	EC:2.7.7.70	0.215125	0.367317	-0.807692				R4	EC:2.7.7.58	1	NA	-1
BL	EC:3.1.13.5	0.239578	0.996109	-0.491508				R2	EC:2.7.7.71	0.0858752	0.221879	-0.421196				R4	EC:2.7.7.59	0.0848634	0.903833	-0.990614
BL	EC:3.1.2.12	0.503422	0.996109	2.5				R2	EC:2.7.7.72	0.48273	0.621196	0.18734				R4	EC:2.7.7.6	0.263123	0.985868	-0.137204
BL	EC:3.1.2.21	0.353057	0.996109	-0.379353				R2	EC:2.7.7.73	0.630792	0.743178	0.335616				R4	EC:2.7.7.60	0.0339458	0.903833	-0.0918354
BL	EC:3.1.2.23	0.878172	0.996109	-1				R2	EC:2.7.7.75	0.454679	NA	-1				R4	EC:2.7.7.61	0.127511	0.903833	-0.454874
BL	EC:3.1.2.28	0.404616	0.996109	0.12963				R2	EC:2.7.7.76	0.183145	0.344035	-0.0428976				R4	EC:2.7.7.62	0.895559	0.998145	-0.20184
BL	EC:3.1.2.6	0.246729	0.996109	-0.51428				R2	EC:2.7.7.77	0.968179	0.977579	0.184757				R4	EC:2.7.7.63	0.592792	0.998145	-0.243301
BL	EC:3.1.21.1	0.503422	0.996109	2.5				R2	EC:2.7.7.8	0.0146472	0.0994933	0.162532				R4	EC:2.7.7.65	0.784178	0.998145	-0.999039
BL	EC:3.1.21.2	0.141585	0.996109	-0.134901				R2	EC:2.7.7.82	0.902107	0.931417	0.157143				R4	EC:2.7.7.66	0.478377	0.998145	-0.8738
BL	EC:3.1.21.3	0.362014	0.996109	-0.107987				R2	EC:2.7.7.83	0.003635	0.0678077	0.887318				R4	EC:2.7.7.68	1	NA	-1
BL	EC:3.1.21.4	0.512285	0.996109	-0.303237				R2	EC:2.7.7.85	0.0968302	0.230078	0.33038				R4	EC:2.7.7.7	0.123278	0.903833	-0.127289
BL	EC:3.1.21.5	0.412624	0.996109	-0.00228311				R2	EC:2.7.7.87	0.235244	0.392874	0.144428				R4	EC:2.7.7.70	0.7788	0.998145	-0.995068
BL	EC:3.1.21.7	0.93311	0.996109	-0.322581				R2	EC:2.7.7.9	0.258728	0.421631	0.0211155				R4	EC:2.7.7.71	0.18034	0.903833	-0.506633
BL	EC:3.1.22.4	0.332454	0.996109	-0.0885854				R2	EC:2.7.8.12	0.509733	0.646491	-0.0418535				R4	EC:2.7.7.72	0.466128	0.998145	-0.211817
BL	EC:3.1.26.11	0.353345	0.996109	-0.191065				R2	EC:2.7.8.13	0.448809	0.620089	0.139357				R4	EC:2.7.7.73	0.762983	0.998145	-0.658444
BL	EC:3.1.26.12	0.881224	0.996109	0.40404				R2	EC:2.7.8.14	0.797155	0.871841	0.393548				R4	EC:2.7.7.75	0.911304	0.998145	-1
BL	EC:3.1.26.3	0.189854	0.996109	-0.141427				R2	EC:2.7.8.20	0.0519564	0.181857	-0.210157				R4	EC:2.7.7.76	0.0590567	0.903833	-0.433012
BL	EC:3.1.26.4	0.22627	0.996109	-0.142221				R2	EC:2.7.8.24	1	NA	-1				R4	EC:2.7.7.77	0.318637	0.998145	-0.336251
BL	EC:3.1.26.5	0.201466	0.996109	-0.142052				R2	EC:2.7.8.26	0.0605035	0.19458	0.378381				R4	EC:2.7.7.8	0.229124	0.953217	-0.131997
BL	EC:3.1.26.8	0.0362594	0.996109	0.116686				R2	EC:2.7.8.28	0.518992	NA	-1				R4	EC:2.7.7.82	0.587695	0.998145	-0.358438
BL	EC:3.1.27.1	0.878172	0.996109	-1				R2	EC:2.7.8.33	0.166139	0.322687	0.439065				R4	EC:2.7.7.83	0.16751	0.903833	0.0535269
BL	EC:3.1.27.6	0.750396	0.996109	Inf				R2	EC:2.7.8.37	0.845278	NA	Inf				R4	EC:2.7.7.85	0.540586	0.998145	-0.119788
BL	EC:3.1.3.1	0.613795	0.996109	-0.111379				R2	EC:2.7.8.41	0.526557	0.653615	0.0208398				R4	EC:2.7.7.87	0.111732	0.903833	-0.121493
BL	EC:3.1.3.10	0.662623	0.996109	3				R2	EC:2.7.8.5	0.120378	0.259345	0.311852				R4	EC:2.7.7.9	0.469948	0.998145	-0.271681
BL	EC:3.1.3.11	0.287037	0.996109	-0.221852				R2	EC:2.7.8.6	0.635823	0.746798	0.601382				R4	EC:2.7.8.12	0.472734	0.998145	0.0148387
BL	EC:3.1.3.12	0.647389	0.996109	-0.0337198				R2	EC:2.7.8.7	0.00681707	0.0779922	-0.198297				R4	EC:2.7.8.13	0.131183	0.903833	-0.124538
BL	EC:3.1.3.15	0.351559	0.996109	-0.130959				R2	EC:2.7.8.8	0.146117	0.296379	-0.0174337				R4	EC:2.7.8.14	0.201186	0.941367	0.214119
BL	EC:3.1.3.16	0.997564	0.998212	-0.15532				R2	EC:2.7.9.1	0.011023	0.090815	0.170044				R4	EC:2.7.8.20	0.555142	0.998145	-0.290577
BL	EC:3.1.3.18	0.849491	0.996109	-0.165623				R2	EC:2.7.9.2	0.73079	0.823312	0.25097				R4	EC:2.7.8.24	0.92752	0.998145	-0.987516
BL	EC:3.1.3.2	0.85245	0.996109	-0.111111				R2	EC:2.7.9.3	0.721729	0.817484	0.196818				R4	EC:2.7.8.26	0.895799	0.998145	-0.201845
BL	EC:3.1.3.23	0.608448	0.996109	1.4				R2	EC:2.8.1.1	0.139417	0.287374	-0.328767				R4	EC:2.7.8.28	1	NA	-1
BL	EC:3.1.3.25	0.0924363	0.996109	-0.249525				R2	EC:2.8.1.10	0.0104096	0.0883741	-0.13016				R4	EC:2.7.8.31	1	NA	-1
BL	EC:3.1.3.26	0.994727	0.997622	0				R2	EC:2.8.1.12	0.450597	0.620089	0.329349				R4	EC:2.7.8.33	0.677734	0.998145	-0.140066
BL	EC:3.1.3.27	0.248105	0.996109	-0.513026				R2	EC:2.8.1.2	0.152547	0.302976	-0.302381				R4	EC:2.7.8.37	0.822795	0.998145	-0.998858
BL	EC:3.1.3.3	0.74301	0.996109	-0.197333				R2	EC:2.8.1.6	0.0845825	0.221879	0.187892				R4	EC:2.7.8.41	0.628874	0.998145	-0.210813
BL	EC:3.1.3.4	0.579702	0.996109	Inf				R2	EC:2.8.1.7	0.0929905	0.224957	0.214851				R4	EC:2.7.8.5	0.906225	0.998145	-0.152245
BL	EC:3.1.3.41	0.823642	0.996109	-0.00980392				R2	EC:2.8.1.8	0.473793	0.620089	0.206683				R4	EC:2.7.8.6	0.142644	0.903833	0.458333
BL	EC:3.1.3.45	0.886371	0.996109	-0.177912				R2	EC:2.8.2.22	0.615012	NA	-1				R4	EC:2.7.8.7	0.110021	0.903833	-0.252517
BL	EC:3.1.3.48	0.949344	0.996109	-0.150397				R2	EC:2.8.3.1	0.298117	0.45778	-0.0534847				R4	EC:2.7.8.8	0.83576	0.998145	-0.164568
BL	EC:3.1.3.5	0.703666	0.996109	-0.111081				R2	EC:2.8.3.10	0.131521	0.277602	-0.319725				R4	EC:2.7.9.1	0.181066	0.903833	-0.108796
BL	EC:3.1.3.6	0.945722	0.996109	-0.115665				R2	EC:2.8.3.12	0.121913	0.261178	0.4875				R4	EC:2.7.9.2	0.476213	0.998145	-0.303744
BL	EC:3.1.3.7	0.776169	0.996109	-0.151219				R2	EC:2.8.3.16	0.00022304	0.0170105	-0.872691				R4	EC:2.7.9.3	0.0672315	0.903833	-0.337897
BL	EC:3.1.3.70	0.38687	0.996109	Inf				R2	EC:2.8.3.18	1	NA	-1				R4	EC:2.8.1.1	0.621044	0.998145	-0.963781
BL	EC:3.1.3.71	0.981533	0.996944	-0.362637				R2	EC:2.8.3.19	0.141454	0.288971	-0.437024				R4	EC:2.8.1.10	0.689349	0.998145	-0.223316
BL	EC:3.1.3.73	0.805233	0.996109	-0.188472				R2	EC:2.8.3.21	0.287643	0.444097	-0.458333				R4	EC:2.8.1.12	0.513161	0.998145	-0.288186
BL	EC:3.1.3.8	0.934316	0.996109	0				R2	EC:2.8.3.22	1	NA	-1				R4	EC:2.8.1.2	0.621113	0.998145	-0.948104
BL	EC:3.1.3.81	0.579702	0.996109	Inf				R2	EC:2.8.3.5	0.679109	NA	-0.886179				R4	EC:2.8.1.6	0.0156015	0.903833	-0.116731
BL	EC:3.1.3.82	0.614456	0.996109	-0.238514				R2	EC:2.8.3.6	0.578036	NA	-1				R4	EC:2.8.1.7	0.644004	0.998145	-0.13677
BL	EC:3.1.3.83	0.614456	0.996109	-0.238514				R2	EC:2.8.3.8	0.212829	0.365984	0.662172				R4	EC:2.8.1.8	0.792671	0.998145	-0.149012
BL	EC:3.1.3.89	0.287524	0.996109	-0.0650953				R2	EC:2.8.3.9	0.212082	0.365394	0.663368				R4	EC:2.8.2.22	0.838476	0.998145	-1
BL	EC:3.1.3.90	0.361978	0.996109	-0.439001				R2	EC:2.8.4.2	1	NA	-1				R4	EC:2.8.3.1	0.137923	0.903833	-0.355473
BL	EC:3.1.31.1	0.936661	0.996109	-0.147541				R2	EC:2.8.4.3	0.895932	0.929235	0.123396				R4	EC:2.8.3.10	0.10782	0.903833	-0.471194
BL	EC:3.1.4.14	0.579702	0.996109	Inf				R2	EC:2.8.4.4	0.00121032	0.0419576	0.191817				R4	EC:2.8.3.12	0.671118	0.998145	-0.151111
BL	EC:3.1.4.16	0.945722	0.996109	-0.115665				R2	EC:2.8.4.5	0.0926274	0.224957	0.165897				R4	EC:2.8.3.16	0.485649	0.998145	0.299306
BL	EC:3.1.4.3	0.542592	0.996109	12.6667				R2	EC:2.9.1.1	0.298623	0.457794	-0.0588283				R4	EC:2.8.3.18	0.92752	0.998145	-0.99482
BL	EC:3.1.4.46	0.586336	0.996109	-0.19892				R2	EC:3.1.1.1	0.335169	0.502533	-0.685185				R4	EC:2.8.3.19	0.166133	0.903833	0.443779
BL	EC:3.1.4.52	0.750396	0.996109	Inf				R2	EC:3.1.1.11	0.575931	0.694698	-0.156863				R4	EC:2.8.3.20	0.765069	0.998145	-1
BL	EC:3.1.4.55	0.579826	0.996109	-0.107701				R2	EC:3.1.1.17	0.945813	NA	-0.888889				R4	EC:2.8.3.21	0.91022	0.998145	-0.992067
BL	EC:3.1.5.1	0.345882	0.996109	-0.182242				R2	EC:3.1.1.24	1	NA	-1				R4	EC:2.8.3.22	0.92752	0.998145	-0.986367
BL	EC:3.1.6.1	0.837577	0.996109	-0.5				R2	EC:3.1.1.29	0.463653	0.620089	0.13783				R4	EC:2.8.3.5	0.678196	0.998145	-0.976667
BL	EC:3.1.6.14	1	NA	Inf				R2	EC:3.1.1.3	0.0717346	0.210083	-0.390257				R4	EC:2.8.3.6	0.697093	0.998145	-0.989664
BL	EC:3.1.6.6	0.751462	0.996109	0.5				R2	EC:3.1.1.31	0.0234475	0.130213	-0.0569156				R4	EC:2.8.3.8	0.823585	0.998145	-0.53197
BL	EC:3.1.7.2	0.886455	0.996109	-0.2				R2	EC:3.1.1.32	0.0536029	0.181857	-0.473353				R4	EC:2.8.3.9	0.240574	0.964128	-0.457098
BL	EC:3.10.1.1	0.662859	0.996109	Inf				R2	EC:3.1.1.4	0.0536029	0.181857	-0.473353				R4	EC:2.8.4.3	0.804102	0.998145	-0.153829
BL	EC:3.11.1.1	0.611223	0.996109	-0.023723				R2	EC:3.1.1.41	0.111636	NA	-0.692308				R4	EC:2.8.4.4	0.0321777	0.903833	-0.11341
BL	EC:3.2.1.1	0.90997	0.996109	-0.175775				R2	EC:3.1.1.45	0.317324	0.48082	-0.907692				R4	EC:2.8.4.5	0.255923	0.981987	-0.11789
BL	EC:3.2.1.10	0.371569	0.996109	-0.256473				R2	EC:3.1.1.5	0.36206	0.531021	0.125991				R4	EC:2.9.1.1	0.00786104	0.903833	-0.479823
BL	EC:3.2.1.11	0.697284	0.996109	-1				R2	EC:3.1.1.53	0.035692	0.158262	-0.466558				R4	EC:3.1.1.1	0.591097	0.998145	-0.785247
BL	EC:3.2.1.122	0.921143	0.996109	0.0324846				R2	EC:3.1.1.57	0.864314	NA	-0.333333				R4	EC:3.1.1.11	0.291176	0.998145	-0.986627
BL	EC:3.2.1.135	0.448463	0.996109	-0.375				R2	EC:3.1.1.61	0.00137711	0.0425788	0.620878				R4	EC:3.1.1.17	0.591895	0.998145	-0.923896
BL	EC:3.2.1.136	0.299709	0.996109	-0.653333				R2	EC:3.1.1.73	0.696102	NA	-0.666667				R4	EC:3.1.1.22	0.984308	0.998145	-1
BL	EC:3.2.1.139	0.31024	0.996109	1.39623				R2	EC:3.1.1.75	0.6176	NA	-0.75				R4	EC:3.1.1.24	0.990628	0.998145	-0.992026
BL	EC:3.2.1.14	0.841272	0.996109	Inf				R2	EC:3.1.1.85	0.053804	0.181857	-0.472536				R4	EC:3.1.1.29	0.140069	0.903833	-0.124826
BL	EC:3.2.1.141	0.934316	0.996109	0				R2	EC:3.1.11.1	0.615012	NA	-1				R4	EC:3.1.1.3	0.149079	0.903833	-0.494094
BL	EC:3.2.1.156	0.841272	0.996109	Inf				R2	EC:3.1.11.2	0.340957	0.508546	0.0890961				R4	EC:3.1.1.31	0.841159	0.998145	-0.172159
BL	EC:3.2.1.17	0.327759	0.996109	Inf				R2	EC:3.1.11.3	0.615012	NA	-1				R4	EC:3.1.1.32	0.872582	0.998145	-0.166963
BL	EC:3.2.1.170	0.833021	0.996109	0.125828				R2	EC:3.1.11.5	0.807784	0.87676	0.124597				R4	EC:3.1.1.4	0.872582	0.998145	-0.166963
BL	EC:3.2.1.172	0.387651	0.996109	-0.385836				R2	EC:3.1.11.6	0.477669	0.620089	0.137404				R4	EC:3.1.1.41	0.564254	0.998145	-0.850427
BL	EC:3.2.1.177	0.474154	0.996109	-0.288363				R2	EC:3.1.12.1	0.054636	0.182226	0.441485				R4	EC:3.1.1.45	0.45366	0.998145	-0.995093
BL	EC:3.2.1.18	0.603532	0.996109	-0.0221405				R2	EC:3.1.13.1	0.454679	NA	-1				R4	EC:3.1.1.5	0.253998	0.981987	-0.733077
BL	EC:3.2.1.180	0.316929	0.996109	-0.357452				R2	EC:3.1.13.3	0.400641	0.572916	0.141287				R4	EC:3.1.1.53	0.871051	0.998145	-0.168126
BL	EC:3.2.1.184	0.518948	0.996109	-0.377622				R2	EC:3.1.13.5	0.60679	0.723092	0.0413437				R4	EC:3.1.1.57	0.755139	0.998145	-0.983539
BL	EC:3.2.1.20	0.639693	0.996109	-0.17886				R2	EC:3.1.2.1	0.518992	NA	-1				R4	EC:3.1.1.61	0.263495	0.985868	-0.0476031
BL	EC:3.2.1.21	0.704125	0.996109	-0.1189				R2	EC:3.1.2.12	0.26983	0.435382	-0.939394				R4	EC:3.1.1.73	0.755139	0.998145	-0.960317
BL	EC:3.2.1.22	0.958805	0.996944	-0.150885				R2	EC:3.1.2.20	0.845278	NA	Inf				R4	EC:3.1.1.75	0.417363	0.998145	-0.953146
BL	EC:3.2.1.23	0.634903	0.996109	-0.173237				R2	EC:3.1.2.21	0.00918514	0.0827055	-0.927523				R4	EC:3.1.1.85	0.942918	0.998145	-0.253001
BL	EC:3.2.1.24	0.515373	0.996109	-0.275477				R2	EC:3.1.2.23	1	NA	-1				R4	EC:3.1.11.1	0.92752	0.998145	-0.999124
BL	EC:3.2.1.25	0.812887	0.996109	-0.20141				R2	EC:3.1.2.28	0.195396	0.351467	-0.47619				R4	EC:3.1.11.2	0.729854	0.998145	-0.153477
BL	EC:3.2.1.26	0.272086	0.996109	-0.258734				R2	EC:3.1.2.6	0.714217	0.812188	0.2635				R4	EC:3.1.11.3	1	NA	-1
BL	EC:3.2.1.28	0.359494	0.996109	Inf				R2	EC:3.1.21.1	0.615012	NA	-1				R4	EC:3.1.11.5	0.305627	0.998145	-0.17521
BL	EC:3.2.1.31	0.602271	0.996109	-0.0180117				R2	EC:3.1.21.2	0.519096	0.653615	0.150909				R4	EC:3.1.11.6	0.140022	0.903833	-0.125098
BL	EC:3.2.1.35	0.61363	0.996109	-0.0234745				R2	EC:3.1.21.3	0.59076	0.708417	0.0469909				R4	EC:3.1.12.1	0.579496	0.998145	-0.133066
BL	EC:3.2.1.37	0.854237	0.996109	-0.0294118				R2	EC:3.1.21.4	0.540648	0.663628	-0.264706				R4	EC:3.1.13.1	0.765069	0.998145	-1
BL	EC:3.2.1.4	0.0754468	0.996109	0.0793139				R2	EC:3.1.21.5	0.00442189	0.0743918	1.24818				R4	EC:3.1.13.3	0.161754	0.903833	-0.105769
BL	EC:3.2.1.40	0.591715	0.996109	-0.364706				R2	EC:3.1.21.7	0.559437	0.682299	0.485714				R4	EC:3.1.13.5	0.586534	0.998145	-0.25198
BL	EC:3.2.1.41	0.568513	0.996109	-0.0194141				R2	EC:3.1.22.4	0.354453	0.523895	0.0530332				R4	EC:3.1.2.12	0.591895	0.998145	-0.995655
BL	EC:3.2.1.45	0.600514	0.996109	-0.0176242				R2	EC:3.1.26.11	0.77334	0.853134	0.140078				R4	EC:3.1.2.20	0.565858	0.998145	Inf
BL	EC:3.2.1.50	0.611377	0.996109	-0.0235557				R2	EC:3.1.26.12	0.0071299	0.0779922	-0.977707				R4	EC:3.1.2.21	0.439618	0.998145	0.536286
BL	EC:3.2.1.51	0.804345	0.996109	-0.124683				R2	EC:3.1.26.3	0.477507	0.620089	0.137515				R4	EC:3.1.2.23	0.92752	0.998145	-0.990544
BL	EC:3.2.1.52	0.566355	0.996109	-0.128812				R2	EC:3.1.26.4	0.552138	0.675557	0.136153				R4	EC:3.1.2.28	0.397733	0.998145	-0.976624
BL	EC:3.2.1.55	0.875279	0.996109	-0.169349				R2	EC:3.1.26.5	0.232861	0.390034	0.144348				R4	EC:3.1.2.6	0.55393	0.998145	-0.279295
BL	EC:3.2.1.65	0.971732	0.996944	-1				R2	EC:3.1.26.8	0.828613	0.890078	0.245655				R4	EC:3.1.21.1	0.92752	0.998145	-0.999117
BL	EC:3.2.1.70	0.551588	0.996109	-0.44974				R2	EC:3.1.27.1	0.945813	NA	-0.916667				R4	EC:3.1.21.2	0.690577	0.998145	-0.138805
BL	EC:3.2.1.78	0.99712	0.998212	-0.132234				R2	EC:3.1.27.3	0.546032	NA	-1				R4	EC:3.1.21.3	0.0704977	0.903833	-0.0505069
BL	EC:3.2.1.8	0.621997	0.996109	-0.293654				R2	EC:3.1.27.6	0.615012	NA	-1				R4	EC:3.1.21.4	0.523085	0.998145	-0.45849
BL	EC:3.2.1.80	0.439572	0.996109	-0.777778				R2	EC:3.1.3.1	0.140628	0.288596	-0.135928				R4	EC:3.1.21.5	0.0572467	0.903833	0.0840185
BL	EC:3.2.1.85	0.381975	0.996109	-0.379052				R2	EC:3.1.3.10	0.560311	NA	-1				R4	EC:3.1.21.7	0.231621	0.953217	-0.943759
BL	EC:3.2.1.86	0.424133	0.996109	-0.259201				R2	EC:3.1.3.11	0.0379345	0.162536	-0.00615463				R4	EC:3.1.22.4	0.994171	0.998145	-0.160867
BL	EC:3.2.1.89	0.84177	0.996109	-0.198229				R2	EC:3.1.3.12	0.0466936	0.178058	-0.470483				R4	EC:3.1.26.11	0.883601	0.998145	-0.15756
BL	EC:3.2.1.93	0.346533	0.996109	-0.426874				R2	EC:3.1.3.15	0.0833601	0.221879	0.0455757				R4	EC:3.1.26.12	0.120756	0.903833	-0.993536
BL	EC:3.2.1.96	0.556379	0.996109	0.5				R2	EC:3.1.3.16	0.120294	0.259345	0.31612				R4	EC:3.1.26.3	0.148356	0.903833	-0.125108
BL	EC:3.2.1.99	0.509407	0.996109	-0.429303				R2	EC:3.1.3.18	0.0560948	0.185469	0.208544				R4	EC:3.1.26.4	0.138328	0.903833	-0.125508
BL	EC:3.2.2.1	0.102034	0.996109	-0.378696				R2	EC:3.1.3.2	0.37218	0.541697	-0.811321				R4	EC:3.1.26.5	0.108059	0.903833	-0.121061
BL	EC:3.2.2.16	0.662859	0.996109	Inf				R2	EC:3.1.3.23	0.938388	NA	-0.966667				R4	EC:3.1.26.8	0.839221	0.998145	-0.119482
BL	EC:3.2.2.20	0.383491	0.996109	-0.222436				R2	EC:3.1.3.25	0.0990142	0.232422	-0.0788314				R4	EC:3.1.27.1	0.591895	0.998145	-0.537037
BL	EC:3.2.2.21	0.823114	0.996109	-0.158282				R2	EC:3.1.3.26	0.615012	NA	-1				R4	EC:3.1.27.3	1	NA	-1
BL	EC:3.2.2.23	0.364668	0.996109	0.163233				R2	EC:3.1.3.27	0.707385	0.805223	0.270822				R4	EC:3.1.27.6	1	NA	-1
BL	EC:3.2.2.26	0.908415	0.996109	-0.19527				R2	EC:3.1.3.3	0.790292	0.866821	0.0351926				R4	EC:3.1.3.1	0.966311	0.998145	-0.156134
BL	EC:3.2.2.27	0.775641	0.996109	-0.166245				R2	EC:3.1.3.37	0.696102	NA	-0.666667				R4	EC:3.1.3.10	0.986069	0.998145	-1
BL	EC:3.2.2.4	0.61011	0.996109	-0.0231756				R2	EC:3.1.3.4	0.428424	NA	-1				R4	EC:3.1.3.11	0.391015	0.998145	-0.215921
BL	EC:3.2.2.8	0.579702	0.996109	Inf				R2	EC:3.1.3.41	1.06116e-08	2.42793e-06	-0.916203				R4	EC:3.1.3.12	0.814045	0.998145	-0.136804
BL	EC:3.2.2.9	0.784347	0.996109	-0.169557				R2	EC:3.1.3.45	0.20213	0.355867	-0.097491				R4	EC:3.1.3.15	0.649809	0.998145	-0.138211
BL	EC:3.3.1.1	0.649846	0.996109	-0.199397				R2	EC:3.1.3.48	0.0991054	0.232422	0.0660198				R4	EC:3.1.3.16	0.771215	0.998145	-0.149247
BL	EC:3.3.2.1	0.579702	0.996109	Inf				R2	EC:3.1.3.5	0.0697629	0.20681	-0.17296				R4	EC:3.1.3.18	0.25106	0.981987	-0.113155
BL	EC:3.4.11.1	0.260488	0.996109	-0.445882				R2	EC:3.1.3.6	1.16211e-09	3.32364e-07	-0.966156				R4	EC:3.1.3.2	0.986329	0.998145	-0.997282
BL	EC:3.4.11.14	0.449261	0.996109	-0.376263				R2	EC:3.1.3.7	0.401433	0.573332	0.152867				R4	EC:3.1.3.23	0.990628	0.998145	-0.999488
BL	EC:3.4.11.18	0.833282	0.996109	-0.161303				R2	EC:3.1.3.70	0.615012	NA	-1				R4	EC:3.1.3.25	0.317119	0.998145	-0.193505
BL	EC:3.4.11.19	0.372786	0.996109	1.37736				R2	EC:3.1.3.71	0.598879	0.715902	0.325				R4	EC:3.1.3.26	0.862073	0.998145	-0.998022
BL	EC:3.4.11.2	0.213359	0.996109	-0.287794				R2	EC:3.1.3.73	0.116201	0.255081	0.30796				R4	EC:3.1.3.27	0.701516	0.998145	-0.562218
BL	EC:3.4.11.21	0.503641	0.996109	-0.213304				R2	EC:3.1.3.77	0.845278	NA	Inf				R4	EC:3.1.3.3	0.241138	0.964128	-0.0931619
BL	EC:3.4.11.23	0.872121	0.996109	0.333333				R2	EC:3.1.3.8	0.413727	0.587955	-0.545455				R4	EC:3.1.3.37	0.578957	0.998145	0.777778
BL	EC:3.4.11.4	0.883035	0.996109	-0.16356				R2	EC:3.1.3.81	0.428424	NA	-1				R4	EC:3.1.3.4	1	NA	-1
BL	EC:3.4.11.5	0.296544	0.996109	-0.357404				R2	EC:3.1.3.82	0.329689	0.496269	0.394343				R4	EC:3.1.3.41	0.562056	0.998145	-0.292697
BL	EC:3.4.11.7	0.661685	0.996109	-0.545455				R2	EC:3.1.3.83	0.329689	0.496269	0.394343				R4	EC:3.1.3.45	0.936386	0.998145	-0.127766
BL	EC:3.4.11.9	0.990095	0.997622	-0.158555				R2	EC:3.1.3.89	0.00522537	0.0749877	0.682382				R4	EC:3.1.3.48	0.287534	0.998145	-0.123867
BL	EC:3.4.13.19	0.78844	0.996109	-0.125561				R2	EC:3.1.3.90	0.0644485	0.201087	-0.43089				R4	EC:3.1.3.5	0.837417	0.998145	-0.184527
BL	EC:3.4.13.21	0.843559	0.996109	-0.201975				R2	EC:3.1.31.1	0.953142	0.966662	0.46438				R4	EC:3.1.3.6	0.171932	0.903833	-0.715319
BL	EC:3.4.13.22	0.872321	0.996109	-0.14832				R2	EC:3.1.4.14	0.615012	NA	-1				R4	EC:3.1.3.7	0.618522	0.998145	-0.122595
BL	EC:3.4.13.9	0.0512631	0.996109	-0.366904				R2	EC:3.1.4.16	1.16211e-09	3.32364e-07	-0.966156				R4	EC:3.1.3.70	1	NA	-1
BL	EC:3.4.14.11	0.420617	0.996109	-0.378141				R2	EC:3.1.4.17	0.708194	NA	-1				R4	EC:3.1.3.71	0.588068	0.998145	-0.0149724
BL	EC:3.4.14.4	0.642803	0.996109	-0.114009				R2	EC:3.1.4.3	0.48027	NA	-0.958333				R4	EC:3.1.3.73	0.970919	0.998145	-0.192421
BL	EC:3.4.14.5	0.633701	0.996109	-0.112699				R2	EC:3.1.4.46	0.000596887	0.0310363	-0.215861				R4	EC:3.1.3.77	1	NA	-1
BL	EC:3.4.15.1	0.662859	0.996109	Inf				R2	EC:3.1.4.52	1	NA	-1				R4	EC:3.1.3.8	0.458822	0.998145	-0.951389
BL	EC:3.4.15.5	0.639981	0.996109	-0.113865				R2	EC:3.1.4.55	0.210423	0.363232	-0.119261				R4	EC:3.1.3.81	1	NA	-1
BL	EC:3.4.15.6	0.238968	0.996109	-0.909091				R2	EC:3.1.5.1	0.84465	0.898591	0.120302				R4	EC:3.1.3.82	0.383327	0.998145	-0.338876
BL	EC:3.4.16.4	0.763326	0.996109	-0.135266				R2	EC:3.1.6.1	0.938029	0.959575	-0.738462				R4	EC:3.1.3.83	0.383327	0.998145	-0.338876
BL	EC:3.4.17.11	0.352104	0.996109	-0.401735				R2	EC:3.1.6.12	0.96765	NA	0				R4	EC:3.1.3.87	1	NA	-1
BL	EC:3.4.17.13	0.610169	0.996109	-0.0346469				R2	EC:3.1.6.6	0.577067	NA	-0.461538				R4	EC:3.1.3.89	0.509002	0.998145	-0.113727
BL	EC:3.4.17.19	0.672781	0.996109	-0.220336				R2	EC:3.1.6.8	0.96765	NA	0				R4	EC:3.1.3.90	0.160292	0.903833	-0.510576
BL	EC:3.4.19.1	0.89109	0.996109	0.346154				R2	EC:3.1.7.2	0.74314	NA	-0.909091				R4	EC:3.1.30.1	1	NA	-1
BL	EC:3.4.19.11	0.307296	0.996109	-0.348439				R2	EC:3.11.1.1	0.0539069	0.181857	-0.472409				R4	EC:3.1.31.1	0.21682	0.953217	0.488519
BL	EC:3.4.19.13	0.318275	0.996109	0.0385588				R2	EC:3.2.1.1	0.15963	0.311633	-0.101793				R4	EC:3.1.4.14	1	NA	-1
BL	EC:3.4.19.3	0.459277	0.996109	0.111456				R2	EC:3.2.1.10	0.167783	0.324106	0.282283				R4	EC:3.1.4.16	0.171932	0.903833	-0.715319
BL	EC:3.4.19.5	0.579702	0.996109	Inf				R2	EC:3.2.1.11	0.577067	NA	Inf				R4	EC:3.1.4.17	0.599896	0.998145	-1
BL	EC:3.4.21.102	0.661958	0.996109	-0.134971				R2	EC:3.2.1.122	0.000766798	0.0338078	-0.835563				R4	EC:3.1.4.3	0.412371	0.998145	-1
BL	EC:3.4.21.105	0.166077	0.996109	-0.284328				R2	EC:3.2.1.123	0.518992	NA	-1				R4	EC:3.1.4.46	0.223853	0.953217	-0.247993
BL	EC:3.4.21.107	0.485156	0.996109	-0.200422				R2	EC:3.2.1.132	0.614741	NA	-1				R4	EC:3.1.4.52	1	NA	-1
BL	EC:3.4.21.116	0.678611	0.996109	-0.116461				R2	EC:3.2.1.135	0.0147131	0.0994933	-0.934821				R4	EC:3.1.4.55	0.770097	0.998145	-0.0931934
BL	EC:3.4.21.26	0.911028	0.996109	-0.19495				R2	EC:3.2.1.136	0.725267	0.819867	-0.107692				R4	EC:3.1.5.1	0.826671	0.998145	-0.163884
BL	EC:3.4.21.53	0.293526	0.996109	-0.169083				R2	EC:3.2.1.139	0.952869	NA	-0.731707				R4	EC:3.1.6.1	0.822251	0.998145	-0.995998
BL	EC:3.4.21.66	0.607749	0.996109	-0.636364				R2	EC:3.2.1.14	0.497153	NA	-0.333333				R4	EC:3.1.6.12	0.896154	0.998145	-0.972222
BL	EC:3.4.21.72	0.841272	0.996109	Inf				R2	EC:3.2.1.141	1	NA	-1				R4	EC:3.1.6.6	0.713062	0.998145	-0.993131
BL	EC:3.4.21.83	0.581109	0.996109	0.479167				R2	EC:3.2.1.156	0.288223	NA	-0.666667				R4	EC:3.1.6.8	0.896154	0.998145	-0.991182
BL	EC:3.4.21.88	0.698716	0.996109	-0.127874				R2	EC:3.2.1.17	0.867006	NA	-0.769231				R4	EC:3.1.7.2	0.642708	0.998145	-0.999101
BL	EC:3.4.21.89	0.995031	0.997622	-0.157171				R2	EC:3.2.1.170	0.866684	0.911293	0.520833				R4	EC:3.11.1.1	0.67435	0.998145	-0.055531
BL	EC:3.4.21.92	0.62889	0.996109	-0.176486				R2	EC:3.2.1.172	0.0842757	0.221879	-0.403858				R4	EC:3.2.1.1	0.841999	0.998145	-0.175671
BL	EC:3.4.21.96	0.291338	0.996109	2.2				R2	EC:3.2.1.177	0.471093	0.620089	0.197303				R4	EC:3.2.1.10	0.878154	0.998145	-0.153437
BL	EC:3.4.22.40	0.776819	0.996109	-0.129039				R2	EC:3.2.1.18	0.0532135	0.181857	-0.465896				R4	EC:3.2.1.11	0.601011	0.998145	-0.988545
BL	EC:3.4.22.70	0.804805	0.996109	-0.186509				R2	EC:3.2.1.180	0.124872	0.266021	-0.244421				R4	EC:3.2.1.122	0.848597	0.998145	-0.00417862
BL	EC:3.4.23.1	0.662859	0.996109	Inf				R2	EC:3.2.1.184	0.902107	0.931417	0.157143				R4	EC:3.2.1.135	0.490919	0.998145	0.567427
BL	EC:3.4.23.36	0.573599	0.996109	-0.169505				R2	EC:3.2.1.20	0.0625565	0.19897	0.0220242				R4	EC:3.2.1.136	0.576871	0.998145	0.507024
BL	EC:3.4.23.4	0.662859	0.996109	Inf				R2	EC:3.2.1.21	0.175298	0.334235	-0.00655121				R4	EC:3.2.1.139	0.363807	0.998145	-0.995483
BL	EC:3.4.23.43	0.0789158	0.996109	-0.249621				R2	EC:3.2.1.22	0.0260422	0.134199	-0.0464848				R4	EC:3.2.1.14	0.879766	0.998145	-0.989493
BL	EC:3.4.23.48	0.750396	0.996109	Inf				R2	EC:3.2.1.23	0.121604	0.261178	0.0540834				R4	EC:3.2.1.141	0.92752	0.998145	-0.993912
BL	EC:3.4.23.49	0.750396	0.996109	Inf				R2	EC:3.2.1.24	0.878284	0.916784	-0.00668088				R4	EC:3.2.1.156	0.324214	0.998145	-0.857143
BL	EC:3.4.23.51	0.258259	0.996109	0.282051				R2	EC:3.2.1.25	0.293074	0.450641	0.241129				R4	EC:3.2.1.165	0.640687	0.998145	-1
BL	EC:3.4.24.3	0.841272	0.996109	Inf				R2	EC:3.2.1.26	0.183102	0.344035	0.291644				R4	EC:3.2.1.17	0.565858	0.998145	-0.999311
BL	EC:3.4.24.40	0.878172	0.996109	-1				R2	EC:3.2.1.28	0.870565	NA	-0.9				R4	EC:3.2.1.170	0.483407	0.998145	0.453122
BL	EC:3.4.24.55	0.579702	0.996109	Inf				R2	EC:3.2.1.31	0.0531719	0.181857	-0.473944				R4	EC:3.2.1.172	0.104392	0.903833	-0.533022
BL	EC:3.4.24.70	0.825819	0.996109	0.4				R2	EC:3.2.1.35	0.0544581	0.182164	-0.451489				R4	EC:3.2.1.177	0.888585	0.998145	-0.195438
BL	EC:3.4.24.78	0.692468	0.996109	-0.117233				R2	EC:3.2.1.37	0.838409	0.895212	0.621622				R4	EC:3.2.1.18	0.675217	0.998145	-0.0675621
BL	EC:3.4.25.2	0.58135	0.996109	-0.295924				R2	EC:3.2.1.4	0.0658656	0.202554	0.480127				R4	EC:3.2.1.180	0.293155	0.998145	-0.346692
BL	EC:3.5.1.1	0.30416	0.996109	-0.117279				R2	EC:3.2.1.40	0.415257	0.588666	-0.571197				R4	EC:3.2.1.184	0.587695	0.998145	-0.358438
BL	EC:3.5.1.10	0.99029	0.997622	-0.148618				R2	EC:3.2.1.41	0.0123658	0.0982395	-0.425569				R4	EC:3.2.1.185	0.763369	0.998145	Inf
BL	EC:3.5.1.101	0.697284	0.996109	-1				R2	EC:3.2.1.45	0.0505572	0.181857	-0.47103				R4	EC:3.2.1.20	0.153814	0.903833	-0.125256
BL	EC:3.5.1.103	0.750396	0.996109	Inf				R2	EC:3.2.1.50	0.0540835	0.181857	-0.472034				R4	EC:3.2.1.21	0.279065	0.998145	-0.0887832
BL	EC:3.5.1.105	0.621557	0.996109	-0.652174				R2	EC:3.2.1.51	0.0330719	0.151524	-0.202348				R4	EC:3.2.1.22	0.367109	0.998145	-0.119617
BL	EC:3.5.1.106	0.934316	0.996109	0				R2	EC:3.2.1.52	0.180791	0.342426	0.0145031				R4	EC:3.2.1.23	0.161395	0.903833	-0.123699
BL	EC:3.5.1.107	0.934316	0.996109	0				R2	EC:3.2.1.55	0.0022665	0.0581741	-0.305241				R4	EC:3.2.1.24	0.72414	0.998145	-0.215888
BL	EC:3.5.1.108	0.923561	0.996109	-0.1725				R2	EC:3.2.1.64	0.874137	NA	-1				R4	EC:3.2.1.25	0.737239	0.998145	-0.0840691
BL	EC:3.5.1.11	0.8416	0.996109	0.5				R2	EC:3.2.1.70	2.39819e-05	0.00342941	-0.941322				R4	EC:3.2.1.26	0.927408	0.998145	-0.161641
BL	EC:3.5.1.110	0.502019	0.996109	Inf				R2	EC:3.2.1.78	0.00462619	0.0749877	-0.386883				R4	EC:3.2.1.28	1	NA	-1
BL	EC:3.5.1.115	0.750396	0.996109	Inf				R2	EC:3.2.1.8	0.0368623	0.160956	0.635908				R4	EC:3.2.1.31	0.889169	0.998145	-0.171641
BL	EC:3.5.1.118	0.441716	0.996109	3.5				R2	EC:3.2.1.80	0.625732	NA	4				R4	EC:3.2.1.35	0.620307	0.998145	-0.0431728
BL	EC:3.5.1.15	0.662859	0.996109	Inf				R2	EC:3.2.1.85	0.0178596	0.108103	-0.928381				R4	EC:3.2.1.37	0.197689	0.941367	-0.525848
BL	EC:3.5.1.16	0.97115	0.996944	-0.154746				R2	EC:3.2.1.86	0.0171778	0.107742	-0.157728				R4	EC:3.2.1.4	0.0901569	0.903833	-0.0222105
BL	EC:3.5.1.18	0.278899	0.996109	-0.260478				R2	EC:3.2.1.89	0.00589487	0.0779922	0.813761				R4	EC:3.2.1.40	0.0927759	0.903833	-0.848509
BL	EC:3.5.1.19	0.392792	0.996109	2				R2	EC:3.2.1.93	0.0631172	0.199208	-0.434148				R4	EC:3.2.1.41	0.766402	0.998145	-0.220513
BL	EC:3.5.1.2	0.655943	0.996109	-0.117671				R2	EC:3.2.1.96	0.0484731	0.17946	-0.62069				R4	EC:3.2.1.45	0.718224	0.998145	-0.0782
BL	EC:3.5.1.24	0.712961	0.996109	-0.128136				R2	EC:3.2.1.97	0.614741	NA	-1				R4	EC:3.2.1.50	0.743084	0.998145	-0.0964658
BL	EC:3.5.1.25	0.808443	0.996109	-0.166189				R2	EC:3.2.1.99	0.900982	0.931417	0.348884				R4	EC:3.2.1.51	0.912198	0.998145	-0.147289
BL	EC:3.5.1.26	0.403822	0.996109	-0.390202				R2	EC:3.2.2.1	0.0253165	0.134199	-0.286434				R4	EC:3.2.1.52	0.609876	0.998145	-0.11875
BL	EC:3.5.1.28	0.261408	0.996109	-0.101404				R2	EC:3.2.2.20	0.877012	0.916784	0.156146				R4	EC:3.2.1.55	0.630706	0.998145	-0.225039
BL	EC:3.5.1.32	0.970585	0.996944	-0.172464				R2	EC:3.2.2.21	0.00321636	0.0665129	-0.182198				R4	EC:3.2.1.65	0.727753	0.998145	-0.972452
BL	EC:3.5.1.38	0.878172	0.996109	-1				R2	EC:3.2.2.23	0.0258305	0.134199	-0.330845				R4	EC:3.2.1.70	0.95632	0.998145	-0.138654
BL	EC:3.5.1.4	0.35159	0.996109	-0.414918				R2	EC:3.2.2.24	0.78235	NA	-1				R4	EC:3.2.1.78	0.474241	0.998145	-0.0633809
BL	EC:3.5.1.42	0.295788	0.996109	-0.121743				R2	EC:3.2.2.26	0.525105	0.653615	0.210259				R4	EC:3.2.1.8	0.520146	0.998145	-0.0390601
BL	EC:3.5.1.44	0.929432	0.996109	-0.147754				R2	EC:3.2.2.27	0.0109249	0.090815	-0.0280806				R4	EC:3.2.1.80	0.951194	0.998145	-0.99005
BL	EC:3.5.1.46	0.8416	0.996109	0.5				R2	EC:3.2.2.4	0.0535606	0.181857	-0.473304				R4	EC:3.2.1.82	0.693715	0.998145	-1
BL	EC:3.5.1.47	0.703092	0.996109	7.6				R2	EC:3.2.2.8	0.615012	NA	-1				R4	EC:3.2.1.85	0.441282	0.998145	0.563853
BL	EC:3.5.1.49	0.878172	0.996109	-1				R2	EC:3.2.2.9	0.344646	0.513378	0.0720039				R4	EC:3.2.1.86	0.0500902	0.903833	-0.355839
BL	EC:3.5.1.5	0.361126	0.996109	-0.94				R2	EC:3.3.1.1	0.00955929	0.0847739	0.430809				R4	EC:3.2.1.89	0.175991	0.903833	0.0515679
BL	EC:3.5.1.53	0.660242	0.996109	-0.0425229				R2	EC:3.3.2.1	0.390201	NA	-1				R4	EC:3.2.1.91	0.896222	0.998145	-1
BL	EC:3.5.1.54	0.8416	0.996109	0.5				R2	EC:3.3.2.12	0.518992	NA	-1				R4	EC:3.2.1.93	0.0511235	0.903833	-0.620371
BL	EC:3.5.1.78	0.750396	0.996109	Inf				R2	EC:3.3.2.8	1	NA	-1				R4	EC:3.2.1.96	0.632672	0.998145	-0.426523
BL	EC:3.5.1.81	0.824698	0.996109	-0.211971				R2	EC:3.4.11.1	0.0932075	0.224957	-0.205681				R4	EC:3.2.1.97	0.763369	0.998145	-0.975845
BL	EC:3.5.1.86	0.750396	0.996109	Inf				R2	EC:3.4.11.10	0.808327	NA	-0.5				R4	EC:3.2.1.99	0.0835602	0.903833	-0.676909
BL	EC:3.5.1.87	0.369208	0.996109	-0.355168				R2	EC:3.4.11.14	0.03886	0.164651	-0.935542				R4	EC:3.2.2.1	0.130085	0.903833	-0.336501
BL	EC:3.5.1.88	0.0236356	0.996109	-0.115618				R2	EC:3.4.11.18	0.00350878	0.0678077	0.208324				R4	EC:3.2.2.20	0.476299	0.998145	-0.176461
BL	EC:3.5.1.9	0.767237	0.996109	-0.206039				R2	EC:3.4.11.19	0.287411	0.444097	-0.924528				R4	EC:3.2.2.21	0.0331706	0.903833	-0.350022
BL	EC:3.5.1.94	0.750396	0.996109	Inf				R2	EC:3.4.11.2	2.9764e-05	0.00363772	-0.941421				R4	EC:3.2.2.23	0.125035	0.903833	-0.406085
BL	EC:3.5.1.96	0.755983	0.996109	1				R2	EC:3.4.11.21	0.099954	0.232887	0.338814				R4	EC:3.2.2.24	0.984308	0.998145	-1
BL	EC:3.5.1.97	0.697284	0.996109	-1				R2	EC:3.4.11.23	0.560311	NA	-1				R4	EC:3.2.2.26	0.963311	0.998145	-0.0836091
BL	EC:3.5.2.10	0.35743	0.996109	-0.42355				R2	EC:3.4.11.4	0.100323	0.233272	0.0578105				R4	EC:3.2.2.27	0.548293	0.998145	-0.128954
BL	EC:3.5.2.17	0.611298	0.996109	2.5				R2	EC:3.4.11.5	0.432255	0.606004	-0.0377675				R4	EC:3.2.2.30	0.911304	0.998145	-1
BL	EC:3.5.2.2	0.390704	0.996109	-0.275476				R2	EC:3.4.11.6	0.808327	NA	-0.5				R4	EC:3.2.2.4	0.976461	0.998145	-0.216823
BL	EC:3.5.2.3	0.312645	0.996109	-0.147606				R2	EC:3.4.11.7	0.740469	0.825947	-0.190476				R4	EC:3.2.2.8	1	NA	-1
BL	EC:3.5.2.5	0.334019	0.996109	-0.422484				R2	EC:3.4.11.9	0.807573	0.87676	0.134953				R4	EC:3.2.2.9	0.721961	0.998145	-0.150142
BL	EC:3.5.2.6	0.983534	0.996944	-0.17071				R2	EC:3.4.13.19	0.247649	0.408229	0.275705				R4	EC:3.3.1.1	0.436286	0.998145	-0.0423538
BL	EC:3.5.2.7	0.983606	0.996944	-0.178814				R2	EC:3.4.13.21	0.57486	0.694446	0.18619				R4	EC:3.3.2.1	1	NA	-1
BL	EC:3.5.3.1	0.439659	0.996109	-0.959459				R2	EC:3.4.13.22	0.137296	0.283516	1.1194				R4	EC:3.3.2.12	1	NA	-1
BL	EC:3.5.3.11	0.333482	0.996109	-0.0264962				R2	EC:3.4.13.9	0.047216	0.17832	-0.186273				R4	EC:3.3.2.9	0.765069	0.998145	-1
BL	EC:3.5.3.12	0.276859	0.996109	-0.401954				R2	EC:3.4.14.11	0.0130651	0.0994933	-0.931696				R4	EC:3.4.11.1	0.0761717	0.903833	-0.430804
BL	EC:3.5.3.13	0.934316	0.996109	0				R2	EC:3.4.14.12	0.78235	NA	-1				R4	EC:3.4.11.14	0.529138	0.998145	0.575163
BL	EC:3.5.3.18	0.613211	0.996109	0.0555556				R2	EC:3.4.14.4	0.189969	0.347054	-0.130247				R4	EC:3.4.11.18	0.152067	0.903833	-0.119899
BL	EC:3.5.3.23	0.503422	0.996109	2.5				R2	EC:3.4.14.5	0.159302	0.311523	-0.141907				R4	EC:3.4.11.19	0.92752	0.998145	-0.990253
BL	EC:3.5.3.26	0.750396	0.996109	Inf				R2	EC:3.4.15.1	0.696102	NA	-0.666667				R4	EC:3.4.11.2	0.501496	0.998145	-0.545551
BL	EC:3.5.3.4	0.8416	0.996109	0.5				R2	EC:3.4.15.5	0.189311	0.347054	-0.130435				R4	EC:3.4.11.21	0.871125	0.998145	-0.175066
BL	EC:3.5.3.6	0.822242	0.996109	-0.217619				R2	EC:3.4.15.6	0.466248	0.620089	-0.956679				R4	EC:3.4.11.23	0.765069	0.998145	-1
BL	EC:3.5.3.7	0.878172	0.996109	-1				R2	EC:3.4.16.4	0.136054	0.28248	0.289134				R4	EC:3.4.11.4	0.32365	0.998145	-0.130997
BL	EC:3.5.3.8	0.755983	0.996109	1				R2	EC:3.4.17.11	0.0867022	0.221879	-0.37167				R4	EC:3.4.11.5	0.535082	0.998145	-0.281755
BL	EC:3.5.3.9	0.325723	0.996109	-0.414187				R2	EC:3.4.17.13	0.0454447	0.1766	-0.456099				R4	EC:3.4.11.7	0.340652	0.998145	0.535948
BL	EC:3.5.4.1	0.528613	0.996109	-0.391026				R2	EC:3.4.17.19	0.0502664	0.181857	-0.141091				R4	EC:3.4.11.9	0.919366	0.998145	-0.145858
BL	EC:3.5.4.10	0.125336	0.996109	-0.139501				R2	EC:3.4.19.1	0.135558	0.282474	0.576687				R4	EC:3.4.13.19	0.414795	0.998145	-0.215508
BL	EC:3.5.4.12	0.102041	0.996109	-0.121956				R2	EC:3.4.19.11	0.72918	0.822665	-0.0906264				R4	EC:3.4.13.21	0.842774	0.998145	-0.143737
BL	EC:3.5.4.13	0.261524	0.996109	-0.452866				R2	EC:3.4.19.13	0.00650271	0.0779922	0.637327				R4	EC:3.4.13.22	0.284905	0.998145	-0.467871
BL	EC:3.5.4.16	0.938813	0.996109	-0.164613				R2	EC:3.4.19.3	0.00596175	0.0779922	-0.453484				R4	EC:3.4.13.9	0.0227657	0.903833	-0.414757
BL	EC:3.5.4.19	0.556151	0.996109	-0.150353				R2	EC:3.4.19.5	0.307135	NA	-0.882353				R4	EC:3.4.14.11	0.487028	0.998145	0.549154
BL	EC:3.5.4.2	0.290831	0.996109	-0.304065				R2	EC:3.4.21.102	0.168286	0.324106	0.0058389				R4	EC:3.4.14.4	0.789033	0.998145	-0.0918106
BL	EC:3.5.4.25	0.878119	0.996109	-0.180094				R2	EC:3.4.21.105	0.780205	0.859051	0.12534				R4	EC:3.4.14.5	0.920533	0.998145	-0.12628
BL	EC:3.5.4.26	0.877969	0.996109	-0.180107				R2	EC:3.4.21.107	0.0746724	0.214636	0.311154				R4	EC:3.4.15.1	0.366087	0.998145	-0.933665
BL	EC:3.5.4.28	0.622689	0.996109	-0.216561				R2	EC:3.4.21.116	0.0958593	0.229421	0.379498				R4	EC:3.4.15.5	0.879277	0.998145	-0.116651
BL	EC:3.5.4.3	0.278015	0.996109	-0.272054				R2	EC:3.4.21.19	0.578036	NA	-1				R4	EC:3.4.15.6	0.360349	0.998145	-0.97343
BL	EC:3.5.4.31	0.622689	0.996109	-0.216561				R2	EC:3.4.21.26	0.527067	0.653615	0.209746				R4	EC:3.4.16.4	0.830831	0.998145	-0.158456
BL	EC:3.5.4.32	0.8416	0.996109	0.5				R2	EC:3.4.21.53	0.429204	0.603205	0.151566				R4	EC:3.4.17.11	0.158694	0.903833	-0.479816
BL	EC:3.5.4.33	0.188967	0.996109	-0.14141				R2	EC:3.4.21.66	0.816674	0.88056	0.666667				R4	EC:3.4.17.13	0.896042	0.998145	-0.182576
BL	EC:3.5.4.4	0.113304	0.996109	-0.366965				R2	EC:3.4.21.72	0.288223	NA	-0.666667				R4	EC:3.4.17.19	0.208529	0.94377	-0.311061
BL	EC:3.5.4.5	0.965108	0.996944	-0.159932				R2	EC:3.4.21.83	0.00251237	0.0598783	-0.964344				R4	EC:3.4.19.1	0.171804	0.903833	0.220727
BL	EC:3.5.4.9	0.191643	0.996109	-0.141463				R2	EC:3.4.21.88	0.158419	0.310328	0.282061				R4	EC:3.4.19.11	0.99072	0.998145	-0.152606
BL	EC:3.5.5.1	0.710811	0.996109	1.5				R2	EC:3.4.21.89	0.672542	0.777946	0.135556				R4	EC:3.4.19.13	0.0566397	0.903833	-0.629143
BL	EC:3.5.99.10	0.128707	0.996109	-0.139297				R2	EC:3.4.21.92	0.043488	0.172148	0.224987				R4	EC:3.4.19.3	0.253197	0.981987	-0.30261
BL	EC:3.5.99.2	0.457047	0.996109	-0.033991				R2	EC:3.4.21.96	0.028221	0.141859	3.06667				R4	EC:3.4.19.5	0.417363	0.998145	-0.996612
BL	EC:3.5.99.3	0.352931	0.996109	-0.4318				R2	EC:3.4.22.40	0.0344549	0.155796	-0.2619				R4	EC:3.4.21.102	0.584168	0.998145	-0.109985
BL	EC:3.5.99.6	0.702257	0.996109	-0.139842				R2	EC:3.4.22.70	0.0645138	0.201087	0.382464				R4	EC:3.4.21.105	0.82068	0.998145	-0.14088
BL	EC:3.5.99.7	0.697284	0.996109	-1				R2	EC:3.4.23.36	0.0523247	0.181857	0.184471				R4	EC:3.4.21.107	0.864185	0.998145	-0.151151
BL	EC:3.6.1.1	0.985289	0.996944	-0.153866				R2	EC:3.4.23.43	0.705878	0.80511	0.160658				R4	EC:3.4.21.116	0.796165	0.998145	-0.147494
BL	EC:3.6.1.11	0.366392	0.996109	-0.199639				R2	EC:3.4.23.48	0.615012	NA	-1				R4	EC:3.4.21.26	0.982093	0.998145	-0.101222
BL	EC:3.6.1.13	0.919773	0.996109	-0.167142				R2	EC:3.4.23.49	0.615012	NA	-1				R4	EC:3.4.21.53	0.528967	0.998145	-0.169649
BL	EC:3.6.1.15	0.389522	0.996109	1.47059				R2	EC:3.4.23.51	0.274694	0.436969	-0.463415				R4	EC:3.4.21.62	0.765069	0.998145	-1
BL	EC:3.6.1.22	0.496162	0.996109	-0.244302				R2	EC:3.4.24.11	0.518992	NA	-1				R4	EC:3.4.21.66	0.461154	0.998145	0.8107
BL	EC:3.6.1.23	0.190209	0.996109	-0.141438				R2	EC:3.4.24.15	0.708194	NA	-1				R4	EC:3.4.21.72	0.747141	0.998145	-0.444444
BL	EC:3.6.1.25	0.579702	0.996109	Inf				R2	EC:3.4.24.28	0.808327	NA	-0.5				R4	EC:3.4.21.83	0.105251	0.903833	-0.991838
BL	EC:3.6.1.26	0.579702	0.996109	Inf				R2	EC:3.4.24.29	0.578036	NA	-1				R4	EC:3.4.21.88	0.826121	0.998145	-0.179107
BL	EC:3.6.1.27	0.047861	0.996109	-0.135247				R2	EC:3.4.24.40	1	NA	-1				R4	EC:3.4.21.89	0.364708	0.998145	-0.133061
BL	EC:3.6.1.31	0.410278	0.996109	-0.134961				R2	EC:3.4.24.55	0.615012	NA	-1				R4	EC:3.4.21.92	0.271074	0.998145	-0.120447
BL	EC:3.6.1.40	0.366392	0.996109	-0.199639				R2	EC:3.4.24.70	0.703802	NA	-0.888889				R4	EC:3.4.21.96	0.29748	0.998145	0.904762
BL	EC:3.6.1.41	0.162488	0.996109	0.254587				R2	EC:3.4.24.75	0.874137	NA	-1				R4	EC:3.4.22.40	0.682633	0.998145	-0.062764
BL	EC:3.6.1.45	0.329767	0.996109	Inf				R2	EC:3.4.24.78	0.0952255	0.228861	0.379953				R4	EC:3.4.22.70	0.324504	0.998145	-0.099409
BL	EC:3.6.1.54	0.641922	0.996109	-0.113871				R2	EC:3.4.24.84	0.708194	NA	-1				R4	EC:3.4.23.36	0.345045	0.998145	-0.132064
BL	EC:3.6.1.55	0.711959	0.996109	-0.183896				R2	EC:3.4.25.1	1	NA	-1				R4	EC:3.4.23.43	0.414117	0.998145	-0.220588
BL	EC:3.6.1.63	0.750396	0.996109	Inf				R2	EC:3.4.25.2	0.0626128	0.19897	-0.500136				R4	EC:3.4.23.48	1	NA	-1
BL	EC:3.6.1.65	0.750396	0.996109	Inf				R2	EC:3.5.1.1	0.381006	0.550342	0.115253				R4	EC:3.4.23.49	1	NA	-1
BL	EC:3.6.1.66	0.433248	0.996109	-0.13458				R2	EC:3.5.1.10	0.029558	0.143297	-0.364072				R4	EC:3.4.23.51	0.347111	0.998145	-0.982914
BL	EC:3.6.1.7	0.00253777	0.996109	-0.315166				R2	EC:3.5.1.101	1	NA	-1				R4	EC:3.4.24.15	1	NA	-1
BL	EC:3.6.1.8	0.437878	0.996109	3.5				R2	EC:3.5.1.103	1	NA	-1				R4	EC:3.4.24.40	0.990628	0.998145	-0.965636
BL	EC:3.6.3.12	0.521526	0.996109	-0.196369				R2	EC:3.5.1.105	0.531366	0.657171	-0.949664				R4	EC:3.4.24.55	1	NA	-1
BL	EC:3.6.3.14	0.880387	0.996109	-0.157342				R2	EC:3.5.1.106	1	NA	-1				R4	EC:3.4.24.70	0.803137	0.998145	-0.998329
BL	EC:3.6.3.16	0.686077	0.996109	-0.293919				R2	EC:3.5.1.107	1	NA	-1				R4	EC:3.4.24.71	1	NA	-1
BL	EC:3.6.3.17	0.945337	0.996109	-0.150029				R2	EC:3.5.1.108	0.210456	0.363232	-0.090258				R4	EC:3.4.24.78	0.802096	0.998145	-0.148346
BL	EC:3.6.3.2	0.854744	0.996109	-0.173056				R2	EC:3.5.1.11	0.895191	NA	-0.777778				R4	EC:3.4.24.84	0.911304	0.998145	-1
BL	EC:3.6.3.20	0.356426	0.996109	-0.430578				R2	EC:3.5.1.115	1	NA	-1				R4	EC:3.4.25.1	1	NA	-1
BL	EC:3.6.3.21	0.98125	0.996944	-0.157086				R2	EC:3.5.1.118	0.682969	NA	-0.97561				R4	EC:3.4.25.2	0.426349	0.998145	-0.445615
BL	EC:3.6.3.24	0.356039	0.996109	-0.431245				R2	EC:3.5.1.16	0.116357	0.255081	-0.172959				R4	EC:3.5.1.1	0.55312	0.998145	-0.183398
BL	EC:3.6.3.25	0.575455	0.996109	0.130411				R2	EC:3.5.1.18	0.0891002	0.222556	-0.0946674				R4	EC:3.5.1.10	0.897511	0.998145	-0.161666
BL	EC:3.6.3.27	0.930192	0.996109	-0.16105				R2	EC:3.5.1.19	0.615012	NA	-1				R4	EC:3.5.1.100	0.984308	0.998145	-1
BL	EC:3.6.3.28	0.816053	0.996109	-0.264463				R2	EC:3.5.1.2	0.103749	0.236904	-0.16524				R4	EC:3.5.1.101	0.862073	0.998145	-0.917695
BL	EC:3.6.3.29	0.0993663	0.996109	-0.28966				R2	EC:3.5.1.23	0.845278	NA	-0.92				R4	EC:3.5.1.103	1	NA	-1
BL	EC:3.6.3.3	0.869599	0.996109	-0.162861				R2	EC:3.5.1.24	0.0129422	0.0994933	-0.134056				R4	EC:3.5.1.105	0.509855	0.998145	-0.979798
BL	EC:3.6.3.30	0.301548	0.996109	-0.314404				R2	EC:3.5.1.25	0.30967	0.471117	0.259319				R4	EC:3.5.1.106	0.576881	0.998145	-0.84127
BL	EC:3.6.3.31	0.74496	0.996109	-0.130419				R2	EC:3.5.1.26	0.082249	0.221879	-0.35956				R4	EC:3.5.1.107	0.576881	0.998145	-0.84127
BL	EC:3.6.3.32	0.661362	0.996109	0				R2	EC:3.5.1.28	0.0875136	0.221879	0.271556				R4	EC:3.5.1.108	0.950983	0.998145	-0.131237
BL	EC:3.6.3.33	0.579702	0.996109	Inf				R2	EC:3.5.1.32	0.00825454	0.0809589	-0.225726				R4	EC:3.5.1.11	0.903699	0.998145	-0.98802
BL	EC:3.6.3.34	0.294018	0.996109	-0.123131				R2	EC:3.5.1.38	1	NA	-1				R4	EC:3.5.1.110	1	NA	-1
BL	EC:3.6.3.36	0.503422	0.996109	2.5				R2	EC:3.5.1.4	0.0831543	0.221879	-0.422909				R4	EC:3.5.1.115	1	NA	-1
BL	EC:3.6.3.4	0.416509	0.996109	-0.189345				R2	EC:3.5.1.42	0.601727	0.718554	0.165635				R4	EC:3.5.1.118	0.92752	0.998145	-0.999087
BL	EC:3.6.3.40	0.638402	0.996109	-0.221165				R2	EC:3.5.1.44	0.00979536	0.0861991	0.502135				R4	EC:3.5.1.16	0.722878	0.998145	-0.193018
BL	EC:3.6.3.41	0.285089	0.996109	0.178571				R2	EC:3.5.1.46	1	NA	-1				R4	EC:3.5.1.18	0.0616816	0.903833	-0.31354
BL	EC:3.6.3.44	0.841272	0.996109	Inf				R2	EC:3.5.1.47	0.455907	NA	-0.806452				R4	EC:3.5.1.19	0.839662	0.998145	-0.997821
BL	EC:3.6.3.5	0.869599	0.996109	-0.162861				R2	EC:3.5.1.49	1	NA	-1				R4	EC:3.5.1.2	0.999757	0.999757	-0.154789
BL	EC:3.6.3.54	0.527079	0.996109	-0.113068				R2	EC:3.5.1.5	0.284387	0.443288	-0.993355				R4	EC:3.5.1.23	0.896222	0.998145	-1
BL	EC:3.6.3.55	0.613273	0.996109	-0.692308				R2	EC:3.5.1.53	0.0299224	0.143829	-0.46275				R4	EC:3.5.1.24	0.496819	0.998145	-0.0962248
BL	EC:3.6.3.8	0.383705	0.996109	-0.114754				R2	EC:3.5.1.54	1	NA	-1				R4	EC:3.5.1.25	0.548119	0.998145	-0.215523
BL	EC:3.6.4.12	0.0764761	0.996109	-0.137155				R2	EC:3.5.1.78	0.560311	NA	-1				R4	EC:3.5.1.26	0.24125	0.964128	-0.444107
BL	EC:3.6.4.13	0.971696	0.996944	-0.158849				R2	EC:3.5.1.81	0.278453	0.436969	-0.0831155				R4	EC:3.5.1.28	0.557541	0.998145	-0.18824
BL	EC:3.7.1.12	0.758094	0.996109	-0.134583				R2	EC:3.5.1.82	0.518992	NA	-1				R4	EC:3.5.1.32	0.0126502	0.903833	-0.498061
BL	EC:3.7.1.14	0.750396	0.996109	Inf				R2	EC:3.5.1.87	0.0733256	0.213447	-0.299162				R4	EC:3.5.1.38	0.92752	0.998145	-0.965278
BL	EC:3.7.1.17	0.662859	0.996109	Inf				R2	EC:3.5.1.88	0.619368	0.734256	0.143328				R4	EC:3.5.1.4	0.119065	0.903833	-0.519776
BL	EC:3.7.1.2	0.941168	0.996109	-0.25				R2	EC:3.5.1.9	0.916542	0.942917	0.065365				R4	EC:3.5.1.42	0.852729	0.998145	-0.144162
BL	EC:3.7.1.22	0.919948	0.996109	-0.207143				R2	EC:3.5.1.96	0.615012	NA	-1				R4	EC:3.5.1.44	0.253096	0.981987	-0.0282453
BL	EC:3.7.1.3	0.878172	0.996109	-1				R2	EC:3.5.1.97	0.945813	NA	-0.928571				R4	EC:3.5.1.46	0.92752	0.998145	-0.959596
BL	EC:3.8.1.2	0.890891	0.996109	-0.135823				R2	EC:3.5.2.10	0.0857013	0.221879	-0.414629				R4	EC:3.5.1.47	0.951458	0.998145	-0.888889
BL	EC:3.8.1.3	0.750396	0.996109	Inf				R2	EC:3.5.2.14	0.845278	NA	-0.909091				R4	EC:3.5.1.49	0.440872	0.998145	-0.883041
BL	EC:4.1.1.11	0.966688	0.996944	-0.164597				R2	EC:3.5.2.17	0.938388	NA	-0.96				R4	EC:3.5.1.5	0.896562	0.998145	-0.989767
BL	EC:4.1.1.12	0.61991	0.996109	-0.0297243				R2	EC:3.5.2.2	0.0131318	0.0994933	-0.2335				R4	EC:3.5.1.53	0.731003	0.998145	-0.11489
BL	EC:4.1.1.15	0.640412	0.996109	-0.11374				R2	EC:3.5.2.3	0.937537	0.959575	0.121726				R4	EC:3.5.1.54	0.92752	0.998145	-0.987988
BL	EC:4.1.1.17	0.596649	0.996109	-0.469968				R2	EC:3.5.2.5	0.112551	0.250015	-0.362966				R4	EC:3.5.1.59	1	NA	-1
BL	EC:4.1.1.18	0.508421	0.996109	0.073922				R2	EC:3.5.2.6	0.0253671	0.134199	-0.137914				R4	EC:3.5.1.68	1	NA	-1
BL	EC:4.1.1.19	0.919773	0.996109	-0.175355				R2	EC:3.5.2.7	0.469193	0.620089	0.223643				R4	EC:3.5.1.78	1	NA	-1
BL	EC:4.1.1.2	0.750396	0.996109	Inf				R2	EC:3.5.2.9	0.578036	NA	-1				R4	EC:3.5.1.81	0.10531	0.903833	-0.39829
BL	EC:4.1.1.20	0.958903	0.996944	-0.155468				R2	EC:3.5.3.1	0.182394	0.343754	-0.986207				R4	EC:3.5.1.87	0.172423	0.903833	-0.382821
BL	EC:4.1.1.23	0.187655	0.996109	-0.140915				R2	EC:3.5.3.11	0.144284	0.293182	0.330782				R4	EC:3.5.1.88	0.447095	0.998145	-0.13893
BL	EC:4.1.1.3	0.709477	0.996109	-0.141044				R2	EC:3.5.3.12	0.0498649	0.181857	-0.401885				R4	EC:3.5.1.9	0.595972	0.998145	-0.0867446
BL	EC:4.1.1.31	0.22584	0.996109	-0.493213				R2	EC:3.5.3.13	1	NA	-1				R4	EC:3.5.1.94	1	NA	-1
BL	EC:4.1.1.32	0.610784	0.996109	-0.0883346				R2	EC:3.5.3.18	0.20487	0.358365	-0.431034				R4	EC:3.5.1.96	0.92752	0.998145	-0.99908
BL	EC:4.1.1.33	0.352025	0.996109	-0.378109				R2	EC:3.5.3.23	0.283856	NA	-0.913043				R4	EC:3.5.1.97	0.984267	0.998145	-0.974555
BL	EC:4.1.1.35	0.907979	0.996109	-0.195362				R2	EC:3.5.3.26	0.481053	NA	-1				R4	EC:3.5.2.10	0.144874	0.903833	-0.503119
BL	EC:4.1.1.36	0.598643	0.996109	-0.127748				R2	EC:3.5.3.4	1	NA	-1				R4	EC:3.5.2.14	1	NA	Inf
BL	EC:4.1.1.37	0.0159335	0.996109	-0.378181				R2	EC:3.5.3.6	0.18815	0.347054	-0.11304				R4	EC:3.5.2.17	0.92752	0.998145	-0.994995
BL	EC:4.1.1.4	0.502019	0.996109	-0.966216				R2	EC:3.5.3.7	1	NA	-1				R4	EC:3.5.2.2	0.0277741	0.903833	-0.453927
BL	EC:4.1.1.41	0.750396	0.996109	Inf				R2	EC:3.5.3.8	0.496449	0.633859	-0.87234				R4	EC:3.5.2.3	0.931702	0.998145	-0.148637
BL	EC:4.1.1.44	0.947803	0.996109	-0.156228				R2	EC:3.5.3.9	0.150401	0.301108	-0.310486				R4	EC:3.5.2.5	0.0886106	0.903833	-0.536824
BL	EC:4.1.1.47	0.934316	0.996109	0				R2	EC:3.5.4.1	0.168031	0.324106	-1				R4	EC:3.5.2.6	0.887914	0.998145	-0.154303
BL	EC:4.1.1.48	0.810963	0.996109	-0.168682				R2	EC:3.5.4.10	0.0148619	0.0994933	0.16264				R4	EC:3.5.2.7	0.696058	0.998145	-0.188953
BL	EC:4.1.1.49	0.655853	0.996109	-0.17451				R2	EC:3.5.4.12	0.59293	0.710275	0.136446				R4	EC:3.5.2.9	0.984308	0.998145	5.66667
BL	EC:4.1.1.5	0.303044	0.996109	-0.372208				R2	EC:3.5.4.13	0.94685	0.966277	0.140278				R4	EC:3.5.3.1	0.611413	0.998145	-0.996576
BL	EC:4.1.1.50	0.0601203	0.996109	0.233281				R2	EC:3.5.4.16	0.845963	0.898591	0.157737				R4	EC:3.5.3.11	0.816563	0.998145	-0.107959
BL	EC:4.1.1.55	0.750396	0.996109	Inf				R2	EC:3.5.4.19	0.00230753	0.0581741	0.185519				R4	EC:3.5.3.12	0.111422	0.903833	-0.449992
BL	EC:4.1.1.65	0.438035	0.996109	-0.213525				R2	EC:3.5.4.2	0.00925376	0.0827055	-0.2358				R4	EC:3.5.3.13	0.92752	0.998145	-0.967794
BL	EC:4.1.1.68	0.697284	0.996109	-1				R2	EC:3.5.4.25	0.24494	0.406207	-0.00498678				R4	EC:3.5.3.18	0.158783	0.903833	-0.537856
BL	EC:4.1.1.7	0.750396	0.996109	Inf				R2	EC:3.5.4.26	0.246061	0.406207	-0.00441966				R4	EC:3.5.3.23	0.591895	0.998145	-0.995429
BL	EC:4.1.1.70	0.51371	0.996109	-0.0523077				R2	EC:3.5.4.28	0.890401	0.924337	0.164555				R4	EC:3.5.3.26	1	NA	-1
BL	EC:4.1.1.73	0.353049	0.996109	-0.431624				R2	EC:3.5.4.3	0.277517	0.436969	0.00683781				R4	EC:3.5.3.3	1	NA	-1
BL	EC:4.1.1.74	0.662859	0.996109	Inf				R2	EC:3.5.4.31	0.890401	0.924337	0.164555				R4	EC:3.5.3.4	0.92752	0.998145	-0.988545
BL	EC:4.1.1.75	0.878172	0.996109	-1				R2	EC:3.5.4.32	1	NA	-1				R4	EC:3.5.3.6	0.0907487	0.903833	-0.405548
BL	EC:4.1.1.8	0.418182	0.996109	-0.377834				R2	EC:3.5.4.33	0.473926	0.620089	0.137703				R4	EC:3.5.3.7	0.92752	0.998145	-0.990123
BL	EC:4.1.1.81	0.150246	0.996109	-0.266448				R2	EC:3.5.4.4	0.15223	0.302871	-0.203408				R4	EC:3.5.3.8	0.903699	0.998145	-0.998273
BL	EC:4.1.1.85	0.808677	0.996109	-0.272727				R2	EC:3.5.4.5	0.0396174	0.166626	0.220558				R4	EC:3.5.3.9	0.0657521	0.903833	-0.566156
BL	EC:4.1.1.86	0.750396	0.996109	Inf				R2	EC:3.5.4.9	0.483839	0.621225	0.137201				R4	EC:3.5.4.1	0.749545	0.998145	-0.996125
BL	EC:4.1.1.87	0.286301	0.996109	-0.764706				R2	EC:3.5.5.1	0.876948	NA	-0.885714				R4	EC:3.5.4.10	0.376814	0.998145	-0.140049
BL	EC:4.1.1.96	0.206165	0.996109	0.0503011				R2	EC:3.5.99.10	0.0101198	0.0870451	0.17096				R4	EC:3.5.4.12	0.165318	0.903833	-0.109996
BL	EC:4.1.1.97	0.502019	0.996109	Inf				R2	EC:3.5.99.2	0.550889	0.674751	0.40506				R4	EC:3.5.4.13	0.41542	0.998145	-0.3116
BL	EC:4.1.1.98	0.333629	0.996109	-0.269847				R2	EC:3.5.99.3	0.0881612	0.221879	-0.418524				R4	EC:3.5.4.16	0.740651	0.998145	-0.1346
BL	EC:4.1.2.13	0.296171	0.996109	-0.223311				R2	EC:3.5.99.6	0.136671	0.283247	0.0441779				R4	EC:3.5.4.19	0.0224594	0.903833	-0.114023
BL	EC:4.1.2.14	0.721662	0.996109	-0.175084				R2	EC:3.5.99.7	1	NA	-1				R4	EC:3.5.4.2	0.0175942	0.903833	-0.455403
BL	EC:4.1.2.17	0.443225	0.996109	-0.237614				R2	EC:3.6.1.1	0.237197	0.394984	0.0650974				R4	EC:3.5.4.25	0.911563	0.998145	-0.145027
BL	EC:4.1.2.19	0.679171	0.996109	-0.264857				R2	EC:3.6.1.11	0.83356	0.892542	0.089194				R4	EC:3.5.4.26	0.857554	0.998145	-0.139527
BL	EC:4.1.2.20	0.511752	0.996109	-0.0352074				R2	EC:3.6.1.13	0.115771	0.255081	0.306745				R4	EC:3.5.4.28	0.422332	0.998145	-0.274888
BL	EC:4.1.2.21	0.755983	0.996109	1				R2	EC:3.6.1.15	1	NA	-1				R4	EC:3.5.4.3	0.00713653	0.903833	-0.452495
BL	EC:4.1.2.22	0.612355	0.996109	-0.0702667				R2	EC:3.6.1.22	0.104583	0.237315	0.30574				R4	EC:3.5.4.31	0.422332	0.998145	-0.274888
BL	EC:4.1.2.25	0.968838	0.996944	-0.158957				R2	EC:3.6.1.23	0.474657	0.620089	0.137671				R4	EC:3.5.4.32	0.92752	0.998145	-0.98645
BL	EC:4.1.2.4	0.333679	0.996109	-0.195834				R2	EC:3.6.1.25	0.615012	NA	-1				R4	EC:3.5.4.33	0.136788	0.903833	-0.122218
BL	EC:4.1.2.40	0.629479	0.996109	-0.194281				R2	EC:3.6.1.26	0.682969	NA	-0.75				R4	EC:3.5.4.4	0.164446	0.903833	-0.381672
BL	EC:4.1.2.41	0.878172	0.996109	-1				R2	EC:3.6.1.27	0.565268	0.687943	0.141491				R4	EC:3.5.4.40	1	NA	-1
BL	EC:4.1.2.43	0.89109	0.996109	0.346154				R2	EC:3.6.1.31	0.268934	0.435164	0.184441				R4	EC:3.5.4.5	0.155463	0.903833	-0.122265
BL	EC:4.1.2.5	0.918528	0.996109	-0.165188				R2	EC:3.6.1.40	0.83356	0.892542	0.089194				R4	EC:3.5.4.9	0.150016	0.903833	-0.125352
BL	EC:4.1.2.50	0.870356	0.996109	-0.175703				R2	EC:3.6.1.41	0.068987	0.20681	1.08115				R4	EC:3.5.5.1	0.945542	0.998145	-0.883041
BL	EC:4.1.2.52	0.792493	0.996109	-0.22406				R2	EC:3.6.1.45	0.560311	NA	-1				R4	EC:3.5.5.7	1	NA	-1
BL	EC:4.1.2.53	0.750396	0.996109	Inf				R2	EC:3.6.1.54	0.189391	0.347054	-0.130675				R4	EC:3.5.99.10	0.395502	0.998145	-0.140995
BL	EC:4.1.2.57	0.750396	0.996109	Inf				R2	EC:3.6.1.55	0.0416083	0.168794	0.401088				R4	EC:3.5.99.2	0.434873	0.998145	-0.316381
BL	EC:4.1.2.9	0.612355	0.996109	-0.0702667				R2	EC:3.6.1.65	0.615012	NA	-1				R4	EC:3.5.99.3	0.203031	0.941367	-0.496133
BL	EC:4.1.3.1	0.437878	0.996109	3.5				R2	EC:3.6.1.66	0.201957	0.355867	0.0591758				R4	EC:3.5.99.6	0.898526	0.998145	-0.153912
BL	EC:4.1.3.25	0.878172	0.996109	-1				R2	EC:3.6.1.7	0.956221	0.968925	0.0909215				R4	EC:3.5.99.7	0.862073	0.998145	-0.979706
BL	EC:4.1.3.27	0.486886	0.996109	-0.183479				R2	EC:3.6.1.8	0.253266	0.416288	-0.84				R4	EC:3.6.1.1	0.174133	0.903833	-0.184832
BL	EC:4.1.3.3	0.471634	0.996109	-0.202852				R2	EC:3.6.3.12	0.0310948	0.146388	-0.135806				R4	EC:3.6.1.11	0.258522	0.981987	-0.11836
BL	EC:4.1.3.30	0.934316	0.996109	0				R2	EC:3.6.3.14	0.218942	0.373277	0.182158				R4	EC:3.6.1.13	0.519222	0.998145	-0.10393
BL	EC:4.1.3.34	0.329916	0.996109	-0.384641				R2	EC:3.6.3.16	0.859977	0.909255	-0.226667				R4	EC:3.6.1.15	0.751444	0.998145	-0.989316
BL	EC:4.1.3.36	0.607418	0.996109	-0.0224526				R2	EC:3.6.3.17	0.0433906	0.172148	0.435641				R4	EC:3.6.1.22	0.716918	0.998145	-0.136495
BL	EC:4.1.3.38	0.548915	0.996109	-0.272628				R2	EC:3.6.3.2	0.00129888	0.0424548	-0.931122				R4	EC:3.6.1.23	0.145435	0.903833	-0.124511
BL	EC:4.1.3.39	0.61848	0.996109	-0.265812				R2	EC:3.6.3.20	0.087516	0.221879	-0.419783				R4	EC:3.6.1.25	1	NA	-1
BL	EC:4.1.3.4	0.353428	0.996109	-0.431448				R2	EC:3.6.3.21	0.305058	0.465936	0.247002				R4	EC:3.6.1.26	0.996803	0.998815	-0.999517
BL	EC:4.1.3.40	0.503422	0.996109	2.5				R2	EC:3.6.3.24	0.0876587	0.221879	-0.419011				R4	EC:3.6.1.27	0.372175	0.998145	-0.137811
BL	EC:4.1.3.41	0.662859	0.996109	Inf				R2	EC:3.6.3.25	0.983884	0.988203	0.23986				R4	EC:3.6.1.31	0.356802	0.998145	-0.129008
BL	EC:4.1.3.42	0.721662	0.996109	-0.175084				R2	EC:3.6.3.27	0.17459	0.333998	0.236706				R4	EC:3.6.1.40	0.258522	0.981987	-0.11836
BL	EC:4.1.3.43	0.662859	0.996109	Inf				R2	EC:3.6.3.28	0.00167309	0.0474135	-0.935931				R4	EC:3.6.1.41	0.0329285	0.903833	-0.773169
BL	EC:4.1.99.1	0.946795	0.996109	-0.188348				R2	EC:3.6.3.29	0.366025	0.535925	0.0369206				R4	EC:3.6.1.45	0.607114	0.998145	-1
BL	EC:4.1.99.12	0.877786	0.996109	-0.180118				R2	EC:3.6.3.3	0.0917021	0.224957	0.338486				R4	EC:3.6.1.54	0.972137	0.998145	-0.143658
BL	EC:4.1.99.14	0.371223	0.996109	-0.329101				R2	EC:3.6.3.30	0.0186156	0.110528	-0.249555				R4	EC:3.6.1.55	0.543447	0.998145	-0.115431
BL	EC:4.1.99.17	0.843981	0.996109	-0.177467				R2	EC:3.6.3.31	0.0839503	0.221879	0.360522				R4	EC:3.6.1.63	1	NA	-1
BL	EC:4.1.99.18	0.161516	0.996109	-0.268605				R2	EC:3.6.3.32	0.834027	0.892542	-0.65				R4	EC:3.6.1.65	1	NA	-1
BL	EC:4.1.99.19	0.483806	0.996109	-0.116706				R2	EC:3.6.3.33	0.615012	NA	-1				R4	EC:3.6.1.66	0.48371	0.998145	-0.116907
BL	EC:4.1.99.3	0.569733	0.996109	7.5				R2	EC:3.6.3.34	0.352036	0.522257	0.0866857				R4	EC:3.6.1.7	0.859425	0.998145	-0.176523
BL	EC:4.2.1.1	0.508952	0.996109	-0.316327				R2	EC:3.6.3.36	0.615012	NA	-1				R4	EC:3.6.1.8	0.480681	0.998145	-0.995218
BL	EC:4.2.1.10	0.192311	0.996109	-0.141413				R2	EC:3.6.3.4	0.371455	0.541331	0.0414293				R4	EC:3.6.3.12	0.361861	0.998145	-0.227573
BL	EC:4.2.1.101	0.878172	0.996109	-1				R2	EC:3.6.3.40	0.00989673	0.0864264	0.454539				R4	EC:3.6.3.14	0.751859	0.998145	-0.151972
BL	EC:4.2.1.103	0.934316	0.996109	0				R2	EC:3.6.3.41	0.10253	0.234589	-0.5375				R4	EC:3.6.3.16	0.97724	0.998145	-0.239983
BL	EC:4.2.1.108	0.662859	0.996109	Inf				R2	EC:3.6.3.44	0.42888	NA	-0.909091				R4	EC:3.6.3.17	0.74237	0.998145	-0.199748
BL	EC:4.2.1.11	0.756516	0.996109	-0.14731				R2	EC:3.6.3.5	0.0917021	0.224957	0.338486				R4	EC:3.6.3.2	0.585095	0.998145	-0.49384
BL	EC:4.2.1.113	0.253535	0.996109	0.210526				R2	EC:3.6.3.54	0.192195	0.347898	0.284963				R4	EC:3.6.3.20	0.0671575	0.903833	-0.612657
BL	EC:4.2.1.12	0.692297	0.996109	1.5				R2	EC:3.6.3.55	0.753261	NA	-0.625				R4	EC:3.6.3.21	0.87025	0.998145	-0.170464
BL	EC:4.2.1.120	0.875625	0.996109	-0.128893				R2	EC:3.6.3.6	0.518992	NA	-1				R4	EC:3.6.3.24	0.04112	0.903833	-0.678811
BL	EC:4.2.1.126	0.832359	0.996109	-0.0863502				R2	EC:3.6.3.8	0.0364207	0.159637	0.0303196				R4	EC:3.6.3.25	0.180389	0.903833	-0.54851
BL	EC:4.2.1.130	0.750396	0.996109	Inf				R2	EC:3.6.4.12	0.346558	0.515556	0.139986				R4	EC:3.6.3.27	0.994793	0.998145	-0.140371
BL	EC:4.2.1.132	0.662859	0.996109	Inf				R2	EC:3.6.4.13	0.309685	0.471117	0.0862392				R4	EC:3.6.3.28	0.823848	0.998145	-0.00153338
BL	EC:4.2.1.149	0.585092	0.996109	-0.342657				R2	EC:3.7.1.12	0.0676459	0.2053	0.373012				R4	EC:3.6.3.29	0.01806	0.903833	-0.35955
BL	EC:4.2.1.151	0.962879	0.996944	-0.183952				R2	EC:3.7.1.14	0.390201	NA	-1				R4	EC:3.6.3.3	0.826962	0.998145	-0.148988
BL	EC:4.2.1.17	0.689095	0.996109	-0.129062				R2	EC:3.7.1.17	0.518992	NA	-1				R4	EC:3.6.3.30	0.0376662	0.903833	-0.43634
BL	EC:4.2.1.18	0.755983	0.996109	1				R2	EC:3.7.1.2	0.945813	NA	-0.955556				R4	EC:3.6.3.31	0.853675	0.998145	-0.163901
BL	EC:4.2.1.19	0.611114	0.996109	-0.140471				R2	EC:3.7.1.20	0.708194	NA	-1				R4	EC:3.6.3.32	0.463051	0.998145	-0.976041
BL	EC:4.2.1.2	0.701347	0.996109	-0.161575				R2	EC:3.7.1.22	0.976841	0.982311	-0.0625				R4	EC:3.6.3.33	1	NA	-1
BL	EC:4.2.1.20	0.827916	0.996109	-0.151604				R2	EC:3.7.1.3	0.845278	NA	-0.904762				R4	EC:3.6.3.34	0.542644	0.998145	-0.186318
BL	EC:4.2.1.22	0.817207	0.996109	0.427083				R2	EC:3.7.1.5	0.874137	NA	-1				R4	EC:3.6.3.36	0.904766	0.998145	-0.997989
BL	EC:4.2.1.24	0.700892	0.996109	-0.199417				R2	EC:3.8.1.2	0.334824	0.502533	0.050228				R4	EC:3.6.3.4	0.32994	0.998145	-0.105322
BL	EC:4.2.1.28	0.601131	0.996109	-0.363218				R2	EC:4.1.1.11	0.272807	0.436492	-0.0405999				R4	EC:3.6.3.40	0.373487	0.998145	-0.0403815
BL	EC:4.2.1.3	0.521636	0.996109	-0.189927				R2	EC:4.1.1.12	0.0486979	0.179711	-0.480164				R4	EC:3.6.3.41	0.68247	0.998145	-0.975771
BL	EC:4.2.1.32	0.35255	0.996109	-0.432031				R2	EC:4.1.1.15	0.189005	0.347054	-0.130791				R4	EC:3.6.3.44	0.794407	0.998145	-0.923372
BL	EC:4.2.1.33	0.358616	0.996109	-0.182875				R2	EC:4.1.1.17	0.000176956	0.0144599	-0.941502				R4	EC:3.6.3.5	0.826962	0.998145	-0.148988
BL	EC:4.2.1.35	0.358616	0.996109	-0.182875				R2	EC:4.1.1.18	0.0498267	0.181857	0.755132				R4	EC:3.6.3.54	0.909256	0.998145	-0.139908
BL	EC:4.2.1.40	0.348343	0.996109	-0.431741				R2	EC:4.1.1.19	0.200651	0.355867	-0.097639				R4	EC:3.6.3.55	0.990042	0.998145	-0.259259
BL	EC:4.2.1.41	0.878172	0.996109	-1				R2	EC:4.1.1.20	0.396613	0.568578	0.138353				R4	EC:3.6.3.6	1	NA	-1
BL	EC:4.2.1.42	0.755983	0.996109	1				R2	EC:4.1.1.23	0.862919	0.909843	0.131045				R4	EC:3.6.3.8	0.854974	0.998145	-0.156505
BL	EC:4.2.1.44	0.954526	0.996109	-0.229167				R2	EC:4.1.1.3	0.0238216	0.131652	0.257694				R4	EC:3.6.4.12	0.0453237	0.903833	-0.125226
BL	EC:4.2.1.45	0.561572	0.996109	-0.241257				R2	EC:4.1.1.31	0.0678351	0.2053	-0.301495				R4	EC:3.6.4.13	0.118487	0.903833	-0.223422
BL	EC:4.2.1.46	0.836981	0.996109	-0.148435				R2	EC:4.1.1.32	0.199538	0.354458	0.520786				R4	EC:3.7.1.12	0.825184	0.998145	-0.156665
BL	EC:4.2.1.47	0.500934	0.996109	-0.195453				R2	EC:4.1.1.33	0.00899768	0.0820302	-0.927588				R4	EC:3.7.1.14	1	NA	-1
BL	EC:4.2.1.49	0.984742	0.996944	-0.178652				R2	EC:4.1.1.35	0.522977	0.653615	0.211466				R4	EC:3.7.1.17	1	NA	-1
BL	EC:4.2.1.5	0.352931	0.996109	-0.4318				R2	EC:4.1.1.36	0.760294	0.841176	0.131827				R4	EC:3.7.1.2	0.739552	0.998145	-0.969489
BL	EC:4.2.1.51	0.146715	0.996109	-0.139804				R2	EC:4.1.1.37	0.429951	0.603514	-0.00533562				R4	EC:3.7.1.20	1	NA	-1
BL	EC:4.2.1.53	0.328739	0.996109	-0.317179				R2	EC:4.1.1.39	0.708194	NA	-1				R4	EC:3.7.1.22	0.827265	0.998145	-0.395097
BL	EC:4.2.1.55	0.448219	0.996109	-1				R2	EC:4.1.1.4	0.361256	NA	-1				R4	EC:3.7.1.3	0.92752	0.998145	-0.989759
BL	EC:4.2.1.56	0.878172	0.996109	-1				R2	EC:4.1.1.41	0.615012	NA	-1				R4	EC:3.8.1.2	0.170257	0.903833	-0.324991
BL	EC:4.2.1.57	0.8416	0.996109	0.5				R2	EC:4.1.1.44	0.118848	0.257965	0.0277201				R4	EC:3.8.1.5	1	NA	-1
BL	EC:4.2.1.59	0.120979	0.996109	-0.139344				R2	EC:4.1.1.45	1	NA	-1				R4	EC:4.1.1.11	0.752865	0.998145	-0.115645
BL	EC:4.2.1.6	0.34804	0.996109	-0.427986				R2	EC:4.1.1.47	0.615012	NA	-1				R4	EC:4.1.1.12	0.760296	0.998145	-0.0969054
BL	EC:4.2.1.7	0.435196	0.996109	-0.279434				R2	EC:4.1.1.48	0.767567	0.848402	0.108334				R4	EC:4.1.1.15	0.955285	0.998145	-0.162692
BL	EC:4.2.1.75	0.881463	0.996109	-0.155527				R2	EC:4.1.1.49	0.5405	0.663628	0.0836869				R4	EC:4.1.1.17	0.496799	0.998145	-0.541391
BL	EC:4.2.1.77	0.228166	0.996109	0.883333				R2	EC:4.1.1.5	0.0048462	0.0749877	-0.925893				R4	EC:4.1.1.18	0.201792	0.941367	-0.714427
BL	EC:4.2.1.79	0.934316	0.996109	0				R2	EC:4.1.1.50	0.0696925	0.20681	0.794684				R4	EC:4.1.1.19	0.906643	0.998145	-0.16442
BL	EC:4.2.1.8	0.701797	0.996109	-0.197174				R2	EC:4.1.1.55	0.874137	NA	-1				R4	EC:4.1.1.2	0.765069	0.998145	-1
BL	EC:4.2.1.80	0.692297	0.996109	1.5				R2	EC:4.1.1.65	0.0177058	0.107742	-0.107415				R4	EC:4.1.1.20	0.757726	0.998145	-0.146825
BL	EC:4.2.1.83	0.352931	0.996109	-0.4318				R2	EC:4.1.1.68	1	NA	-1				R4	EC:4.1.1.22	1	NA	-1
BL	EC:4.2.1.84	0.872518	0.996109	-0.5				R2	EC:4.1.1.70	0.188729	0.347054	0.624757				R4	EC:4.1.1.23	0.199717	0.941367	-0.128493
BL	EC:4.2.1.9	0.366391	0.996109	-0.197648				R2	EC:4.1.1.71	1	NA	-1				R4	EC:4.1.1.3	0.487308	0.998145	-0.138455
BL	EC:4.2.1.90	0.750396	0.996109	Inf				R2	EC:4.1.1.73	0.087515	0.221879	-0.420202				R4	EC:4.1.1.31	0.815994	0.998145	-0.18101
BL	EC:4.2.1.91	0.692297	0.996109	1.5				R2	EC:4.1.1.74	0.103222	NA	-0.833333				R4	EC:4.1.1.32	0.192248	0.929407	-0.0320424
BL	EC:4.2.1.96	0.878172	0.996109	2.5				R2	EC:4.1.1.75	1	NA	-1				R4	EC:4.1.1.33	0.439618	0.998145	0.536286
BL	EC:4.2.1.99	0.643554	0.996109	0.8				R2	EC:4.1.1.77	0.518992	NA	-1				R4	EC:4.1.1.35	0.939195	0.998145	-0.113914
BL	EC:4.2.2.1	0.753369	0.996109	0.298319				R2	EC:4.1.1.8	0.03886	0.164651	-0.935542				R4	EC:4.1.1.36	0.690566	0.998145	-0.135282
BL	EC:4.2.2.10	0.878172	0.996109	-1				R2	EC:4.1.1.81	0.721176	0.817484	0.220453				R4	EC:4.1.1.37	0.0411219	0.903833	-0.353808
BL	EC:4.2.2.2	0.934316	0.996109	0				R2	EC:4.1.1.85	0.800042	0.872496	-0.285714				R4	EC:4.1.1.39	1	NA	-1
BL	EC:4.2.2.20	0.697284	0.996109	4.25				R2	EC:4.1.1.86	0.811448	NA	-0.666667				R4	EC:4.1.1.4	0.822101	0.998145	-0.994856
BL	EC:4.2.2.21	0.697284	0.996109	4.25				R2	EC:4.1.1.87	0.759958	0.841176	-0.609756				R4	EC:4.1.1.41	1	NA	-1
BL	EC:4.2.2.23	0.226748	0.996109	-0.662338				R2	EC:4.1.1.96	0.0648325	0.201087	-0.129161				R4	EC:4.1.1.44	0.532001	0.998145	-0.12562
BL	EC:4.2.2.3	0.878172	0.996109	-1				R2	EC:4.1.1.97	0.518992	NA	-1				R4	EC:4.1.1.47	0.92752	0.998145	-0.999018
BL	EC:4.2.2.7	0.878172	0.996109	-1				R2	EC:4.1.1.98	0.990293	0.990293	0.100948				R4	EC:4.1.1.48	0.282767	0.998145	-0.122809
BL	EC:4.2.2.8	0.697284	0.996109	-1				R2	EC:4.1.2.13	0.464932	0.620089	0.0613238				R4	EC:4.1.1.49	0.122316	0.903833	-0.115613
BL	EC:4.2.3.1	0.331212	0.996109	-0.122292				R2	EC:4.1.2.14	0.0865315	0.221879	-0.0176774				R4	EC:4.1.1.5	0.453824	0.998145	0.465793
BL	EC:4.2.3.12	0.870356	0.996109	-0.175703				R2	EC:4.1.2.17	0.576283	0.694698	0.170235				R4	EC:4.1.1.50	0.928181	0.998145	-0.206013
BL	EC:4.2.3.3	0.975467	0.996944	-0.159934				R2	EC:4.1.2.19	0.117134	0.255727	0.521791				R4	EC:4.1.1.65	0.849718	0.998145	-0.162259
BL	EC:4.2.3.4	0.10853	0.996109	-0.139074				R2	EC:4.1.2.20	0.189972	0.347054	0.791667				R4	EC:4.1.1.68	0.946022	0.998145	-0.970606
BL	EC:4.2.3.5	0.131848	0.996109	-0.139862				R2	EC:4.1.2.21	0.293405	NA	-0.9				R4	EC:4.1.1.7	1	NA	-1
BL	EC:4.2.99.18	0.775132	0.996109	-0.145498				R2	EC:4.1.2.22	0.579448	0.697043	-0.0594059				R4	EC:4.1.1.70	0.863979	0.998145	-0.195752
BL	EC:4.2.99.20	0.318446	0.996109	0.175439				R2	EC:4.1.2.25	0.950249	0.966548	0.14378				R4	EC:4.1.1.73	0.162809	0.903833	-0.50858
BL	EC:4.2.99.21	0.878172	0.996109	-1				R2	EC:4.1.2.4	0.0268364	0.137057	0.0273837				R4	EC:4.1.1.74	0.797816	0.998145	-0.961353
BL	EC:4.3.1.1	0.509225	0.996109	-0.236759				R2	EC:4.1.2.40	0.143548	0.292405	-0.0696864				R4	EC:4.1.1.75	0.576881	0.998145	-0.84127
BL	EC:4.3.1.12	0.272726	0.996109	-0.339765				R2	EC:4.1.2.41	0.945813	NA	-0.875				R4	EC:4.1.1.8	0.531558	0.998145	0.568956
BL	EC:4.3.1.14	0.179151	0.996109	0.159642				R2	EC:4.1.2.43	0.188315	0.347054	0.41989				R4	EC:4.1.1.81	0.272888	0.998145	-0.275981
BL	EC:4.3.1.15	0.375308	0.996109	-0.378786				R2	EC:4.1.2.5	0.0969385	0.230078	0.274601				R4	EC:4.1.1.82	0.822795	0.998145	-0.991387
BL	EC:4.3.1.17	0.321432	0.996109	-0.124958				R2	EC:4.1.2.50	0.0995513	0.232422	-0.0879224				R4	EC:4.1.1.85	0.47692	0.998145	-0.988567
BL	EC:4.3.1.18	0.443712	0.996109	-0.372029				R2	EC:4.1.2.52	0.233771	0.390985	-0.107644				R4	EC:4.1.1.86	1	NA	-1
BL	EC:4.3.1.19	0.619741	0.996109	-0.112862				R2	EC:4.1.2.53	0.615012	NA	-1				R4	EC:4.1.1.87	0.562534	0.998145	-0.930556
BL	EC:4.3.1.2	0.750396	0.996109	Inf				R2	EC:4.1.2.57	0.615012	NA	-1				R4	EC:4.1.1.9	0.984308	0.998145	-1
BL	EC:4.3.1.3	0.983297	0.996944	-0.178887				R2	EC:4.1.2.9	0.579448	0.697043	-0.0594059				R4	EC:4.1.1.96	0.174461	0.903833	-0.0434817
BL	EC:4.3.1.4	0.957729	0.996944	-0.182167				R2	EC:4.1.3.1	0.667354	NA	-0.934426				R4	EC:4.1.1.97	1	NA	-1
BL	EC:4.3.1.7	0.889179	0.996109	-0.1875				R2	EC:4.1.3.17	0.696102	NA	-0.666667				R4	EC:4.1.1.98	0.377135	0.998145	-0.205792
BL	EC:4.3.2.1	0.532133	0.996109	-0.149907				R2	EC:4.1.3.25	1	NA	-1				R4	EC:4.1.2.13	0.286618	0.998145	-0.214113
BL	EC:4.3.2.2	0.189854	0.996109	-0.141427				R2	EC:4.1.3.27	0.526606	0.653615	0.0966754				R4	EC:4.1.2.14	0.386873	0.998145	-0.208362
BL	EC:4.3.2.3	0.35972	0.996109	-0.409921				R2	EC:4.1.3.3	0.0222332	0.125915	-0.0429008				R4	EC:4.1.2.17	0.422547	0.998145	-0.240074
BL	EC:4.3.3.6	0.914573	0.996109	-0.0818473				R2	EC:4.1.3.30	0.615012	NA	-1				R4	EC:4.1.2.19	0.476397	0.998145	-0.460251
BL	EC:4.3.3.7	0.464209	0.996109	-0.190846				R2	EC:4.1.3.34	0.134893	0.282474	-0.316628				R4	EC:4.1.2.20	0.847394	0.998145	-0.498824
BL	EC:4.3.99.3	0.157918	0.996109	0.267628				R2	EC:4.1.3.36	0.0522029	0.181857	-0.472867				R4	EC:4.1.2.21	0.903699	0.998145	-0.998106
BL	EC:4.4.1.1	0.395464	0.996109	1.43396				R2	EC:4.1.3.38	0.569356	0.689982	0.198877				R4	EC:4.1.2.22	0.858395	0.998145	-0.0990684
BL	EC:4.4.1.11	0.0430965	0.996109	0.375828				R2	EC:4.1.3.39	0.0119793	0.0958341	0.513656				R4	EC:4.1.2.25	0.695555	0.998145	-0.129005
BL	EC:4.4.1.15	0.342302	0.996109	-0.434556				R2	EC:4.1.3.4	0.0869071	0.221879	-0.420992				R4	EC:4.1.2.29	0.765069	0.998145	-1
BL	EC:4.4.1.16	0.741225	0.996109	-0.183084				R2	EC:4.1.3.40	0.615012	NA	-1				R4	EC:4.1.2.4	0.331396	0.998145	-0.179852
BL	EC:4.4.1.21	0.689837	0.996109	-0.169879				R2	EC:4.1.3.42	0.0865315	0.221879	-0.0176774				R4	EC:4.1.2.40	0.0500393	0.903833	-0.372905
BL	EC:4.4.1.25	0.389522	0.996109	1.47059				R2	EC:4.1.99.1	0.504609	0.640702	0.214632				R4	EC:4.1.2.41	0.689036	0.998145	-0.68254
BL	EC:4.4.1.5	0.278855	0.996109	-0.111203				R2	EC:4.1.99.12	0.245694	0.406207	-0.0046245				R4	EC:4.1.2.43	0.171804	0.903833	0.220727
BL	EC:4.4.1.8	0.495231	0.996109	-0.188164				R2	EC:4.1.99.14	0.104725	0.237315	-0.246579				R4	EC:4.1.2.5	0.254069	0.981987	-0.192071
BL	EC:4.6.1.1	0.143779	0.996109	-0.48179				R2	EC:4.1.99.17	0.140965	0.288596	0.0228799				R4	EC:4.1.2.50	0.86364	0.998145	-0.157275
BL	EC:4.6.1.12	0.123701	0.996109	-0.139392				R2	EC:4.1.99.18	0.659795	0.768225	0.0957888				R4	EC:4.1.2.52	0.0906233	0.903833	-0.417918
BL	EC:4.7.1.1	0.750396	0.996109	Inf				R2	EC:4.1.99.19	0.182372	0.343754	0.0254068				R4	EC:4.1.2.53	1	NA	-1
BL	EC:4.99.1.1	0.282537	0.996109	-0.461923				R2	EC:4.1.99.2	0.874137	NA	-1				R4	EC:4.1.2.57	1	NA	-1
BL	EC:4.99.1.3	0.124354	0.996109	-0.284904				R2	EC:4.1.99.3	0.83887	0.895212	-0.728814				R4	EC:4.1.2.9	0.858395	0.998145	-0.0990684
BL	EC:4.99.1.4	0.0669147	0.996109	-0.248181				R2	EC:4.2.1.1	0.496366	0.633859	0.0883638				R4	EC:4.1.3.1	0.591895	0.998145	-0.995705
BL	EC:4.99.1.5	0.878172	0.996109	-1				R2	EC:4.2.1.10	0.480786	0.620089	0.137343				R4	EC:4.1.3.17	0.366087	0.998145	-0.953461
BL	EC:5.1.1.1	0.345742	0.996109	-0.127066				R2	EC:4.2.1.101	0.945813	NA	-0.875				R4	EC:4.1.3.25	0.92752	0.998145	-0.986367
BL	EC:5.1.1.13	0.87651	0.996109	-0.196964				R2	EC:4.2.1.103	0.945813	NA	-0.866667				R4	EC:4.1.3.27	0.185301	0.910605	-0.126935
BL	EC:5.1.1.18	0.43223	0.996109	-0.0283126				R2	EC:4.2.1.104	0.708194	NA	-1				R4	EC:4.1.3.3	0.662477	0.998145	-0.214795
BL	EC:5.1.1.3	0.228167	0.996109	-0.123022				R2	EC:4.2.1.108	0.845278	NA	-0.777778				R4	EC:4.1.3.30	0.92752	0.998145	-0.999106
BL	EC:5.1.1.4	0.251089	0.996109	-0.351257				R2	EC:4.2.1.109	0.845278	NA	-0.8				R4	EC:4.1.3.34	0.10663	0.903833	-0.470397
BL	EC:5.1.1.7	0.189512	0.996109	-0.173491				R2	EC:4.2.1.11	0.267539	0.434483	0.0984594				R4	EC:4.1.3.36	0.969719	0.998145	-0.212748
BL	EC:5.1.1.8	0.878172	0.996109	-1				R2	EC:4.2.1.113	0.0718028	0.210083	-0.557692				R4	EC:4.1.3.38	0.729163	0.998145	-0.163923
BL	EC:5.1.2.3	0.502195	0.996109	3.25				R2	EC:4.2.1.12	0.268904	0.435164	-0.941176				R4	EC:4.1.3.39	0.36329	0.998145	-0.0379694
BL	EC:5.1.3.1	0.409081	0.996109	-0.181332				R2	EC:4.2.1.120	0.272562	0.436492	-0.0843387				R4	EC:4.1.3.4	0.127776	0.903833	-0.531543
BL	EC:5.1.3.13	0.0899288	0.996109	-0.202355				R2	EC:4.2.1.126	0.00369926	0.0678077	-0.463622				R4	EC:4.1.3.40	0.92752	0.998145	-0.999131
BL	EC:5.1.3.14	0.164728	0.996109	-0.0817274				R2	EC:4.2.1.129	0.96765	NA	0				R4	EC:4.1.3.42	0.389869	0.998145	-0.208029
BL	EC:5.1.3.15	0.503422	0.996109	2.5				R2	EC:4.2.1.130	0.615012	NA	-1				R4	EC:4.1.3.43	1	NA	-1
BL	EC:5.1.3.2	0.985321	0.996944	-0.157764				R2	EC:4.2.1.148	0.845278	NA	Inf				R4	EC:4.1.3.45	1	NA	-1
BL	EC:5.1.3.20	0.623151	0.996109	0.6				R2	EC:4.2.1.149	0.990089	0.990293	0.0728477				R4	EC:4.1.99.1	0.789081	0.998145	-0.160104
BL	EC:5.1.3.22	0.750396	0.996109	Inf				R2	EC:4.2.1.151	0.468972	0.620089	0.225013				R4	EC:4.1.99.12	0.864325	0.998145	-0.140193
BL	EC:5.1.3.23	0.779339	0.996109	-0.222222				R2	EC:4.2.1.153	0.518992	NA	-1				R4	EC:4.1.99.14	0.280346	0.998145	-0.332983
BL	EC:5.1.3.24	0.502019	0.996109	Inf				R2	EC:4.2.1.17	0.0158268	0.101718	0.404444				R4	EC:4.1.99.17	0.960322	0.998145	-0.148843
BL	EC:5.1.3.29	0.302729	0.996109	-0.381197				R2	EC:4.2.1.18	1	NA	-1				R4	EC:4.1.99.18	0.00810959	0.903833	-0.340788
BL	EC:5.1.3.3	0.285468	0.996109	-0.0934351				R2	EC:4.2.1.19	0.469513	0.620089	0.178137				R4	EC:4.1.99.19	0.735298	0.998145	-0.184038
BL	EC:5.1.3.30	0.389058	0.996109	0.154639				R2	EC:4.2.1.2	0.102103	0.23408	0.191166				R4	EC:4.1.99.2	1	NA	-1
BL	EC:5.1.3.31	0.389058	0.996109	0.154639				R2	EC:4.2.1.20	0.972827	0.980541	0.120534				R4	EC:4.1.99.3	0.458822	0.998145	-0.994015
BL	EC:5.1.3.32	0.371132	0.996109	-0.40533				R2	EC:4.2.1.22	0.0104288	0.0883741	-0.966555				R4	EC:4.2.1.1	0.257388	0.981987	-0.373962
BL	EC:5.1.3.4	0.337669	0.996109	-0.253586				R2	EC:4.2.1.24	0.0162376	0.103775	0.783562				R4	EC:4.2.1.10	0.172398	0.903833	-0.128109
BL	EC:5.1.3.6	0.853955	0.996109	-0.108188				R2	EC:4.2.1.28	0.850092	0.900834	0.176887				R4	EC:4.2.1.101	0.689036	0.998145	-0.68254
BL	EC:5.1.3.7	0.916728	0.996109	-0.174359				R2	EC:4.2.1.3	0.0727955	0.212444	0.335051				R4	EC:4.2.1.103	0.671004	0.998145	-0.703704
BL	EC:5.1.3.8	0.56313	0.996109	-0.0153405				R2	EC:4.2.1.32	0.0884412	0.221879	-0.4178				R4	EC:4.2.1.104	1	NA	-1
BL	EC:5.1.3.9	0.427924	0.996109	-0.219079				R2	EC:4.2.1.33	0.959745	0.970777	0.107438				R4	EC:4.2.1.108	1	NA	-1
BL	EC:5.1.99.1	0.508611	0.996109	-0.111851				R2	EC:4.2.1.35	0.959745	0.970777	0.107438				R4	EC:4.2.1.109	1	NA	-1
BL	EC:5.1.99.3	0.934316	0.996109	0				R2	EC:4.2.1.40	0.0860498	0.221879	-0.418888				R4	EC:4.2.1.11	0.166418	0.903833	-0.121028
BL	EC:5.1.99.4	0.662859	0.996109	Inf				R2	EC:4.2.1.41	1	NA	-1				R4	EC:4.2.1.113	0.393869	0.998145	-0.9729
BL	EC:5.1.99.6	0.223305	0.996109	-0.141827				R2	EC:4.2.1.42	0.615012	NA	-1				R4	EC:4.2.1.115	0.719624	0.998145	-1
BL	EC:5.2.1.1	0.519861	0.996109	0.185185				R2	EC:4.2.1.44	0.95134	0.966548	-0.121134				R4	EC:4.2.1.118	1	NA	-1
BL	EC:5.2.1.13	0.613169	0.996109	0.106383				R2	EC:4.2.1.45	0.022468	0.125997	0.405469				R4	EC:4.2.1.12	0.6865	0.998145	-0.995643
BL	EC:5.2.1.2	0.878172	0.996109	-1				R2	EC:4.2.1.46	0.813919	0.88056	0.124585				R4	EC:4.2.1.120	0.128658	0.903833	-0.382599
BL	EC:5.2.1.4	0.662859	0.996109	Inf				R2	EC:4.2.1.47	0.86175	0.909843	0.0806175				R4	EC:4.2.1.126	0.377412	0.998145	-0.302046
BL	EC:5.2.1.8	0.777322	0.996109	-0.141709				R2	EC:4.2.1.49	0.469334	0.620089	0.223548				R4	EC:4.2.1.129	0.896154	0.998145	-0.972222
BL	EC:5.3.1.1	0.821998	0.996109	-0.152442				R2	EC:4.2.1.5	0.0881612	0.221879	-0.418524				R4	EC:4.2.1.130	1	NA	-1
BL	EC:5.3.1.12	0.824935	0.996109	-0.173633				R2	EC:4.2.1.51	0.0136427	0.0994933	0.16291				R4	EC:4.2.1.132	1	NA	-1
BL	EC:5.3.1.13	0.909363	0.996109	-0.175521				R2	EC:4.2.1.53	0.000546771	0.029786	-0.450089				R4	EC:4.2.1.136	1	NA	-1
BL	EC:5.3.1.14	0.719196	0.996109	-0.220077				R2	EC:4.2.1.55	0.610493	0.726747	2.75				R4	EC:4.2.1.141	0.765069	0.998145	-1
BL	EC:5.3.1.16	0.603838	0.996109	-0.151335				R2	EC:4.2.1.56	1	NA	-1				R4	EC:4.2.1.149	0.89421	0.998145	-0.933101
BL	EC:5.3.1.17	0.8126	0.996109	-0.18411				R2	EC:4.2.1.57	1	NA	-1				R4	EC:4.2.1.151	0.970911	0.998145	-0.0877233
BL	EC:5.3.1.22	0.977717	0.996944	0				R2	EC:4.2.1.59	0.0100079	0.0867355	0.171264				R4	EC:4.2.1.17	0.614262	0.998145	-0.240944
BL	EC:5.3.1.23	0.511862	0.996109	-0.130526				R2	EC:4.2.1.6	0.0797746	0.221879	-0.414688				R4	EC:4.2.1.18	0.92752	0.998145	-0.994513
BL	EC:5.3.1.24	0.691591	0.996109	-0.175786				R2	EC:4.2.1.7	0.0174825	0.107742	-0.282269				R4	EC:4.2.1.19	0.22196	0.953217	-0.123662
BL	EC:5.3.1.25	0.319593	0.996109	-0.365256				R2	EC:4.2.1.75	0.633807	0.745196	0.100419				R4	EC:4.2.1.2	0.856185	0.998145	-0.165552
BL	EC:5.3.1.27	0.366662	0.996109	-0.394887				R2	EC:4.2.1.77	0.156226	0.308143	1.68966				R4	EC:4.2.1.20	0.128548	0.903833	-0.11611
BL	EC:5.3.1.28	0.557719	0.996109	-0.243421				R2	EC:4.2.1.79	0.615012	NA	-1				R4	EC:4.2.1.22	0.0846876	0.903833	-0.976393
BL	EC:5.3.1.30	0.915994	0.996109	-0.239583				R2	EC:4.2.1.8	0.0337777	0.15334	-0.199551				R4	EC:4.2.1.24	0.654129	0.998145	-0.11045
BL	EC:5.3.1.4	0.580963	0.996109	-0.245031				R2	EC:4.2.1.80	0.566325	NA	-0.948718				R4	EC:4.2.1.28	0.886373	0.998145	-0.934808
BL	EC:5.3.1.5	0.371417	0.996109	-0.407421				R2	EC:4.2.1.83	0.0877522	0.221879	-0.418739				R4	EC:4.2.1.3	0.591628	0.998145	-0.222788
BL	EC:5.3.1.6	0.0954209	0.996109	-0.179926				R2	EC:4.2.1.84	0.938388	NA	-0.977273				R4	EC:4.2.1.30	1	NA	-1
BL	EC:5.3.1.8	0.601611	0.996109	-0.196951				R2	EC:4.2.1.9	0.451983	0.620089	0.0602476				R4	EC:4.2.1.32	0.156722	0.903833	-0.511621
BL	EC:5.3.1.9	0.0989322	0.996109	-0.134578				R2	EC:4.2.1.90	0.469672	NA	-0.714286				R4	EC:4.2.1.33	0.950833	0.998145	-0.155608
BL	EC:5.3.2.5	0.236013	0.996109	0.225806				R2	EC:4.2.1.91	1	NA	-1				R4	EC:4.2.1.35	0.950833	0.998145	-0.155608
BL	EC:5.3.2.6	0.556096	0.996109	-0.328149				R2	EC:4.2.1.96	0.812681	NA	-0.8				R4	EC:4.2.1.40	0.150486	0.903833	-0.505386
BL	EC:5.3.3.1	1	NA	Inf				R2	EC:4.2.1.99	0.287079	0.444097	-0.692308				R4	EC:4.2.1.41	0.92752	0.998145	-0.988889
BL	EC:5.3.3.10	0.941168	0.996109	-0.25				R2	EC:4.2.2.1	0.863891	0.910029	0.484536				R4	EC:4.2.1.42	0.92752	0.998145	-0.999036
BL	EC:5.3.3.14	0.825819	0.996109	0.4				R2	EC:4.2.2.10	1	NA	-1				R4	EC:4.2.1.44	0.0261514	0.903833	-0.356996
BL	EC:5.3.3.18	0.878172	0.996109	-1				R2	EC:4.2.2.2	0.78235	NA	-1				R4	EC:4.2.1.45	0.396221	0.998145	-0.0334628
BL	EC:5.3.3.2	0.598691	0.996109	-0.4617				R2	EC:4.2.2.20	0.704619	NA	Inf				R4	EC:4.2.1.46	0.170431	0.903833	-0.126328
BL	EC:5.3.3.3	0.875625	0.996109	-0.128893				R2	EC:4.2.2.21	0.704619	NA	Inf				R4	EC:4.2.1.47	0.212719	0.951166	-0.0915147
BL	EC:5.3.3.8	0.503422	0.996109	2.5				R2	EC:4.2.2.23	0.656555	0.765646	0				R4	EC:4.2.1.49	0.680915	0.998145	-0.193515
BL	EC:5.3.4.1	0.503422	0.996109	2.5				R2	EC:4.2.2.3	1	NA	-1				R4	EC:4.2.1.5	0.203031	0.941367	-0.496133
BL	EC:5.3.99.11	0.648715	0.996109	-0.0706522				R2	EC:4.2.2.6	0.874137	NA	-1				R4	EC:4.2.1.51	0.244786	0.966806	-0.133201
BL	EC:5.4.2.10	0.954222	0.996109	-0.158381				R2	EC:4.2.2.7	0.577067	NA	Inf				R4	EC:4.2.1.53	0.226864	0.953217	-0.333351
BL	EC:5.4.2.11	0.720672	0.996109	-0.060513				R2	EC:4.2.2.8	0.704619	NA	Inf				R4	EC:4.2.1.55	0.596228	0.998145	-1
BL	EC:5.4.2.12	0.537834	0.996109	-0.134246				R2	EC:4.2.3.1	0.621903	0.736498	0.169575				R4	EC:4.2.1.56	0.92752	0.998145	-0.986367
BL	EC:5.4.2.2	0.545712	0.996109	-0.172897				R2	EC:4.2.3.12	0.0995513	0.232422	-0.0879224				R4	EC:4.2.1.57	0.92752	0.998145	-0.984985
BL	EC:5.4.2.6	0.873321	0.996109	-0.106941				R2	EC:4.2.3.130	0.845278	NA	-0.8				R4	EC:4.2.1.59	0.757383	0.998145	-0.152147
BL	EC:5.4.2.7	0.503061	0.996109	-0.207929				R2	EC:4.2.3.3	0.429085	0.603205	0.152768				R4	EC:4.2.1.6	0.0890096	0.903833	-0.554425
BL	EC:5.4.2.8	0.917968	0.996109	-0.171361				R2	EC:4.2.3.4	0.0164802	0.104741	0.162154				R4	EC:4.2.1.68	1	NA	-1
BL	EC:5.4.3.2	0.186652	0.996109	0.97786				R2	EC:4.2.3.5	0.0132607	0.0994933	0.162337				R4	EC:4.2.1.7	0.231398	0.953217	-0.314234
BL	EC:5.4.3.3	0.935722	0.996109	-0.0819672				R2	EC:4.2.99.18	0.278193	0.436969	0.169015				R4	EC:4.2.1.75	0.596112	0.998145	-0.178267
BL	EC:5.4.3.5	0.939863	0.996109	-0.0892857				R2	EC:4.2.99.20	0.155772	0.307777	-0.394737				R4	EC:4.2.1.77	0.954221	0.998145	-0.145833
BL	EC:5.4.3.8	0.573328	0.996109	-0.10898				R2	EC:4.2.99.21	1	NA	-1				R4	EC:4.2.1.79	0.92752	0.998145	-0.999026
BL	EC:5.4.4.2	0.606231	0.996109	-0.0221982				R2	EC:4.3.1.1	0.845815	0.898591	0.0813596				R4	EC:4.2.1.8	0.206465	0.941367	-0.305058
BL	EC:5.4.99.1	1	NA	Inf				R2	EC:4.3.1.12	0.485924	0.623202	0.408171				R4	EC:4.2.1.80	0.591895	0.998145	-0.995288
BL	EC:5.4.99.12	0.408413	0.996109	-0.17937				R2	EC:4.3.1.14	0.0609323	0.195256	1.07799				R4	EC:4.2.1.83	0.164415	0.903833	-0.507346
BL	EC:5.4.99.15	0.755983	0.996109	1				R2	EC:4.3.1.15	0.0664587	0.20383	-0.363056				R4	EC:4.2.1.84	0.946022	0.998145	-0.853801
BL	EC:5.4.99.16	0.71164	0.996109	-0.23622				R2	EC:4.3.1.17	0.464781	0.620089	0.114046				R4	EC:4.2.1.9	0.336288	0.998145	-0.193615
BL	EC:5.4.99.18	0.124081	0.996109	-0.139427				R2	EC:4.3.1.18	0.101856	0.233981	-0.33433				R4	EC:4.2.1.90	0.755139	0.998145	-0.998952
BL	EC:5.4.99.19	0.976959	0.996944	-0.14798				R2	EC:4.3.1.19	0.0435476	0.172148	0.395175				R4	EC:4.2.1.91	0.92752	0.998145	-0.978425
BL	EC:5.4.99.2	0.601974	0.996109	-0.109693				R2	EC:4.3.1.2	0.63304	NA	-0.75				R4	EC:4.2.1.96	0.591895	0.998145	-0.973162
BL	EC:5.4.99.20	0.342932	0.996109	3				R2	EC:4.3.1.3	0.475125	0.620089	0.221119				R4	EC:4.2.1.99	0.825825	0.998145	-0.997404
BL	EC:5.4.99.21	0.297928	0.996109	-0.256738				R2	EC:4.3.1.4	0.462983	0.620089	0.225991				R4	EC:4.2.2.1	0.732552	0.998145	0.131003
BL	EC:5.4.99.22	0.22974	0.996109	-0.0752102				R2	EC:4.3.1.7	0.819602	0.882055	-0.433333				R4	EC:4.2.2.10	0.576881	0.998145	-0.84127
BL	EC:5.4.99.23	0.357782	0.996109	-0.143837				R2	EC:4.3.2.1	0.00325588	0.0665129	0.185118				R4	EC:4.2.2.17	0.693715	0.998145	-1
BL	EC:5.4.99.24	0.908411	0.996109	-0.167779				R2	EC:4.3.2.2	0.476582	0.620089	0.137561				R4	EC:4.2.2.2	0.751444	0.998145	-0.955556
BL	EC:5.4.99.25	0.189854	0.996109	-0.141427				R2	EC:4.3.2.3	0.0894498	0.222942	-0.398775				R4	EC:4.2.2.20	0.434114	0.998145	-1
BL	EC:5.4.99.26	0.38687	0.996109	Inf				R2	EC:4.3.3.6	6.19899e-05	0.00644695	-0.463255				R4	EC:4.2.2.21	0.434114	0.998145	-1
BL	EC:5.4.99.27	0.503422	0.996109	2.5				R2	EC:4.3.3.7	0.47469	0.620089	0.0807984				R4	EC:4.2.2.23	0.601254	0.998145	-0.84719
BL	EC:5.4.99.28	0.763062	0.996109	0.279279				R2	EC:4.3.99.3	0.740753	0.825947	0.291667				R4	EC:4.2.2.3	0.92752	0.998145	-0.993559
BL	EC:5.4.99.29	0.763062	0.996109	0.279279				R2	EC:4.4.1.1	0.845278	NA	-0.971831				R4	EC:4.2.2.5	0.838476	0.998145	-1
BL	EC:5.4.99.5	0.213567	0.996109	-0.116966				R2	EC:4.4.1.11	0.353993	0.523891	0.415094				R4	EC:4.2.2.6	0.751444	0.998145	-0.96633
BL	EC:5.4.99.60	0.760659	0.996109	-0.135234				R2	EC:4.4.1.15	0.0799076	0.221879	-0.417345				R4	EC:4.2.2.7	0.658411	0.998145	-1
BL	EC:5.4.99.61	0.760659	0.996109	-0.135234				R2	EC:4.4.1.16	0.0814844	0.221879	-0.115284				R4	EC:4.2.2.8	0.434114	0.998145	-1
BL	EC:5.4.99.62	0.400841	0.996109	-0.396467				R2	EC:4.4.1.2	0.845278	NA	-0.875				R4	EC:4.2.3.1	0.652031	0.998145	-0.147588
BL	EC:5.4.99.9	0.349033	0.996109	-0.244582				R2	EC:4.4.1.21	0.00169926	0.0474135	-0.118044				R4	EC:4.2.3.12	0.86364	0.998145	-0.157275
BL	EC:5.5.1.19	0.750396	0.996109	Inf				R2	EC:4.4.1.25	1	NA	-1				R4	EC:4.2.3.130	1	NA	-1
BL	EC:5.5.1.2	0.878172	0.996109	-1				R2	EC:4.4.1.5	0.019451	0.114701	-0.0433351				R4	EC:4.2.3.3	0.969141	0.998145	-0.162063
BL	EC:5.5.1.4	0.604848	0.996109	-0.0208756				R2	EC:4.4.1.8	0.014212	0.0994933	0.0322561				R4	EC:4.2.3.4	0.232835	0.953217	-0.132302
BL	EC:5.99.1.2	0.945214	0.996109	-0.159817				R2	EC:4.6.1.1	0.176261	0.335513	-0.202503				R4	EC:4.2.3.5	0.226707	0.953217	-0.131698
BL	EC:5.99.1.3	0.601166	0.996109	-0.142298				R2	EC:4.6.1.12	0.0146217	0.0994933	0.162563				R4	EC:4.2.99.18	0.965021	0.998145	-0.159517
BL	EC:6.1.1.1	0.94279	0.996109	-0.156603				R2	EC:4.99.1.1	0.471061	0.620089	0.315447				R4	EC:4.2.99.20	0.393869	0.998145	-0.972595
BL	EC:6.1.1.10	0.541609	0.996109	-0.159807				R2	EC:4.99.1.3	0.722862	0.817956	0.119213				R4	EC:4.2.99.21	0.641014	0.998145	-0.876543
BL	EC:6.1.1.11	0.189854	0.996109	-0.141427				R2	EC:4.99.1.4	0.0690119	0.20681	0.376923				R4	EC:4.3.1.1	0.29215	0.998145	-0.254293
BL	EC:6.1.1.12	0.812527	0.996109	-0.149387				R2	EC:4.99.1.5	1	NA	-1				R4	EC:4.3.1.12	0.241518	0.964128	-0.335655
BL	EC:6.1.1.13	0.837155	0.996109	-0.289755				R2	EC:5.1.1.1	0.00856674	0.0809947	0.221745				R4	EC:4.3.1.14	0.0636175	0.903833	0.235856
BL	EC:6.1.1.14	0.757977	0.996109	-0.164523				R2	EC:5.1.1.13	0.00814239	0.0809589	-0.239864				R4	EC:4.3.1.15	0.0856903	0.903833	-0.510675
BL	EC:6.1.1.15	0.189854	0.996109	-0.141427				R2	EC:5.1.1.18	0.310946	0.472407	0.487203				R4	EC:4.3.1.17	0.407821	0.998145	-0.185859
BL	EC:6.1.1.16	0.189854	0.996109	-0.141427				R2	EC:5.1.1.3	0.137297	0.283516	0.185108				R4	EC:4.3.1.18	0.171679	0.903833	-0.452062
BL	EC:6.1.1.17	0.206366	0.996109	-0.136621				R2	EC:5.1.1.4	0.518528	0.653615	0.402087				R4	EC:4.3.1.19	0.775929	0.998145	-0.20002
BL	EC:6.1.1.18	0.639638	0.996109	-0.15062				R2	EC:5.1.1.7	0.878318	0.916784	0.122499				R4	EC:4.3.1.2	1	NA	-1
BL	EC:6.1.1.19	0.941518	0.996109	-0.156613				R2	EC:5.1.1.8	1	NA	-1				R4	EC:4.3.1.29	1	NA	-1
BL	EC:6.1.1.2	0.231827	0.996109	-0.142654				R2	EC:5.1.2.3	0.448253	NA	-0.986486				R4	EC:4.3.1.3	0.660299	0.998145	-0.199735
BL	EC:6.1.1.20	0.183298	0.996109	-0.141409				R2	EC:5.1.3.1	0.613141	0.728383	0.090282				R4	EC:4.3.1.4	0.935491	0.998145	-0.0839547
BL	EC:6.1.1.21	0.189854	0.996109	-0.141427				R2	EC:5.1.3.13	0.555318	0.678039	0.0986788				R4	EC:4.3.1.7	0.86264	0.998145	-0.997946
BL	EC:6.1.1.22	0.0928691	0.996109	-0.137156				R2	EC:5.1.3.14	0.696926	0.798606	0.17294				R4	EC:4.3.2.1	0.0273922	0.903833	-0.115851
BL	EC:6.1.1.23	0.0260709	0.996109	-0.370738				R2	EC:5.1.3.15	0.656983	NA	-0.916667				R4	EC:4.3.2.2	0.148092	0.903833	-0.125058
BL	EC:6.1.1.24	0.865406	0.996109	-0.0310078				R2	EC:5.1.3.2	0.195352	0.351467	0.175254				R4	EC:4.3.2.3	0.0636076	0.903833	-0.602811
BL	EC:6.1.1.3	0.233185	0.996109	-0.142695				R2	EC:5.1.3.20	0.673892	NA	0.1				R4	EC:4.3.3.6	0.0328982	0.903833	-0.427631
BL	EC:6.1.1.4	0.189854	0.996109	-0.141427				R2	EC:5.1.3.22	0.454679	NA	-1				R4	EC:4.3.3.7	0.0405198	0.903833	-0.243817
BL	EC:6.1.1.5	0.189854	0.996109	-0.141427				R2	EC:5.1.3.23	0.886617	0.922468	0.155646				R4	EC:4.3.99.3	0.228776	0.953217	-0.404562
BL	EC:6.1.1.6	0.133789	0.996109	-0.139044				R2	EC:5.1.3.24	0.615012	NA	-1				R4	EC:4.4.1.1	0.904766	0.998145	-0.988486
BL	EC:6.1.1.7	0.726773	0.996109	-0.15638				R2	EC:5.1.3.25	0.518992	NA	-1				R4	EC:4.4.1.11	0.577301	0.998145	-0.119889
BL	EC:6.1.1.9	0.190746	0.996109	-0.141445				R2	EC:5.1.3.29	0.0461792	0.177756	-0.398487				R4	EC:4.4.1.15	0.064977	0.903833	-0.605281
BL	EC:6.1.2.1	0.607749	0.996109	-0.636364				R2	EC:5.1.3.3	0.0259442	0.134199	-0.0524229				R4	EC:4.4.1.16	0.654076	0.998145	-0.163946
BL	EC:6.2.1.1	0.836147	0.996109	-0.114348				R2	EC:5.1.3.30	0.667887	0.774126	-0.113821				R4	EC:4.4.1.2	1	NA	-1
BL	EC:6.2.1.14	0.542592	0.996109	12.6667				R2	EC:5.1.3.31	0.667887	0.774126	-0.113821				R4	EC:4.4.1.21	0.783151	0.998145	-0.188083
BL	EC:6.2.1.16	0.878172	0.996109	2.5				R2	EC:5.1.3.32	0.0897144	0.223116	-0.409195				R4	EC:4.4.1.25	0.36339	0.998145	-1
BL	EC:6.2.1.17	0.579702	0.996109	Inf				R2	EC:5.1.3.4	0.500784	0.636898	0.186341				R4	EC:4.4.1.5	0.975492	0.998145	-0.156861
BL	EC:6.2.1.20	0.579702	0.996109	Inf				R2	EC:5.1.3.6	0.00497743	0.0749877	1.60937				R4	EC:4.4.1.8	0.424714	0.998145	-0.185661
BL	EC:6.2.1.22	0.332736	0.996109	-0.355664				R2	EC:5.1.3.7	0.00717399	0.0779922	0.881781				R4	EC:4.6.1.1	0.0917483	0.903833	-0.405517
BL	EC:6.2.1.26	0.609562	0.996109	-0.0230391				R2	EC:5.1.3.8	0.035385	0.157642	-0.436116				R4	EC:4.6.1.12	0.233694	0.953217	-0.13214
BL	EC:6.2.1.3	0.892581	0.996109	-0.172079				R2	EC:5.1.3.9	0.736747	0.824695	0.120365				R4	EC:4.6.1.13	1	NA	-1
BL	EC:6.2.1.30	0.0453482	0.996109	-0.312099				R2	EC:5.1.99.1	0.548897	0.673031	0.0512509				R4	EC:4.7.1.1	1	NA	-1
BL	EC:6.2.1.34	0.878172	0.996109	-1				R2	EC:5.1.99.3	1	NA	-1				R4	EC:4.99.1.1	0.502591	0.998145	-0.290081
BL	EC:6.2.1.5	0.206703	0.996109	-0.459048				R2	EC:5.1.99.4	0.945813	NA	-0.904762				R4	EC:4.99.1.3	0.103983	0.903833	-0.337346
BL	EC:6.3.1.1	0.237461	0.996109	-0.0973232				R2	EC:5.1.99.6	0.0232644	0.129827	0.166253				R4	EC:4.99.1.4	0.948342	0.998145	-0.163635
BL	EC:6.3.1.10	0.721225	0.996109	-0.13003				R2	EC:5.2.1.1	0.782948	0.861243	-0.4				R4	EC:4.99.1.5	0.576881	0.998145	-0.84127
BL	EC:6.3.1.11	0.502019	0.996109	Inf				R2	EC:5.2.1.13	0.429185	0.603205	-0.26506				R4	EC:5.1.1.1	0.128652	0.903833	-0.125617
BL	EC:6.3.1.12	0.963507	0.996944	-0.118122				R2	EC:5.2.1.2	0.945813	NA	-0.904762				R4	EC:5.1.1.13	0.0959836	0.903833	-0.313204
BL	EC:6.3.1.13	0.750396	0.996109	Inf				R2	EC:5.2.1.4	0.945813	NA	-0.909091				R4	EC:5.1.1.18	0.109345	0.903833	0.180867
BL	EC:6.3.1.2	0.145307	0.996109	-0.129457				R2	EC:5.2.1.8	0.0477844	0.17832	-0.0387464				R4	EC:5.1.1.3	0.0800491	0.903833	-0.101241
BL	EC:6.3.1.5	0.904168	0.996109	-0.127735				R2	EC:5.3.1.1	0.221323	0.376777	0.170416				R4	EC:5.1.1.4	0.213877	0.953217	-0.340211
BL	EC:6.3.1.8	0.750396	0.996109	Inf				R2	EC:5.3.1.12	0.0408575	0.168794	-0.141973				R4	EC:5.1.1.7	0.366689	0.998145	-0.171827
BL	EC:6.3.2.1	0.882968	0.996109	-0.155226				R2	EC:5.3.1.13	0.207341	0.361798	-0.0956953				R4	EC:5.1.1.8	0.92752	0.998145	-0.903382
BL	EC:6.3.2.10	0.190503	0.996109	-0.141445				R2	EC:5.3.1.14	0.675418	0.778253	-0.709141				R4	EC:5.1.2.3	0.946022	0.998145	-0.998863
BL	EC:6.3.2.12	0.794968	0.996109	-0.146898				R2	EC:5.3.1.16	0.0010978	0.0419576	0.19323				R4	EC:5.1.3.1	0.793798	0.998145	-0.141795
BL	EC:6.3.2.13	0.149879	0.996109	-0.131526				R2	EC:5.3.1.17	0.0652049	0.201087	-0.258131				R4	EC:5.1.3.13	0.0974531	0.903833	-0.112287
BL	EC:6.3.2.17	0.794968	0.996109	-0.146898				R2	EC:5.3.1.22	0.466339	NA	-0.94				R4	EC:5.1.3.14	0.660303	0.998145	-0.113816
BL	EC:6.3.2.2	0.742005	0.996109	0.342365				R2	EC:5.3.1.23	0.000623982	0.0310363	0.829849				R4	EC:5.1.3.15	0.837256	0.998145	-0.997852
BL	EC:6.3.2.29	0.238968	0.996109	-0.909091				R2	EC:5.3.1.24	0.476252	0.620089	0.0834411				R4	EC:5.1.3.2	0.577134	0.998145	-0.127355
BL	EC:6.3.2.3	0.258091	0.996109	6				R2	EC:5.3.1.25	0.0509424	0.181857	-0.389656				R4	EC:5.1.3.20	0.731056	0.998145	-0.997617
BL	EC:6.3.2.30	0.238968	0.996109	-0.909091				R2	EC:5.3.1.26	0.709311	NA	-0.6				R4	EC:5.1.3.22	1	NA	-1
BL	EC:6.3.2.31	0.750396	0.996109	Inf				R2	EC:5.3.1.27	0.150852	0.301177	-0.292262				R4	EC:5.1.3.23	0.177556	0.903833	0.0964737
BL	EC:6.3.2.32	0.291338	0.996109	2.2				R2	EC:5.3.1.28	0.0196156	0.115078	0.40728				R4	EC:5.1.3.24	1	NA	-1
BL	EC:6.3.2.34	0.750396	0.996109	Inf				R2	EC:5.3.1.30	0.9512	0.966548	-0.121447				R4	EC:5.1.3.25	1	NA	-1
BL	EC:6.3.2.35	0.548839	0.996109	-0.0756563				R2	EC:5.3.1.4	0.00677806	0.0779922	0.446376				R4	EC:5.1.3.29	0.0369605	0.903833	-0.549362
BL	EC:6.3.2.4	0.324446	0.996109	-0.144529				R2	EC:5.3.1.5	0.0649056	0.201087	-0.380579				R4	EC:5.1.3.3	0.602463	0.998145	-0.13973
BL	EC:6.3.2.5	0.600591	0.996109	-0.128058				R2	EC:5.3.1.6	0.107202	0.241416	0.0849105				R4	EC:5.1.3.30	0.451068	0.998145	-0.570912
BL	EC:6.3.2.6	0.0870007	0.996109	-0.137619				R2	EC:5.3.1.8	0.0147205	0.0994933	-0.129305				R4	EC:5.1.3.31	0.451068	0.998145	-0.570912
BL	EC:6.3.2.7	0.661685	0.996109	-0.545455				R2	EC:5.3.1.9	0.735449	0.824695	0.144735				R4	EC:5.1.3.32	0.0480331	0.903833	-0.643221
BL	EC:6.3.2.8	0.189854	0.996109	-0.141427				R2	EC:5.3.2.5	0.0411585	0.168794	1.82039				R4	EC:5.1.3.4	0.323748	0.998145	-0.280322
BL	EC:6.3.2.9	0.96037	0.996944	-0.155544				R2	EC:5.3.2.6	0.907914	0.936568	-0.116604				R4	EC:5.1.3.6	0.449765	0.998145	-0.0291088
BL	EC:6.3.3.1	0.12125	0.996109	-0.139328				R2	EC:5.3.2.8	0.864314	NA	-0.333333				R4	EC:5.1.3.7	0.333867	0.998145	-0.0202129
BL	EC:6.3.3.2	0.95926	0.996944	-0.156089				R2	EC:5.3.3.1	0.518992	NA	-1				R4	EC:5.1.3.8	0.702157	0.998145	-0.104871
BL	EC:6.3.3.3	0.599635	0.996109	-0.0209817				R2	EC:5.3.3.10	1	NA	-1				R4	EC:5.1.3.9	0.293468	0.998145	-0.244572
BL	EC:6.3.4.13	0.124598	0.996109	-0.139459				R2	EC:5.3.3.14	0.615012	NA	-1				R4	EC:5.1.99.1	0.549778	0.998145	-0.0697865
BL	EC:6.3.4.14	0.912578	0.996109	-0.150857				R2	EC:5.3.3.17	0.945813	NA	0				R4	EC:5.1.99.3	0.92752	0.998145	-0.973226
BL	EC:6.3.4.15	0.1504	0.996109	-0.14148				R2	EC:5.3.3.18	0.901618	NA	-0.911765				R4	EC:5.1.99.4	0.85761	0.998145	-0.259259
BL	EC:6.3.4.18	0.200708	0.996109	0.840136				R2	EC:5.3.3.2	3.17983e-05	0.00363772	-0.932685				R4	EC:5.1.99.6	0.237068	0.960851	-0.129856
BL	EC:6.3.4.19	0.190163	0.996109	-0.141474				R2	EC:5.3.3.3	0.272562	0.436492	-0.0843387				R4	EC:5.2.1.1	0.456082	0.998145	-0.643606
BL	EC:6.3.4.2	0.229784	0.996109	-0.142384				R2	EC:5.3.3.4	0.518992	NA	-1				R4	EC:5.2.1.13	0.0527099	0.903833	0.641414
BL	EC:6.3.4.20	0.876772	0.996109	-0.124587				R2	EC:5.3.3.8	0.615012	NA	-1				R4	EC:5.2.1.2	0.621993	0.998145	-0.973475
BL	EC:6.3.4.21	0.983309	0.996944	-0.156041				R2	EC:5.3.4.1	0.615012	NA	-1				R4	EC:5.2.1.4	0.366087	0.998145	-0.876543
BL	EC:6.3.4.3	0.26367	0.996109	-0.0987931				R2	EC:5.3.99.10	0.845278	NA	-0.875				R4	EC:5.2.1.8	0.962538	0.998145	-0.159175
BL	EC:6.3.4.4	0.198134	0.996109	-0.141816				R2	EC:5.3.99.11	0.0156862	0.101384	1.30682				R4	EC:5.3.1.1	0.373097	0.998145	-0.135205
BL	EC:6.3.4.5	0.53052	0.996109	-0.149878				R2	EC:5.4.1.3	0.518992	NA	-1				R4	EC:5.3.1.12	0.579888	0.998145	-0.221641
BL	EC:6.3.4.6	0.755983	0.996109	1				R2	EC:5.4.2.10	0.104759	0.237315	0.319004				R4	EC:5.3.1.13	0.794306	0.998145	-0.192173
BL	EC:6.3.5.1	0.159851	0.996109	-0.140292				R2	EC:5.4.2.11	0.00359118	0.0678077	-0.603445				R4	EC:5.3.1.14	0.0331098	0.903833	-0.96633
BL	EC:6.3.5.10	0.730318	0.996109	-0.130989				R2	EC:5.4.2.12	0.670388	0.776239	0.143618				R4	EC:5.3.1.16	0.0171157	0.903833	-0.110144
BL	EC:6.3.5.11	0.305873	0.996109	-0.241171				R2	EC:5.4.2.2	0.596327	0.713596	0.101185				R4	EC:5.3.1.17	0.858067	0.998145	-0.173938
BL	EC:6.3.5.2	0.661028	0.996109	-0.15245				R2	EC:5.4.2.6	0.140512	0.288596	0.762926				R4	EC:5.3.1.22	0.943721	0.998145	-0.998372
BL	EC:6.3.5.3	0.209995	0.996109	-0.14003				R2	EC:5.4.2.7	0.10585	0.238841	0.324745				R4	EC:5.3.1.23	0.0228217	0.903833	0.00740685
BL	EC:6.3.5.4	0.634831	0.996109	-0.130592				R2	EC:5.4.2.8	0.207731	0.361798	-0.0860743				R4	EC:5.3.1.24	0.470289	0.998145	-0.139359
BL	EC:6.3.5.5	0.996813	0.998212	-0.156559				R2	EC:5.4.3.2	0.000153109	0.0134736	-0.925				R4	EC:5.3.1.25	0.0335095	0.903833	-0.56058
BL	EC:6.3.5.6	0.543399	0.996109	-0.176551				R2	EC:5.4.3.3	0.0354144	0.157642	0.120219				R4	EC:5.3.1.26	0.366087	0.998145	Inf
BL	EC:6.3.5.7	0.543399	0.996109	-0.176551				R2	EC:5.4.3.5	0.00849219	0.0809589	-0.0543478				R4	EC:5.3.1.27	0.241218	0.964128	-0.424897
BL	EC:6.3.5.9	0.305873	0.996109	-0.241171				R2	EC:5.4.3.8	0.00165049	0.0474135	0.713888				R4	EC:5.3.1.28	0.789186	0.998145	-0.14379
BL	EC:6.4.1.1	0.0752786	0.996109	-0.0351848				R2	EC:5.4.4.2	0.0519681	0.181857	-0.473334				R4	EC:5.3.1.30	0.83844	0.998145	-0.215933
BL	EC:6.4.1.2	0.630105	0.996109	-0.133896				R2	EC:5.4.99.1	0.975113	NA	-0.75				R4	EC:5.3.1.31	1	NA	-1
BL	EC:6.4.1.3	0.500676	0.996109	0.5				R2	EC:5.4.99.12	0.0890994	0.222556	0.205552				R4	EC:5.3.1.4	0.743095	0.998145	-0.144775
BL	EC:6.4.1.4	0.697284	0.996109	2.25				R2	EC:5.4.99.15	1	NA	-1				R4	EC:5.3.1.5	0.0518337	0.903833	-0.622691
BL	EC:6.4.1.5	0.82581	0.996109	0.5				R2	EC:5.4.99.16	0.0322828	0.14952	-0.434122				R4	EC:5.3.1.6	0.0371804	0.903833	-0.187001
BL	EC:6.5.1.1	0.656436	0.996109	0.136095				R2	EC:5.4.99.17	0.96765	NA	0				R4	EC:5.3.1.8	0.420345	0.998145	-0.193478
BL	EC:6.5.1.2	0.344132	0.996109	-0.144208				R2	EC:5.4.99.18	0.0146398	0.0994933	0.162553				R4	EC:5.3.1.9	0.32271	0.998145	-0.130238
BL	EC:6.5.1.3	0.291088	0.996109	-0.370932				R2	EC:5.4.99.19	0.157991	0.310328	0.334249				R4	EC:5.3.2.5	0.531759	0.998145	0.0969267
BL	EC:6.5.1.4	0.750396	0.996109	Inf				R2	EC:5.4.99.2	0.19315	0.349073	-0.124641				R4	EC:5.3.2.6	0.651546	0.998145	-0.0568809
BL	EC:6.5.1.6	0.878172	0.996109	-1				R2	EC:5.4.99.20	0.0921748	0.224957	-0.842105				R4	EC:5.3.2.8	0.755139	0.998145	-0.988304
BL	EC:6.5.1.7	0.878172	0.996109	-1				R2	EC:5.4.99.21	0.0398791	0.167113	0.389357				R4	EC:5.3.3.10	0.862073	0.998145	-0.983354
BL	EC:6.6.1.1	0.934316	0.996109	0				R2	EC:5.4.99.22	0.0991608	0.232422	-0.000352102				R4	EC:5.3.3.14	0.642708	0.998145	-0.999119
BL	EC:6.6.1.2	0.611911	0.996109	-1				R2	EC:5.4.99.23	0.568265	0.689982	0.11895				R4	EC:5.3.3.17	0.755139	0.998145	Inf
								R2	EC:5.4.99.24	0.015128	0.0994933	0.471639				R4	EC:5.3.3.18	0.554534	0.998145	-0.948914
								R2	EC:5.4.99.25	0.477507	0.620089	0.137515				R4	EC:5.3.3.2	0.527014	0.998145	-0.510786
								R2	EC:5.4.99.26	0.483732	NA	-1				R4	EC:5.3.3.3	0.128658	0.903833	-0.382599
								R2	EC:5.4.99.27	0.615012	NA	-1				R4	EC:5.3.3.4	1	NA	-1
								R2	EC:5.4.99.28	0.000317819	0.0209246	-0.958146				R4	EC:5.3.3.8	0.92752	0.998145	-0.99907
								R2	EC:5.4.99.29	0.000317819	0.0209246	-0.958146				R4	EC:5.3.4.1	0.781739	0.998145	-0.996783
								R2	EC:5.4.99.5	0.00573175	0.0779922	0.248639				R4	EC:5.3.99.11	0.285633	0.998145	0.0582011
								R2	EC:5.4.99.60	0.06781	0.2053	0.371225				R4	EC:5.4.2.10	0.859561	0.998145	-0.147034
								R2	EC:5.4.99.61	0.06781	0.2053	0.371225				R4	EC:5.4.2.11	0.826761	0.998145	-0.14006
								R2	EC:5.4.99.62	0.0795713	0.221879	-0.37331				R4	EC:5.4.2.12	0.300479	0.998145	-0.130935
								R2	EC:5.4.99.9	0.0990143	0.232422	0.349636				R4	EC:5.4.2.2	0.868516	0.998145	-0.15673
								R2	EC:5.5.1.1	0.518992	NA	-1				R4	EC:5.4.2.6	0.181833	0.903833	0.0957388
								R2	EC:5.5.1.19	0.945813	NA	-0.928571				R4	EC:5.4.2.7	0.880828	0.998145	-0.177561
								R2	EC:5.5.1.2	1	NA	-1				R4	EC:5.4.2.8	0.899788	0.998145	-0.120358
								R2	EC:5.5.1.4	0.0434649	0.172148	-0.487247				R4	EC:5.4.2.9	1	NA	-1
								R2	EC:5.99.1.2	0.0361762	0.159175	0.211132				R4	EC:5.4.3.2	0.00347949	0.725914	-0.919153
								R2	EC:5.99.1.3	0.0321468	0.149496	0.227639				R4	EC:5.4.3.3	0.721306	0.998145	-0.328311
								R2	EC:6.1.1.1	0.0290167	0.141859	0.0985641				R4	EC:5.4.3.5	0.65164	0.998145	-0.365079
								R2	EC:6.1.1.10	0.00527316	0.0749877	0.0900797				R4	EC:5.4.3.8	0.149586	0.903833	-0.0424185
								R2	EC:6.1.1.11	0.478482	0.620089	0.137489				R4	EC:5.4.4.2	0.841874	0.998145	-0.296658
								R2	EC:6.1.1.12	0.0303658	0.144744	0.216353				R4	EC:5.4.99.1	1	NA	-1
								R2	EC:6.1.1.13	0.000716298	0.0338078	-0.873831				R4	EC:5.4.99.12	0.622307	0.998145	-0.142732
								R2	EC:6.1.1.14	0.804039	0.875324	0.117362				R4	EC:5.4.99.15	0.92752	0.998145	-0.993994
								R2	EC:6.1.1.15	0.479923	0.620089	0.137465				R4	EC:5.4.99.16	0.565421	0.998145	-0.330203
								R2	EC:6.1.1.16	0.477507	0.620089	0.137515				R4	EC:5.4.99.17	0.896154	0.998145	-0.972222
								R2	EC:6.1.1.17	0.00669602	0.0779922	0.201171				R4	EC:5.4.99.18	0.228519	0.953217	-0.132025
								R2	EC:6.1.1.18	0.0836644	0.221879	0.163541				R4	EC:5.4.99.19	0.698031	0.998145	-0.196563
								R2	EC:6.1.1.19	0.0285167	0.141859	0.0984891				R4	EC:5.4.99.2	0.887764	0.998145	-0.119096
								R2	EC:6.1.1.2	0.701706	0.80195	0.134389				R4	EC:5.4.99.20	0.406012	0.998145	-0.99352
								R2	EC:6.1.1.20	0.472852	0.620089	0.137509				R4	EC:5.4.99.21	0.935814	0.998145	-0.19347
								R2	EC:6.1.1.21	0.477507	0.620089	0.137515				R4	EC:5.4.99.22	0.881565	0.998145	-0.124592
								R2	EC:6.1.1.22	0.237141	0.394984	0.150823				R4	EC:5.4.99.23	0.284725	0.998145	-0.121484
								R2	EC:6.1.1.23	0.132063	0.278232	-0.0931039				R4	EC:5.4.99.24	0.514145	0.998145	-0.124566
								R2	EC:6.1.1.24	2.70487e-06	0.000442053	-0.868086				R4	EC:5.4.99.25	0.147676	0.903833	-0.125043
								R2	EC:6.1.1.3	0.702646	0.802223	0.134363				R4	EC:5.4.99.26	1	NA	-1
								R2	EC:6.1.1.4	0.477507	0.620089	0.137515				R4	EC:5.4.99.27	0.734687	0.998145	-0.999117
								R2	EC:6.1.1.5	0.477507	0.620089	0.137515				R4	EC:5.4.99.28	0.0332731	0.903833	-0.992759
								R2	EC:6.1.1.6	0.357937	0.526324	0.141318				R4	EC:5.4.99.29	0.0332731	0.903833	-0.992759
								R2	EC:6.1.1.7	0.389497	0.559779	0.148526				R4	EC:5.4.99.5	0.481239	0.998145	-0.137328
								R2	EC:6.1.1.9	0.481983	0.620933	0.137341				R4	EC:5.4.99.60	0.818718	0.998145	-0.155554
								R2	EC:6.1.2.1	0.816674	0.88056	0.666667				R4	EC:5.4.99.61	0.818718	0.998145	-0.155554
								R2	EC:6.2.1.1	0.0296949	0.143337	-0.246984				R4	EC:5.4.99.62	0.0757453	0.903833	-0.565637
								R2	EC:6.2.1.14	0.495988	NA	-1				R4	EC:5.4.99.9	0.768057	0.998145	-0.141415
								R2	EC:6.2.1.16	1	NA	-1				R4	EC:5.5.1.1	1	NA	-1
								R2	EC:6.2.1.17	0.352432	0.522257	-0.578947				R4	EC:5.5.1.19	0.755139	0.998145	Inf
								R2	EC:6.2.1.20	0.545207	NA	-0.666667				R4	EC:5.5.1.2	0.92752	0.998145	-0.994273
								R2	EC:6.2.1.22	0.223124	0.37838	-0.239493				R4	EC:5.5.1.4	0.822326	0.998145	-0.131248
								R2	EC:6.2.1.26	0.0527958	0.181857	-0.473434				R4	EC:5.99.1.2	0.232651	0.953217	-0.125011
								R2	EC:6.2.1.3	0.104437	0.237315	-0.112295				R4	EC:5.99.1.3	0.286429	0.998145	-0.127196
								R2	EC:6.2.1.30	0.47454	0.620089	0.0317028				R4	EC:6.1.1.1	0.964498	0.998145	-0.149622
								R2	EC:6.2.1.34	1	NA	-1				R4	EC:6.1.1.10	0.860064	0.998145	-0.145568
								R2	EC:6.2.1.5	0.938605	0.959575	0.114934				R4	EC:6.1.1.11	0.148972	0.903833	-0.125223
								R2	EC:6.3.1.1	0.866067	0.911293	0.128733				R4	EC:6.1.1.12	0.0428229	0.903833	-0.0931647
								R2	EC:6.3.1.10	0.0554892	0.184534	0.380819				R4	EC:6.1.1.13	0.406807	0.998145	0.431415
								R2	EC:6.3.1.11	0.708194	NA	-1				R4	EC:6.1.1.14	0.405829	0.998145	-0.127231
								R2	EC:6.3.1.12	0.000792835	0.0338078	-0.611916				R4	EC:6.1.1.15	0.14925	0.903833	-0.125335
								R2	EC:6.3.1.13	1	NA	-1				R4	EC:6.1.1.16	0.148356	0.903833	-0.125108
								R2	EC:6.3.1.2	0.063	0.199208	0.205373				R4	EC:6.1.1.17	0.110207	0.903833	-0.126331
								R2	EC:6.3.1.5	0.0650864	0.201087	-0.456844				R4	EC:6.1.1.18	0.320685	0.998145	-0.135377
								R2	EC:6.3.1.8	0.560311	NA	-1				R4	EC:6.1.1.19	0.967768	0.998145	-0.149539
								R2	EC:6.3.2.1	0.287654	0.444097	0.00798471				R4	EC:6.1.1.2	0.212149	0.951166	-0.13002
								R2	EC:6.3.2.10	0.479354	0.620089	0.137468				R4	EC:6.1.1.20	0.138757	0.903833	-0.12515
								R2	EC:6.3.2.12	0.0874697	0.221879	0.230097				R4	EC:6.1.1.21	0.148509	0.903833	-0.125137
								R2	EC:6.3.2.13	0.327254	0.493903	0.100593				R4	EC:6.1.1.22	0.0940074	0.903833	-0.121979
								R2	EC:6.3.2.17	0.0874697	0.221879	0.230097				R4	EC:6.1.1.23	0.0249126	0.903833	-0.416344
								R2	EC:6.3.2.2	3.93563e-13	4.50236e-10	-0.979664				R4	EC:6.1.1.24	0.651326	0.998145	-0.239221
								R2	EC:6.3.2.29	0.412447	0.586865	-0.964158				R4	EC:6.1.1.3	0.19819	0.941367	-0.128395
								R2	EC:6.3.2.3	0.20878	0.362434	-0.6875				R4	EC:6.1.1.4	0.148356	0.903833	-0.125108
								R2	EC:6.3.2.30	0.412447	0.586865	-0.964158				R4	EC:6.1.1.5	0.149601	0.903833	-0.125339
								R2	EC:6.3.2.31	0.518992	NA	-1				R4	EC:6.1.1.6	0.825788	0.998145	-0.153588
								R2	EC:6.3.2.32	0.0176229	0.107742	11.2				R4	EC:6.1.1.7	0.981838	0.998145	-0.15543
								R2	EC:6.3.2.34	0.518992	NA	-1				R4	EC:6.1.1.9	0.149877	0.903833	-0.125417
								R2	EC:6.3.2.35	0.27381	0.436937	0.469336				R4	EC:6.1.2.1	0.461154	0.998145	0.8107
								R2	EC:6.3.2.4	0.914085	0.941236	0.128682				R4	EC:6.2.1.1	0.60757	0.998145	-0.110069
								R2	EC:6.3.2.5	0.75848	0.840887	0.13109				R4	EC:6.2.1.13	1	NA	-1
								R2	EC:6.3.2.6	0.00679235	0.0779922	0.166363				R4	EC:6.2.1.14	0.43625	0.998145	-1
								R2	EC:6.3.2.7	0.740469	0.825947	-0.190476				R4	EC:6.2.1.16	0.92752	0.998145	-0.990079
								R2	EC:6.3.2.8	0.480135	0.620089	0.137442				R4	EC:6.2.1.17	0.614766	0.998145	-0.998021
								R2	EC:6.3.2.9	0.0605511	0.19458	0.100882				R4	EC:6.2.1.20	0.896154	0.998145	-0.999495
								R2	EC:6.3.3.1	0.0146904	0.0994933	0.162162				R4	EC:6.2.1.22	0.126911	0.903833	-0.455531
								R2	EC:6.3.3.2	0.475418	0.620089	0.137879				R4	EC:6.2.1.26	0.955716	0.998145	-0.207035
								R2	EC:6.3.3.3	0.0527539	0.181857	-0.459673				R4	EC:6.2.1.3	0.972711	0.998145	-0.146215
								R2	EC:6.3.4.13	0.0144578	0.0994933	0.16265				R4	EC:6.2.1.30	0.145778	0.903833	-0.23781
								R2	EC:6.3.4.14	0.375365	0.544136	0.205404				R4	EC:6.2.1.34	0.576881	0.998145	-0.84127
								R2	EC:6.3.4.15	0.0315253	0.147807	0.157769				R4	EC:6.2.1.5	0.231819	0.953217	-0.356918
								R2	EC:6.3.4.18	5.79716e-10	3.31598e-07	-0.952066				R4	EC:6.3.1.1	0.531744	0.998145	-0.143116
								R2	EC:6.3.4.19	0.469221	0.620089	0.137696				R4	EC:6.3.1.10	0.886211	0.998145	-0.168185
								R2	EC:6.3.4.2	0.479961	0.620089	0.137496				R4	EC:6.3.1.11	0.822795	0.998145	-0.988426
								R2	EC:6.3.4.20	0.0260107	0.134199	-0.291741				R4	EC:6.3.1.12	0.65819	0.998145	0.0271903
								R2	EC:6.3.4.21	0.0930171	0.224957	0.325651				R4	EC:6.3.1.13	1	NA	-1
								R2	EC:6.3.4.3	0.650433	0.760834	0.109695				R4	EC:6.3.1.2	0.0272106	0.903833	-0.113116
								R2	EC:6.3.4.4	0.477615	0.620089	0.137341				R4	EC:6.3.1.5	0.61259	0.998145	-0.378405
								R2	EC:6.3.4.5	0.00315543	0.0665129	0.185288				R4	EC:6.3.1.8	1	NA	-1
								R2	EC:6.3.4.6	0.938388	NA	-0.958333				R4	EC:6.3.2.1	0.709987	0.998145	-0.113166
								R2	EC:6.3.5.1	0.0110913	0.090815	0.163561				R4	EC:6.3.2.10	0.151706	0.903833	-0.125677
								R2	EC:6.3.5.10	0.0602754	0.19458	0.378436				R4	EC:6.3.2.12	0.0741662	0.903833	-0.122611
								R2	EC:6.3.5.11	0.226202	0.381113	0.245569				R4	EC:6.3.2.13	0.579464	0.998145	-0.131046
								R2	EC:6.3.5.2	0.118453	0.257965	0.107031				R4	EC:6.3.2.17	0.0741662	0.903833	-0.122611
								R2	EC:6.3.5.3	0.0246114	0.133365	0.16191				R4	EC:6.3.2.2	0.00111989	0.41688	-0.973278
								R2	EC:6.3.5.4	0.648741	0.760409	0.167444				R4	EC:6.3.2.29	0.126271	0.903833	-0.976675
								R2	EC:6.3.5.5	0.633139	0.745176	0.129521				R4	EC:6.3.2.3	0.458822	0.998145	-0.993975
								R2	EC:6.3.5.6	0.256242	0.419372	0.280154				R4	EC:6.3.2.30	0.126271	0.903833	-0.976675
								R2	EC:6.3.5.7	0.256242	0.419372	0.280154				R4	EC:6.3.2.31	1	NA	-1
								R2	EC:6.3.5.9	0.226202	0.381113	0.245569				R4	EC:6.3.2.32	0.470678	0.998145	0.290323
								R2	EC:6.4.1.1	0.288161	0.44428	-0.00330068				R4	EC:6.3.2.34	1	NA	-1
								R2	EC:6.4.1.2	0.032492	0.149882	0.318678				R4	EC:6.3.2.35	0.593823	0.998145	-0.067582
								R2	EC:6.4.1.3	0.00613116	0.0779922	-0.970506				R4	EC:6.3.2.4	0.567309	0.998145	-0.14387
								R2	EC:6.4.1.4	0.922706	NA	-0.909091				R4	EC:6.3.2.5	0.681039	0.998145	-0.135013
								R2	EC:6.4.1.5	1	NA	-1				R4	EC:6.3.2.6	0.181091	0.903833	-0.130287
								R2	EC:6.5.1.1	0.462837	0.620089	-0.0335366				R4	EC:6.3.2.7	0.74264	0.998145	-0.0505051
								R2	EC:6.5.1.2	0.164058	0.319452	0.150529				R4	EC:6.3.2.8	0.146133	0.903833	-0.124858
								R2	EC:6.5.1.3	0.421324	0.596529	-0.158498				R4	EC:6.3.2.9	0.906773	0.998145	-0.146963
								R2	EC:6.5.1.4	0.615012	NA	-1				R4	EC:6.3.3.1	0.219194	0.953217	-0.131698
								R2	EC:6.5.1.6	0.945813	NA	-0.935484				R4	EC:6.3.3.2	0.148373	0.903833	-0.112102
								R2	EC:6.5.1.7	0.945813	NA	-0.935484				R4	EC:6.3.3.3	0.860864	0.998145	-0.290881
								R2	EC:6.6.1.1	0.821014	NA	-0.896104				R4	EC:6.3.4.13	0.228676	0.953217	-0.132031
								R2	EC:6.6.1.2	0.83913	NA	-0.931034				R4	EC:6.3.4.14	0.161123	0.903833	-0.209124
																R4	EC:6.3.4.15	0.202374	0.941367	-0.130175
																R4	EC:6.3.4.18	0.0046873	0.775488	-0.954176
																R4	EC:6.3.4.19	0.142854	0.903833	-0.12466
																R4	EC:6.3.4.2	0.148152	0.903833	-0.125167
																R4	EC:6.3.4.20	0.847175	0.998145	-0.15318
																R4	EC:6.3.4.21	0.902001	0.998145	-0.153182
																R4	EC:6.3.4.3	0.336217	0.998145	-0.120756
																R4	EC:6.3.4.4	0.14852	0.903833	-0.125044
																R4	EC:6.3.4.5	0.0254966	0.903833	-0.115129
																R4	EC:6.3.4.6	0.92752	0.998145	-0.988426
																R4	EC:6.3.5.1	0.205507	0.941367	-0.114499
																R4	EC:6.3.5.10	0.892459	0.998145	-0.168575
																R4	EC:6.3.5.11	0.973538	0.998145	-0.173316
																R4	EC:6.3.5.2	0.862996	0.998145	-0.148037
																R4	EC:6.3.5.3	0.334015	0.998145	-0.136343
																R4	EC:6.3.5.4	0.229968	0.953217	-0.0979034
																R4	EC:6.3.5.5	0.0274485	0.903833	-0.107177
																R4	EC:6.3.5.6	0.915419	0.998145	-0.136428
																R4	EC:6.3.5.7	0.915419	0.998145	-0.136428
																R4	EC:6.3.5.9	0.973538	0.998145	-0.173316
																R4	EC:6.4.1.1	0.820506	0.998145	-0.117947
																R4	EC:6.4.1.2	0.59184	0.998145	-0.171321
																R4	EC:6.4.1.3	0.107286	0.903833	-0.978829
																R4	EC:6.4.1.4	0.600999	0.998145	-0.973677
																R4	EC:6.4.1.5	0.862073	0.998145	-0.985036
																R4	EC:6.4.1.6	0.911304	0.998145	-1
																R4	EC:6.5.1.1	0.785085	0.998145	-0.726202
																R4	EC:6.5.1.2	0.243529	0.965993	-0.133087
																R4	EC:6.5.1.3	0.462733	0.998145	-0.298516
																R4	EC:6.5.1.4	1	NA	-1
																R4	EC:6.5.1.6	0.591895	0.998145	-0.971215
																R4	EC:6.5.1.7	0.591895	0.998145	-0.971215
																R4	EC:6.6.1.1	0.788352	0.998145	-0.98143
																R4	EC:6.6.1.2	0.633918	0.998145	-0.950029
